# Supplementary material for: Genetic insights into the causal role of metabolic, immune, and microbial factors in migraine
Source: Research Square preprint supplement (doi:10.21203/rs.3.rs-7372193/v1), 2025-08-25
Supplement: Supplementary file 1 [file ecefcf631d78852e907b0b40.xlsx]

## Sheet: Supplementary File
Title:Genetic Insights into the Causal Role of Metabolic, Immune, and Microbial Factors in Migraine: A Mendelian Randomization Study
Supplementary Table 1. Forward MR results between identified biological factors and migraine
Supplementary Table 2. Reverse MR results between biological factors and migraine
Supplementary Table 3. BWMR results between identified biological factors and migraine
Supplementary Table 4. Colocalization analysis results of identified biological factors and migraine under 9 genes
Supplementary Table 5. The most likely sites of colocalization of identified biological factors and migraines under 9 genes
Supplementary Figure 1. The association between identified biological factors and migraine risk in Mendelian randomization analyses. A Distribution of beta values for 95 identified biological factors. B-F Lollipop plots of association of (B) 46 metabolites, (C) 5 inflammatory factors, (D) 23 immune cells, (E) 13 intestinal floras, and (F) 8 skin floras with risk of migraine. OR, odd ratio.

## Sheet: Supplementary Tables 1
exposure	id.exposure	type	nsnp	method	pval	b	se	lo_ci	up_ci	or	or_lci95	or_uci95
(2,4 or 2,5)-dimethylphenol sulfate levels	GCST90200217	metabolin	21	Inverse variance weighted	0.00208653	-0.0738688	0.0240018	-0.120912	-0.0268252	0.928794	0.886112	0.973531
1-(1-enyl-palmitoyl)-2-palmitoleoyl-GPC (P-16:0/16:1) levels	GCST90200070	metabolin	34	Inverse variance weighted	0.0220085	-0.0411061	0.0179485	-0.0762852	-0.00592698	0.959727	0.926552	0.994091
1-oleoyl-GPG (18:1) levels	GCST90199969	metabolin	25	Inverse variance weighted	0.0100278	0.0436747	0.0169619	0.0104294	0.07692	1.04464	1.01048	1.07996
1,7-dimethyluric acid levels	GCST90199756	metabolin	36	Inverse variance weighted	0.0256938	0.054806	0.0245678	0.00665316	0.102959	1.05634	1.00668	1.10845
2-aminobutyrate levels	GCST90200305	metabolin	20	Inverse variance weighted	0.0309384	0.0688187	0.031892	0.0063103	0.131327	1.07124	1.00633	1.14034
2-palmitoyl-GPC (16:0) levels	GCST90199789	metabolin	16	Inverse variance weighted	0.00796897	0.0871762	0.0328547	0.0227809	0.151571	1.09109	1.02304	1.16366
3-aminoisobutyrate levels	GCST90200310	metabolin	30	Inverse variance weighted	0.0159101	-0.0322998	0.013397	-0.0585579	-0.00604167	0.968216	0.943124	0.993977
3-hydroxyhippurate levels	GCST90199869	metabolin	19	Inverse variance weighted	0.0466101	0.0742907	0.0373353	0.00111356	0.147468	1.07712	1.00111	1.1589
4-hydroxy-2-oxoglutaric acid levels	GCST90199897	metabolin	28	Inverse variance weighted	0.00402987	0.0737127	0.0256319	0.0234741	0.123951	1.0765	1.02375	1.13196
Activated & secreting CD4 regulatory T cell %CD4 regulatory T cell	ebi-a-GCST90001502	immunocyte	37	Inverse variance weighted	0.0421452	0.00708563	0.00348688	0.000251346	0.0139199	1.00711	1.00025	1.01402
Adenosine 5'-diphosphate (ADP) to tyrosine ratio	GCST90200732	metabolin	22	Inverse variance weighted	0.00411734	-0.0480492	0.0167476	-0.0808745	-0.015224	0.953087	0.922309	0.984891
Alliin levels	GCST90199919	metabolin	19	Inverse variance weighted	9.9739e-05	-0.0756402	0.0194386	-0.11374	-0.0375404	0.92715	0.89249	0.963155
Alpha-ketoglutarate to ornithine ratio	GCST90200814	metabolin	21	Inverse variance weighted	3.37206e-05	0.125682	0.0303084	0.0662774	0.185086	1.13392	1.06852	1.20332
Arabitol/xylitol levels	GCST90200011	metabolin	24	Inverse variance weighted	0.0322837	-0.0635098	0.0296653	-0.121654	-0.00536586	0.938465	0.885455	0.994649
Beta-hydroxyisovaleroylcarnitine levels	GCST90199802	metabolin	36	Inverse variance weighted	0.027087	0.0434301	0.0196493	0.00491747	0.0819427	1.04439	1.00493	1.08539
Bilirubin (Z,Z) to androsterone glucuronide ratio	GCST90201015	metabolin	32	Inverse variance weighted	0.0358705	0.0276963	0.0131988	0.00182662	0.053566	1.02808	1.00183	1.05503
Bilirubin degradation product, C16H18N2O5 (3) levels	GCST90200271	metabolin	29	Inverse variance weighted	0.0284394	0.0331674	0.0151368	0.00349921	0.0628356	1.03372	1.00351	1.06485
Brevibacillaceae abundance in stool	GCST90032245	intestinal flora	17	Inverse variance weighted	0.00902953	0.0133301	0.0051055	0.00332334	0.0233369	1.01342	1.00333	1.02361
Brevibacillales abundance in stool	GCST90032246	intestinal flora	19	Inverse variance weighted	0.000807447	0.0179711	0.00536414	0.00745738	0.0284848	1.01813	1.00749	1.02889
C-C motif chemokine 25 levels	GCST90274768	inflammatory factors	35	Inverse variance weighted	0.0234498	-0.029721	0.0131159	-0.0554282	-0.00401381	0.970716	0.94608	0.995994
CAG-495 abundance in stool	GCST90032290	intestinal flora	23	Inverse variance weighted	0.0219035	0.00136072	0.000593674	0.000197121	0.00252432	1.00136	1.0002	1.00253
CD127 on CD8+ T cell	ebi-a-GCST90001927	immunocyte	24	Inverse variance weighted	0.0209804	-0.0326514	0.014145	-0.0603757	-0.00492722	0.967876	0.941411	0.995085
CD20 on IgD+ CD24+ B cell	ebi-a-GCST90001746	immunocyte	23	Inverse variance weighted	0.0217933	0.030365	0.013237	0.00442052	0.0563095	1.03083	1.00443	1.05793
CD20 on memory B cell	ebi-a-GCST90001758	immunocyte	28	Inverse variance weighted	0.0134711	0.0284512	0.0115137	0.00588428	0.051018	1.02886	1.0059	1.05234
CD24 on IgD+ CD38- unswitched memory B cell	ebi-a-GCST90001767	immunocyte	21	Inverse variance weighted	0.0207815	-0.0188114	0.00813665	-0.0347592	-0.00286354	0.981364	0.965838	0.997141
CD25 on CD45RA- CD4 not regulatory T cell	ebi-a-GCST90001933	immunocyte	26	Inverse variance weighted	0.000315341	0.0348677	0.00967914	0.0158966	0.0538388	1.03548	1.01602	1.05531
CD28- CD127- CD25++ CD8+ T cell %CD8+ T cell	ebi-a-GCST90001674	immunocyte	18	Inverse variance weighted	0.0378742	-0.0255433	0.0123028	-0.0496568	-0.00142975	0.97478	0.951556	0.998571
CD28+ CD45RA- CD8dim T cell %T cell	ebi-a-GCST90001667	immunocyte	28	Inverse variance weighted	0.0165684	0.0091885	0.0038347	0.00167249	0.0167045	1.00923	1.00167	1.01684
CD3 on CD28+ CD45RA- CD8+ T cell	ebi-a-GCST90001863	immunocyte	18	Inverse variance weighted	0.0293244	0.0296429	0.0136033	0.00298045	0.0563053	1.03009	1.00298	1.05792
CD33+ HLA DR+ CD14dim Absolute Count	ebi-a-GCST90001520	immunocyte	28	Inverse variance weighted	0.0148967	-0.016612	0.00682249	-0.029984	-0.00323988	0.983525	0.970461	0.996765
CD33dim HLA DR+ CD11b+ Absolute Count	ebi-a-GCST90001525	immunocyte	26	Inverse variance weighted	0.0124691	-0.0232577	0.00930837	-0.0415021	-0.00501331	0.977011	0.959347	0.994999
CD4+ CD8dim T cell %lymphocyte	ebi-a-GCST90001610	immunocyte	19	Inverse variance weighted	0.0102253	-0.0419487	0.0163344	-0.0739642	-0.00993324	0.958919	0.928705	0.990116
CD45 on CD33+ HLA DR+ CD14dim	ebi-a-GCST90002043	immunocyte	15	Inverse variance weighted	0.0490561	-0.0263371	0.013382	-0.0525658	-0.00010844	0.974007	0.948792	0.999892
CD8 on naive CD8+ T cell	ebi-a-GCST90002055	immunocyte	16	Inverse variance weighted	0.00243518	-0.0518778	0.0171141	-0.0854215	-0.0183341	0.949445	0.918125	0.981833
CD8+ and CD8dim T cell %leukocyte	ebi-a-GCST90001614	immunocyte	14	Inverse variance weighted	0.0357896	0.046386	0.0220958	0.00307818	0.0896939	1.04748	1.00308	1.09384
Cerotoylcarnitine (C26) levels	GCST90200136	metabolin	30	Inverse variance weighted	0.026369	0.047468	0.0213749	0.00557317	0.0893628	1.04861	1.00559	1.09348
Dimethylarginine (sdma + adma) levels	GCST90199832	metabolin	21	Inverse variance weighted	0.0319666	-0.0623863	0.0290869	-0.119397	-0.00537606	0.93952	0.887456	0.994638
Enorma massiliensis abundance in stool	GCST90032357	intestinal flora	30	Inverse variance weighted	0.0111165	-0.00339392	0.00133671	-0.00601387	-0.000773976	0.996612	0.994004	0.999226
Eugenol sulfate levels	GCST90199986	metabolin	23	Inverse variance weighted	0.0303702	0.0508056	0.0234643	0.00481553	0.0967956	1.05212	1.00483	1.10164
Faecalicoccus abundance in stool	GCST90032389	intestinal flora	17	Inverse variance weighted	0.00110816	0.00617093	0.00189204	0.00246253	0.00987933	1.00619	1.00247	1.00993
Faecalicoccus pleomorphus abundance in stool	GCST90032388	intestinal flora	17	Inverse variance weighted	0.0464407	0.0043292	0.00217398	6.81882e-05	0.00859021	1.00434	1.00007	1.00863
FSC-A on HLA DR+ CD8+ T cell	ebi-a-GCST90001978	immunocyte	18	Inverse variance weighted	0.0331351	-0.0165567	0.00777148	-0.0317888	-0.00132459	0.98358	0.968711	0.998676
Glucose-to-mannose ratio	GCST90200953	metabolin	26	Inverse variance weighted	0.0265314	0.054976	0.0247825	0.00640239	0.10355	1.05652	1.00642	1.1091
Glucuronide of piperine metabolite C17H21NO3 (5) levels	GCST90200212	metabolin	22	Inverse variance weighted	0.0397897	-0.0547184	0.026615	-0.106884	-0.00255306	0.946752	0.89863	0.99745
Glutamate to kynurenine ratio	GCST90200812	metabolin	24	Inverse variance weighted	0.00246666	0.0824296	0.0272278	0.0290631	0.135796	1.08592	1.02949	1.14545
Glycerol to carnitine ratio	GCST90200929	metabolin	28	Inverse variance weighted	0.00524693	-0.057089	0.0204512	-0.0971733	-0.0170046	0.94451	0.907399	0.983139
Glycosyl-N-stearoyl-sphingosine (d18:1/18:0) levels	GCST90199846	metabolin	33	Inverse variance weighted	0.0156728	0.0476691	0.0197269	0.00900429	0.0863338	1.04882	1.00904	1.09017
Granulocytic Myeloid-Derived Suppressor Cells Absolute Count	ebi-a-GCST90001524	immunocyte	21	Inverse variance weighted	0.0413812	0.0270018	0.0132382	0.00105496	0.0529486	1.02737	1.00106	1.05438
Hepatocyte growth factor levels	GCST90274793	inflammatory factors	30	Inverse variance weighted	0.0185061	0.0756644	0.0321247	0.0127	0.138629	1.0786	1.01278	1.1487
HLA DR+ CD8+ T cell Absolute Count	ebi-a-GCST90001627	immunocyte	34	Inverse variance weighted	0.0301683	0.0158393	0.00730638	0.0015188	0.0301598	1.01597	1.00152	1.03062
HVEM on CD45RA- CD4+ T cell	ebi-a-GCST90001880	immunocyte	19	Inverse variance weighted	0.01979	-0.0141504	0.00607235	-0.0260523	-0.00224862	0.985949	0.974284	0.997754
HVEM on CD8+ T cell	ebi-a-GCST90001881	immunocyte	16	Inverse variance weighted	0.00895028	-0.0374195	0.0143153	-0.0654775	-0.00936146	0.963272	0.93662	0.990682
HVEM on Central Memory CD4+ T cell	ebi-a-GCST90001876	immunocyte	18	Inverse variance weighted	0.0053455	-0.0156346	0.00561297	-0.026636	-0.00463318	0.984487	0.973716	0.995378
HVEM on Effector Memory CD8+ T cell	ebi-a-GCST90001873	immunocyte	18	Inverse variance weighted	0.0153747	-0.0259095	0.0106913	-0.0468644	-0.00495464	0.974423	0.954217	0.995058
Hydrogenophaga abundance in stool	GCST90032434	intestinal flora	11	Inverse variance weighted	0.0127604	-0.0155623	0.00624894	-0.0278102	-0.00331435	0.984558	0.972573	0.996691
Lysine levels	GCST90200402	metabolin	32	Inverse variance weighted	0.0142315	0.0467863	0.0190858	0.00937813	0.0841945	1.0479	1.00942	1.08784
Monocyte chemoattractant protein-1 levels	GCST90274821	inflammatory factors	30	Inverse variance weighted	0.0203064	-0.0497632	0.0214437	-0.0917929	-0.00773343	0.951455	0.912294	0.992296
N-acetylkynurenine (2) levels	GCST90200015	metabolin	17	Inverse variance weighted	0.0195182	0.0457915	0.0196069	0.00736206	0.084221	1.04686	1.00739	1.08787
N-acetylputrescine levels	GCST90200351	metabolin	23	Inverse variance weighted	0.0283176	0.0351567	0.0160324	0.00373326	0.0665802	1.03578	1.00374	1.06885
N-palmitoylglycine levels	GCST90199923	metabolin	19	Inverse variance weighted	0.0481777	0.0435036	0.0220183	0.000347829	0.0866594	1.04446	1.00035	1.09053
N-stearoyl-sphingosine (d18:1/18:0) levels	GCST90200341	metabolin	22	Inverse variance weighted	0.00621662	0.0752816	0.0275139	0.0213544	0.129209	1.07819	1.02158	1.13793
Negativibacillus abundance in stool	GCST90032490	intestinal flora	11	Inverse variance weighted	0.0426072	0.00393659	0.00194156	0.000131134	0.00774206	1.00394	1.00013	1.00777
Oncostatin-M levels	GCST90274831	inflammatory factors	23	Inverse variance weighted	0.0294752	0.0758414	0.0348364	0.00756201	0.144121	1.07879	1.00759	1.15502
Palmitoyl-sphingosine-phosphoethanolamine (d18:1/16:0) levels	GCST90200237	metabolin	28	Inverse variance weighted	0.0412734	-0.0501279	0.0245632	-0.0982717	-0.00198404	0.951108	0.906403	0.998018
PDL-1 on CD14- CD16+ monocyte	ebi-a-GCST90001999	immunocyte	18	Inverse variance weighted	0.0370262	0.0299717	0.0143717	0.00180328	0.0581402	1.03043	1.0018	1.05986
Phosphate to N-palmitoyl-sphingosine (d18:1 to 16:0) ratio	GCST90200827	metabolin	24	Inverse variance weighted	0.0266588	0.0626794	0.0282788	0.0072529	0.118106	1.06469	1.00728	1.12536
Spermidine to choline ratio	GCST90200808	metabolin	17	Inverse variance weighted	0.00129077	0.102804	0.0319462	0.040189	0.165418	1.10827	1.04101	1.17989
Stearoylcarnitine (C18) levels	GCST90199743	metabolin	20	Inverse variance weighted	0.00244398	0.0830247	0.0273992	0.0293224	0.136727	1.08657	1.02976	1.14652
Succinivibrio abundance in stool	GCST90032571	intestinal flora	43	Inverse variance weighted	0.0151565	-0.0029521	0.00121555	-0.00533458	-0.000569627	0.997052	0.99468	0.999431
Syntrophorhabdia abundance in stool	GCST90032574	intestinal flora	13	Inverse variance weighted	0.034992	0.0129908	0.0061613	0.000914652	0.0250669	1.01308	1.00092	1.02538
T-cell surface glycoprotein CD6 isoform levels	GCST90274774	inflammatory factors	24	Inverse variance weighted	3.457e-06	0.0781279	0.0168321	0.0451371	0.111119	1.08126	1.04617	1.11753
Terrisporobacter othiniensis abundance in stool	GCST90032577	intestinal flora	12	Inverse variance weighted	0.0456373	-0.00447828	0.00224056	-0.00886978	-8.67828e-05	0.995532	0.991169	0.999913
UBA6960 abundance in stool	GCST90032622	intestinal flora	16	Inverse variance weighted	0.0326065	0.00895078	0.00418868	0.000740957	0.0171606	1.00899	1.00074	1.01731
Undecenoylcarnitine (C11:1) levels	GCST90200236	metabolin	29	Inverse variance weighted	0.0301626	0.042424	0.0195687	0.00406929	0.0807788	1.04334	1.00408	1.08413
Univariate microbial feature (asv: asv001) at the forehead (sebaceous skin)	GCST90133203	skin flora	10	Inverse variance weighted	0.0358275	-0.0161641	0.00770128	-0.0312586	-0.00106955	0.983966	0.969225	0.998931
Univariate microbial feature (asv: asv013) at the antecubital fossa (moist skin)	GCST90133169	skin flora	4	Inverse variance weighted	0.0120638	-0.0324926	0.0129438	-0.0578625	-0.00712265	0.96803	0.94378	0.992903
Univariate microbial feature (asv: asv016) at the antecubital fossa (moist skin)	GCST90133182	skin flora	12	Inverse variance weighted	0.0127956	0.0152944	0.00614379	0.00325258	0.0273362	1.01541	1.00326	1.02771
Univariate microbial feature (asv: asv057) at the antecubital fossa (moist skin)	GCST90133191	skin flora	13	Inverse variance weighted	0.0119612	0.0117707	0.0046834	0.00259127	0.0209502	1.01184	1.00259	1.02117
Univariate microbial feature (asv: asv086) at the dorsal forearm (dry skin)	GCST90133276	skin flora	8	Inverse variance weighted	0.0371111	0.0128748	0.00617635	0.000769202	0.0249805	1.01296	1.00077	1.0253
Univariate microbial feature (class: gammaproteobacteria) at the antecubital fossa (moist skin)	GCST90133287	skin flora	6	Inverse variance weighted	0.0191861	-0.0223181	0.00952992	-0.0409967	-0.00363942	0.977929	0.959832	0.996367
Univariate microbial feature (family: neisseriaceae) at the forehead (sebaceous skin)	GCST90133200	skin flora	7	Inverse variance weighted	0.0411143	0.0186869	0.00914961	0.000753705	0.0366202	1.01886	1.00075	1.0373
Univariate microbial feature (genus: anaerococcus) at the dorsal forearm (dry skin)	GCST90133230	skin flora	5	Inverse variance weighted	0.031373	0.0300322	0.0139535	0.00268338	0.057381	1.03049	1.00269	1.05906
Veillonella abundance in stool	GCST90032643	intestinal flora	8	Inverse variance weighted	0.0346767	0.00450739	0.00213406	0.00032462	0.00869015	1.00452	1.00032	1.00873
X-11483 levels	GCST90200469	metabolin	25	Inverse variance weighted	0.0473974	0.0500609	0.0252484	0.00057395	0.0995478	1.05134	1.00057	1.10467
X-12798 levels	GCST90200709	metabolin	35	Inverse variance weighted	0.00335679	0.0468765	0.0159823	0.0155512	0.0782018	1.04799	1.01567	1.08134
X-12812 levels	GCST90200506	metabolin	18	Inverse variance weighted	3.72547e-05	0.102126	0.0247645	0.0535874	0.150664	1.10752	1.05505	1.16261
X-18922 levels	GCST90200578	metabolin	29	Inverse variance weighted	0.000814258	0.0643141	0.0192103	0.026662	0.101966	1.06643	1.02702	1.10735
X-21286 levels	GCST90200562	metabolin	28	Inverse variance weighted	0.0149232	0.0679297	0.0279059	0.0132341	0.122625	1.07029	1.01332	1.13046
X-22776 levels	GCST90200595	metabolin	12	Inverse variance weighted	0.0171726	-0.094477	0.0396464	-0.172184	-0.0167701	0.909849	0.841824	0.98337
X-23587 levels	GCST90200609	metabolin	25	Inverse variance weighted	0.0386594	0.054304	0.0262618	0.00283086	0.105777	1.05581	1.00283	1.11157
X-23780 levels	GCST90200614	metabolin	26	Inverse variance weighted	0.0302231	0.0510705	0.0235657	0.00488174	0.0972592	1.0524	1.00489	1.10215
X-24494 levels	GCST90200635	metabolin	19	Inverse variance weighted	0.0324552	0.0468201	0.0218912	0.00391326	0.0897269	1.04793	1.00392	1.09388
X-25217 levels	GCST90200654	metabolin	14	Inverse variance weighted	0.0230778	0.0561674	0.02472	0.0077162	0.104619	1.05777	1.00775	1.11029
Xanthurenate levels	GCST90199626	metabolin	25	Inverse variance weighted	0.0466511	0.0490045	0.0246321	0.00072551	0.0972835	1.05023	1.00073	1.10217
Ximenoylcarnitine (C26:1) levels	GCST90200149	metabolin	31	Inverse variance weighted	0.00169993	0.0652961	0.0208069	0.0245146	0.106078	1.06748	1.02482	1.11191

## Sheet: Supplementary Tables 2
type	exposure	id.exposure	method	nsnp	b	se	pval	lo_ci	up_ci	or	or_lci95	or_uci95	Q	Q_pval	Egger_intercept	Egger_se	Egger_pval	Presso_value
inflammatory factors	C-C motif chemokine 25 levels	GCST90274768	MR Egger	72	-0.0474859	0.0717605	0.510319	-0.188137	0.0931647	0.953624	0.828502	1.09764	71.045	0.442672	0.00255035	0.00469428	0.588656	0.453
inflammatory factors			Weighted median	72	-0.0326938	0.0414578	0.430343	-0.113951	0.0485635	0.967835	0.892302	1.04976	71.3446	0.466197
inflammatory factors			Inverse variance weighted	72	-0.0115711	0.0277817	0.677043	-0.0660234	0.0428811	0.988496	0.936109	1.04381
inflammatory factors			Simple mode	72	-0.0810417	0.103765	0.437393	-0.284422	0.122338	0.922155	0.752449	1.13014
inflammatory factors			Weighted mode	72	-0.0735464	0.0864444	0.397744	-0.242977	0.0958846	0.929093	0.784289	1.10063
inflammatory factors	T-cell surface glycoprotein CD5 levels	GCST90274773	MR Egger	72	0.0351753	0.0728196	0.630569	-0.107551	0.177902	1.0358	0.898031	1.19471	74.1296	0.345135	0.00377003	0.00476638	0.431638	0.384
inflammatory factors			Weighted median	72	0.0508672	0.0429568	0.236354	-0.0333281	0.135063	1.05218	0.967221	1.14461	74.7921	0.356261
inflammatory factors			Inverse variance weighted	72	0.0882064	0.0283413	0.00185641	0.0326575	0.143755	1.09221	1.0332	1.1546
inflammatory factors			Simple mode	72	0.0494989	0.0973969	0.612875	-0.141399	0.240397	1.05074	0.868143	1.27175
inflammatory factors			Weighted mode	72	0.0494989	0.0790954	0.533444	-0.105528	0.204526	1.05074	0.899849	1.22694
inflammatory factors	T-cell surface glycoprotein CD6 isoform levels	GCST90274774	MR Egger	72	0.0344843	0.0803484	0.669107	-0.122999	0.191967	1.03509	0.884265	1.21163	88.4324	0.0675726	0.00111919	0.00525797	0.832058	0.082
inflammatory factors			Weighted median	72	0.0643809	0.0425222	0.130012	-0.0189626	0.147724	1.0665	0.981216	1.15919	88.4896	0.0782543
inflammatory factors			Inverse variance weighted	72	0.0502336	0.0311146	0.106425	-0.010751	0.111218	1.05152	0.989307	1.11764
inflammatory factors			Simple mode	72	0.066037	0.104787	0.530584	-0.139345	0.271419	1.06827	0.869928	1.31182
inflammatory factors			Weighted mode	72	0.0563073	0.0884278	0.526329	-0.117011	0.229626	1.05792	0.889575	1.25813
inflammatory factors	Hepatocyte growth factor levels	GCST90274793	MR Egger	72	-0.0408232	0.0707158	0.565598	-0.179426	0.0977797	0.959999	0.83575	1.10272	69.8997	0.480894	0.00671963	0.00462543	0.150759	0.455
inflammatory factors			Weighted median	72	0.0307533	0.041803	0.461931	-0.0511807	0.112687	1.03123	0.950107	1.11928	72.0102	0.444213
inflammatory factors			Inverse variance weighted	72	0.0538273	0.0276884	0.0518911	-0.000442007	0.108097	1.0553	0.999558	1.11416
inflammatory factors			Simple mode	72	-0.012568	0.100496	0.90083	-0.209539	0.184404	0.987511	0.810958	1.2025
inflammatory factors			Weighted mode	72	-0.00171037	0.0792957	0.982852	-0.15713	0.153709	0.998291	0.854593	1.16615
inflammatory factors	Interleukin-4 levels	GCST90274813	MR Egger	72	0.0458541	0.079367	0.565289	-0.109705	0.201413	1.04692	0.896098	1.22313	41.2246	0.997599	0.00170766	0.00523207	0.745108	0.997
inflammatory factors			Weighted median	72	0.0713415	0.0448901	0.112004	-0.0166431	0.159326	1.07395	0.983495	1.17272	41.3311	0.99813
inflammatory factors			Inverse variance weighted	72	0.0696397	0.0314349	0.0267354	0.00802722	0.131252	1.07212	1.00806	1.14026
inflammatory factors			Simple mode	72	0.106337	0.115266	0.359374	-0.119585	0.332259	1.1122	0.887289	1.39411
inflammatory factors			Weighted mode	72	0.0888599	0.0896697	0.325066	-0.0868928	0.264612	1.09293	0.916775	1.30293
inflammatory factors	Monocyte chemoattractant protein-1 levels	GCST90274821	MR Egger	72	-0.0326576	0.0733917	0.657709	-0.176505	0.11119	0.96787	0.838194	1.11761	73.6138	0.360748	0.00366347	0.00480181	0.448066	0.375
inflammatory factors			Weighted median	72	0.000503254	0.0403569	0.990051	-0.0785963	0.0796028	1.0005	0.924413	1.08286	74.2259	0.373541
inflammatory factors			Inverse variance weighted	72	0.0189163	0.0284932	0.506762	-0.0369303	0.0747629	1.0191	0.963743	1.07763
inflammatory factors			Simple mode	72	0.0149304	0.0954889	0.876195	-0.172228	0.202089	1.01504	0.841787	1.22396
inflammatory factors			Weighted mode	72	-3.68269e-05	0.0800037	0.999634	-0.156844	0.15677	0.999963	0.854837	1.16973
inflammatory factors	Oncostatin-M levels	GCST90274831	MR Egger	72	-0.120841	0.0883137	0.175589	-0.293936	0.0522537	0.886175	0.745324	1.05364	105.259	0.00410217	0.0113332	0.00578076	0.0539185	"<0.001"
inflammatory factors			Weighted median	72	0.0440232	0.0422018	0.296874	-0.0386923	0.126739	1.04501	0.962047	1.13512	111.039	0.00168098
inflammatory factors			Inverse variance weighted	72	0.0385722	0.035144	0.272403	-0.0303101	0.107455	1.03933	0.970145	1.11344
inflammatory factors			Simple mode	72	0.104617	0.106997	0.331513	-0.105097	0.314331	1.11029	0.900237	1.36934
inflammatory factors			Weighted mode	72	0.110247	0.114532	0.339023	-0.114236	0.334731	1.11655	0.892047	1.39756
metabolin	Bilirubin (Z,Z) to androsterone glucuronide ratio	GCST90201015	MR Egger	66	0.103985	0.0910858	0.257869	-0.0745435	0.282513	1.10958	0.928167	1.32646	70.2621	0.27595	-0.00572516	0.00609422	0.351036	0.284
metabolin			Weighted median	66	0.0657862	0.0525922	0.210981	-0.0372946	0.168867	1.068	0.963392	1.18396	71.231	0.278262
metabolin			Inverse variance weighted	66	0.0258384	0.0370756	0.485859	-0.0468298	0.0985066	1.02618	0.95425	1.10352
metabolin			Simple mode	66	0.126893	0.127101	0.321804	-0.122224	0.37601	1.1353	0.88495	1.45646
metabolin			Weighted mode	66	0.14035	0.103604	0.180209	-0.0627132	0.343414	1.15068	0.939213	1.40975
metabolin	Glucose-to-mannose ratio	GCST90200953	MR Egger	66	0.0445971	0.0927434	0.632252	-0.13718	0.226374	1.04561	0.871813	1.25404	48.1702	0.929816	-0.00145245	0.00620728	0.815738	0.951
metabolin			Weighted median	66	-0.0105571	0.0560533	0.85061	-0.120422	0.0993074	0.989498	0.886547	1.10441	48.2249	0.940771
metabolin			Inverse variance weighted	66	0.0247798	0.0377955	0.512063	-0.0492994	0.0988589	1.02509	0.951896	1.10391
metabolin			Simple mode	66	0.232301	0.12331	0.0640543	-0.00938545	0.473988	1.2615	0.990658	1.60639
metabolin			Weighted mode	66	-0.051617	0.103727	0.620428	-0.254922	0.151688	0.949693	0.774977	1.1638
metabolin	Glycerol to carnitine ratio	GCST90200929	MR Egger	66	0.0298387	0.0865908	0.731529	-0.139879	0.199557	1.03029	0.869463	1.22086	73.2295	0.201055	-0.00298357	0.00579153	0.608216	0.221
metabolin			Weighted median	66	0.0356982	0.0485149	0.461841	-0.059391	0.130787	1.03634	0.942338	1.13973	73.5331	0.218917
metabolin			Inverse variance weighted	66	-0.0109108	0.0350291	0.755437	-0.0795678	0.0577462	0.989148	0.923515	1.05945
metabolin			Simple mode	66	0.0810286	0.122526	0.510745	-0.159122	0.321179	1.0844	0.852892	1.37875
metabolin			Weighted mode	66	0.0665933	0.0873666	0.448681	-0.104645	0.237832	1.06886	0.900644	1.2685
metabolin	Phosphate to N-palmitoyl-sphingosine (d18:1 to 16:0) ratio	GCST90200827	MR Egger	66	0.152224	0.104271	0.14921	-0.0521461	0.356594	1.16442	0.94919	1.42846	78.9375	0.0989529	-0.0144303	0.00697259	0.042534	0.057
metabolin			Weighted median	66	-0.0372247	0.0596587	0.532653	-0.154156	0.0797063	0.96346	0.857139	1.08297	84.2204	0.0547312
metabolin			Inverse variance weighted	66	-0.0449396	0.0434415	0.300909	-0.130085	0.0402057	0.956055	0.878021	1.04102
metabolin			Simple mode	66	-0.103624	0.149657	0.491144	-0.396951	0.189703	0.901564	0.672367	1.20889
metabolin			Weighted mode	66	-0.00286069	0.122846	0.981493	-0.243639	0.237917	0.997143	0.783771	1.2686
metabolin	Alpha-ketoglutarate to ornithine ratio	GCST90200814	MR Egger	66	-0.0328467	0.0982296	0.739181	-0.225377	0.159683	0.967687	0.798215	1.17314	71.6391	0.239324	-0.000346983	0.0065712	0.958053	0.26
metabolin			Weighted median	66	-0.0106707	0.0557658	0.848252	-0.119972	0.0986303	0.989386	0.886946	1.10366	71.6422	0.267018
metabolin			Inverse variance weighted	66	-0.0375848	0.039664	0.343344	-0.115326	0.0401567	0.963113	0.891075	1.04097
metabolin			Simple mode	66	-0.000527643	0.140049	0.997005	-0.275024	0.273969	0.999472	0.759554	1.31517
metabolin			Weighted mode	66	0.0323738	0.122572	0.792523	-0.207868	0.272616	1.0329	0.812314	1.3134
metabolin	Glutamate to kynurenine ratio	GCST90200812	MR Egger	66	0.0151848	0.0897949	0.866247	-0.160813	0.191183	1.0153	0.851451	1.21068	53.4704	0.823156	-0.00410305	0.00600949	0.497221	0.838
metabolin			Weighted median	66	-0.0261648	0.0517395	0.613066	-0.127574	0.0752447	0.974175	0.880228	1.07815	53.9365	0.834526
metabolin			Inverse variance weighted	66	-0.0408009	0.0365967	0.264902	-0.11253	0.0309286	0.96002	0.89357	1.03141
metabolin			Simple mode	66	-0.0435684	0.127849	0.734369	-0.294153	0.207016	0.957367	0.745162	1.23
metabolin			Weighted mode	66	-0.0435684	0.0968741	0.654392	-0.233442	0.146305	0.957367	0.791804	1.15755
metabolin	Spermidine to choline ratio	GCST90200808	MR Egger	66	-0.00907137	0.0989151	0.927216	-0.202945	0.184802	0.99097	0.816323	1.20298	64.1871	0.469918	0.00617786	0.00661823	0.35409	0.473
metabolin			Weighted median	66	0.0744049	0.0635471	0.241654	-0.0501474	0.198957	1.07724	0.951089	1.22013	65.061	0.474542
metabolin			Inverse variance weighted	66	0.0752641	0.0402296	0.0613641	-0.00358596	0.154114	1.07817	0.99642	1.16662
metabolin			Simple mode	66	0.145728	0.145149	0.319107	-0.138764	0.430221	1.15688	0.870433	1.5376
metabolin			Weighted mode	66	0.123829	0.11095	0.268497	-0.093633	0.341291	1.13182	0.910617	1.40676
metabolin	Adenosine 5'-diphosphate (ADP) to tyrosine ratio	GCST90200732	MR Egger	66	0.223692	0.124943	0.0781271	-0.0211962	0.46858	1.25069	0.979027	1.59772	60.3176	0.607453	-0.0168901	0.00834689	0.0471992	0.519
metabolin			Weighted median	66	0.0402846	0.0783653	0.607209	-0.113311	0.193881	1.04111	0.892873	1.21395	64.4122	0.497267
metabolin			Inverse variance weighted	66	-0.00736391	0.0507203	0.884563	-0.106776	0.0920479	0.992663	0.898727	1.09642
metabolin			Simple mode	66	0.0242387	0.177361	0.891719	-0.323389	0.371867	1.02453	0.723692	1.45044
metabolin			Weighted mode	66	0.089971	0.146551	0.54141	-0.197269	0.377211	1.09414	0.820969	1.45821
metabolin	X-12798 levels	GCST90200709	MR Egger	66	-0.0544267	0.095961	0.572579	-0.24251	0.133657	0.947028	0.784656	1.143	67.9798	0.343326	0.00756844	0.00642085	0.24287	0.337
metabolin			Weighted median	66	0.0435816	0.0571309	0.44556	-0.068395	0.155558	1.04455	0.933892	1.16831	69.4556	0.32983
metabolin			Inverse variance weighted	66	0.0488871	0.0391843	0.212171	-0.0279142	0.125688	1.0501	0.972472	1.13393
metabolin			Simple mode	66	0.0545193	0.138728	0.695611	-0.217389	0.326427	1.05603	0.804617	1.38601
metabolin			Weighted mode	66	-0.00874953	0.108862	0.936188	-0.222118	0.204619	0.991289	0.800821	1.22706
metabolin	X-25217 levels	GCST90200654	MR Egger	66	0.0621659	0.13139	0.637723	-0.195359	0.319691	1.06414	0.822539	1.3767	55.91	0.754279	-0.00512787	0.00880648	0.562422	0.768
metabolin			Weighted median	66	0.0162	0.0808303	0.841152	-0.142227	0.174627	1.01633	0.867424	1.1908	56.2491	0.772089
metabolin			Inverse variance weighted	66	-0.00762195	0.0538413	0.887425	-0.113151	0.0979069	0.992407	0.893016	1.10286
metabolin			Simple mode	66	0.0543968	0.184453	0.769004	-0.307131	0.415925	1.0559	0.735554	1.51577
metabolin			Weighted mode	66	0.0304499	0.150529	0.840324	-0.264586	0.325486	1.03092	0.767524	1.3847
metabolin	X-24494 levels	GCST90200635	MR Egger	66	0.030486	0.101557	0.765008	-0.168566	0.229538	1.03096	0.844875	1.25802	57.6365	0.699441	0.00174397	0.00677756	0.797761	0.733
metabolin			Weighted median	66	0.0617463	0.0625352	0.323454	-0.0608227	0.184315	1.06369	0.94099	1.20239	57.7027	0.727939
metabolin			Inverse variance weighted	66	0.054382	0.0411056	0.185841	-0.026185	0.134949	1.05589	0.974155	1.14448
metabolin			Simple mode	66	0.191649	0.144079	0.188112	-0.0907461	0.474044	1.21125	0.91325	1.60648
metabolin			Weighted mode	66	0.0809193	0.115118	0.484611	-0.144711	0.30655	1.08428	0.865272	1.35873
metabolin	X-23780 levels	GCST90200614	MR Egger	66	0.0199183	0.0945517	0.833822	-0.165403	0.20524	1.02012	0.847552	1.22782	44.3446	0.970974	-0.0032212	0.00632514	0.612315	0.974
metabolin			Weighted median	66	-0.0325855	0.0567481	0.565824	-0.143812	0.0786407	0.96794	0.866051	1.08182	44.6039	0.974994
metabolin			Inverse variance weighted	66	-0.0240655	0.0384819	0.531727	-0.09949	0.0513591	0.976222	0.905299	1.0527
metabolin			Simple mode	66	-0.0565108	0.119425	0.637663	-0.290584	0.177562	0.945056	0.747827	1.1943
metabolin			Weighted mode	66	-0.00714524	0.0987546	0.942543	-0.200704	0.186414	0.99288	0.818154	1.20492
metabolin	X-23587 levels	GCST90200609	MR Egger	66	-0.113748	0.096274	0.241773	-0.302445	0.0749485	0.892482	0.739009	1.07783	59.3848	0.640144	0.00401454	0.00644024	0.535268	0.678
metabolin			Weighted median	66	-0.0461484	0.058746	0.432127	-0.161291	0.0689938	0.9549	0.851045	1.07143	59.7733	0.659974
metabolin			Inverse variance weighted	66	-0.0589288	0.0391747	0.132516	-0.135711	0.0178537	0.942774	0.873095	1.01801
metabolin			Simple mode	66	-0.170127	0.132879	0.204983	-0.430569	0.0903149	0.843558	0.650139	1.09452
metabolin			Weighted mode	66	-0.100139	0.111943	0.374325	-0.319548	0.119269	0.904711	0.726477	1.12667
metabolin	X-22776 levels	GCST90200595	MR Egger	66	0.298601	0.102781	0.00503383	0.0971506	0.500052	1.34797	1.10203	1.64881	65.16	0.436124	-0.0173168	0.00687639	0.0143039	0.274
metabolin			Weighted median	66	0.044817	0.0599988	0.455085	-0.0727806	0.162415	1.04584	0.929805	1.17635	71.6168	0.267706
metabolin			Inverse variance weighted	66	0.0621333	0.043477	0.152973	-0.0230816	0.147348	1.0641	0.977183	1.15876
metabolin			Simple mode	66	-0.000492731	0.143531	0.997271	-0.281814	0.280829	0.999507	0.754414	1.32423
metabolin			Weighted mode	66	-0.0104697	0.117271	0.929135	-0.240321	0.219382	0.989585	0.786375	1.24531
metabolin	X-18922 levels	GCST90200578	MR Egger	66	-0.183045	0.0929303	0.0532038	-0.365188	-0.000901561	0.832731	0.694066	0.999099	61.0442	0.581679	0.0129107	0.00621793	0.0418815	0.457
metabolin			Weighted median	66	0.0193685	0.0570807	0.73437	-0.0925097	0.131247	1.01956	0.91164	1.14025	65.3555	0.464298
metabolin			Inverse variance weighted	66	-0.0068044	0.0379387	0.857661	-0.0811642	0.0675554	0.993219	0.922042	1.06989
metabolin			Simple mode	66	0.111961	0.131848	0.398906	-0.146462	0.370384	1.11847	0.863759	1.44829
metabolin			Weighted mode	66	0.0508233	0.10288	0.622969	-0.150822	0.252469	1.05214	0.860001	1.2872
metabolin	X-21286 levels	GCST90200562	MR Egger	66	0.0335816	0.0931257	0.719583	-0.148945	0.216108	1.03415	0.861617	1.24124	66.5711	0.388566	-0.00520223	0.00622893	0.406728	0.431
metabolin			Weighted median	66	0.0162201	0.0574627	0.777735	-0.0964069	0.128847	1.01635	0.908094	1.13752	67.2967	0.398416
metabolin			Inverse variance weighted	66	-0.0374694	0.0377922	0.321462	-0.111542	0.0366034	0.963224	0.894454	1.03728
metabolin			Simple mode	66	0.0691102	0.124819	0.581694	-0.175534	0.313755	1.07155	0.839009	1.36855
metabolin			Weighted mode	66	0.0602224	0.0975413	0.539125	-0.130959	0.251403	1.06207	0.877254	1.28583
metabolin	X-12812 levels	GCST90200506	MR Egger	66	0.0368956	0.103579	0.722856	-0.166118	0.23991	1.03758	0.846946	1.27113	53.3706	0.825725	-0.00261335	0.0069442	0.707912	0.85
metabolin			Weighted median	66	0.0330125	0.0665393	0.619798	-0.0974044	0.16343	1.03356	0.907189	1.17754	53.5122	0.84482
metabolin			Inverse variance weighted	66	0.00133997	0.0424543	0.974821	-0.0818705	0.0845504	1.00134	0.921391	1.08823
metabolin			Simple mode	66	0.0710719	0.147471	0.63147	-0.217972	0.360116	1.07366	0.804148	1.4335
metabolin			Weighted mode	66	0.0565445	0.119691	0.638209	-0.17805	0.291139	1.05817	0.836901	1.33795
metabolin	X-11483 levels	GCST90200469	MR Egger	66	0.121121	0.0949726	0.206804	-0.0650252	0.307267	1.12876	0.937044	1.3597	46.6316	0.949584	-0.00474368	0.00635366	0.458035	0.95
metabolin			Weighted median	66	0.0525395	0.0560247	0.348352	-0.057269	0.162348	1.05394	0.94434	1.17627	47.1891	0.952851
metabolin			Inverse variance weighted	66	0.0563512	0.0386499	0.144843	-0.0194026	0.132105	1.05797	0.980784	1.14123
metabolin			Simple mode	66	0.0370058	0.128703	0.774623	-0.215252	0.289264	1.0377	0.806338	1.33544
metabolin			Weighted mode	66	0.0790065	0.104464	0.452199	-0.125743	0.283756	1.08221	0.881842	1.32811
metabolin	Lysine levels	GCST90200402	MR Egger	66	-0.0059598	0.092682	0.948929	-0.187617	0.175697	0.994058	0.828933	1.19208	52.8004	0.840012	0.00106265	0.00619857	0.864422	0.849
metabolin			Weighted median	66	-0.022233	0.0549085	0.685544	-0.129854	0.0853877	0.978012	0.878224	1.08914	52.8298	0.860578
metabolin			Inverse variance weighted	66	0.00855593	0.0376918	0.820426	-0.06532	0.0824319	1.00859	0.936768	1.08592
metabolin			Simple mode	66	-0.112374	0.125473	0.37377	-0.358301	0.133553	0.89371	0.698863	1.14288
metabolin			Weighted mode	66	-0.0649857	0.104916	0.537815	-0.270622	0.140651	0.937081	0.762905	1.15102
metabolin	N-acetylputrescine levels	GCST90200351	MR Egger	66	-0.0599932	0.106956	0.576816	-0.269628	0.149641	0.941771	0.763664	1.16142	90.0924	0.0174987	0.00126167	0.00715497	0.860588	0.025
metabolin			Weighted median	66	-0.0566912	0.0564727	0.315442	-0.167378	0.0539954	0.944886	0.84588	1.05548	90.1362	0.0212812
metabolin			Inverse variance weighted	66	-0.0427668	0.0432173	0.322381	-0.127473	0.0419391	0.958135	0.880317	1.04283
metabolin			Simple mode	66	-0.0581454	0.129944	0.656026	-0.312835	0.196544	0.943513	0.731371	1.21719
metabolin			Weighted mode	66	-0.0386391	0.103717	0.710701	-0.241925	0.164646	0.962098	0.785115	1.17898
metabolin	N-stearoyl-sphingosine (d18:1/18:0) levels	GCST90200341	MR Egger	66	-0.0875472	0.115076	0.449582	-0.313095	0.138001	0.916176	0.73118	1.14798	100.085	0.00264023	0.0082464	0.00769889	0.28814	0.003
metabolin			Weighted median	66	-0.00874475	0.0596384	0.883424	-0.125636	0.108146	0.991293	0.881936	1.11421	101.879	0.0023619
metabolin			Inverse variance weighted	66	0.0250317	0.046909	0.593603	-0.06691	0.116973	1.02535	0.935279	1.12409
metabolin			Simple mode	66	0.0124561	0.127875	0.922702	-0.238179	0.263091	1.01253	0.788062	1.30094
metabolin			Weighted mode	66	-0.0159183	0.104621	0.879538	-0.220975	0.189138	0.984208	0.801737	1.20821
metabolin	3-aminoisobutyrate levels	GCST90200310	MR Egger	66	-0.0868966	0.089077	0.332974	-0.261488	0.0876943	0.916772	0.769905	1.09165	63.4331	0.496507	0.00348213	0.00596052	0.56114	0.537
metabolin			Weighted median	66	-0.0445797	0.0555712	0.422432	-0.153499	0.0643398	0.956399	0.857701	1.06645	63.7744	0.519768
metabolin			Inverse variance weighted	66	-0.0393683	0.0362745	0.277794	-0.110466	0.0317297	0.961397	0.895417	1.03224
metabolin			Simple mode	66	-0.038207	0.131762	0.772762	-0.296461	0.220047	0.962514	0.743445	1.24613
metabolin			Weighted mode	66	-0.038207	0.108857	0.726737	-0.251567	0.175153	0.962514	0.777581	1.19143
metabolin	2-aminobutyrate levels	GCST90200305	MR Egger	66	-0.237997	0.0959239	0.015736	-0.426008	-0.049986	0.788205	0.653111	0.951243	67.5959	0.355403	0.0197954	0.00641839	0.00301218	0.118
metabolin			Weighted median	66	-0.021254	0.0563537	0.70606	-0.131707	0.0891993	0.97897	0.876598	1.0933	77.6425	0.135286
metabolin			Inverse variance weighted	66	0.0322107	0.0415389	0.438082	-0.0492055	0.113627	1.03274	0.951986	1.12033
metabolin			Simple mode	66	-0.0440613	0.121511	0.718072	-0.282224	0.194101	0.956895	0.754105	1.21422
metabolin			Weighted mode	66	-0.0440613	0.103332	0.671222	-0.246592	0.15847	0.956895	0.781459	1.17172
metabolin	Bilirubin degradation product, C16H18N2O5 (3) levels	GCST90200271	MR Egger	66	0.0301452	0.0941352	0.749835	-0.15436	0.21465	1.0306	0.856964	1.23943	67.0094	0.374225	-0.00693349	0.00630048	0.27525	0.374
metabolin			Weighted median	66	-0.0191477	0.057311	0.738303	-0.131477	0.0931819	0.981034	0.876799	1.09766	68.2774	0.366542
metabolin			Inverse variance weighted	66	-0.0644585	0.038418	0.0933822	-0.139758	0.0108408	0.937575	0.869569	1.0109
metabolin			Simple mode	66	-0.0547008	0.122331	0.656249	-0.294469	0.185067	0.946768	0.744927	1.2033
metabolin			Weighted mode	66	-0.030429	0.0992154	0.760055	-0.224891	0.164033	0.970029	0.798603	1.17825
metabolin	Palmitoyl-sphingosine-phosphoethanolamine (d18:1/16:0) levels	GCST90200237	MR Egger	66	-0.0383394	0.0918922	0.677913	-0.218448	0.141769	0.962386	0.803765	1.15231	57.4725	0.704829	0.004648	0.00614803	0.452414	0.696
metabolin			Weighted median	66	-0.00733082	0.0594462	0.901855	-0.123845	0.109184	0.992696	0.883516	1.11537	58.0441	0.717103
metabolin			Inverse variance weighted	66	0.0251152	0.0374092	0.501989	-0.0482068	0.0984371	1.02543	0.952937	1.10344
metabolin			Simple mode	66	-0.125318	0.144538	0.38912	-0.408613	0.157977	0.882216	0.664571	1.17114
metabolin			Weighted mode	66	-0.105741	0.113067	0.353143	-0.327352	0.11587	0.899658	0.72083	1.12285
metabolin	Undecenoylcarnitine (C11:1) levels	GCST90200236	MR Egger	66	-0.186433	0.0968475	0.0586737	-0.376254	0.00338784	0.829914	0.686428	1.00339	71.9371	0.231821	0.0152183	0.006479	0.0219303	0.14
metabolin			Weighted median	66	-0.00885457	0.0602853	0.883228	-0.127014	0.109305	0.991185	0.880722	1.1155	78.1385	0.127079
metabolin			Inverse variance weighted	66	0.0213472	0.0407713	0.600567	-0.0585645	0.101259	1.02158	0.943117	1.10656
metabolin			Simple mode	66	-0.111909	0.145891	0.445813	-0.397855	0.174036	0.894125	0.671759	1.1901
metabolin			Weighted mode	66	-0.055734	0.0984468	0.573253	-0.24869	0.137222	0.945791	0.779822	1.14708
metabolin	3-hydroxy-2-methylpyridine sulfate levels	GCST90200225	MR Egger	66	-0.0187496	0.0983095	0.849349	-0.211436	0.173937	0.981425	0.809421	1.18998	65.2086	0.434458	-0.004916	0.00658461	0.458045	0.462
metabolin			Weighted median	66	-0.0672998	0.0575267	0.242046	-0.180052	0.0454525	0.934915	0.835227	1.0465	65.7765	0.449752
metabolin			Inverse variance weighted	66	-0.0857475	0.0400094	0.0320986	-0.164166	-0.00732897	0.917826	0.848601	0.992698
metabolin			Simple mode	66	-0.0638958	0.134565	0.636497	-0.327643	0.199851	0.938103	0.720621	1.22122
metabolin			Weighted mode	66	0.00599027	0.121485	0.960824	-0.23212	0.244101	1.00601	0.792851	1.27647
metabolin	(2,4 or 2,5)-dimethylphenol sulfate levels	GCST90200217	MR Egger	66	-0.0409334	0.137796	0.767385	-0.311014	0.229147	0.959893	0.732704	1.25753	90.0843	0.0175234	0.00390503	0.00923324	0.673763	0.021
metabolin			Weighted median	66	-0.0473901	0.0777861	0.542367	-0.199851	0.105071	0.953715	0.818853	1.11079	90.3361	0.0205709
metabolin			Inverse variance weighted	66	0.0122405	0.0560391	0.827096	-0.0975961	0.122077	1.01232	0.907015	1.12984
metabolin			Simple mode	66	-0.214706	0.162967	0.192303	-0.534122	0.10471	0.806779	0.586184	1.11039
metabolin			Weighted mode	66	-0.145117	0.129191	0.265455	-0.398332	0.108099	0.864922	0.671439	1.11416
metabolin	Glucuronide of piperine metabolite C17H21NO3 (5) levels	GCST90200212	MR Egger	66	0.00662054	0.10738	0.951029	-0.203844	0.217085	1.00664	0.81559	1.24245	68.3002	0.333403	-0.000219572	0.00718995	0.975732	0.374
metabolin			Weighted median	66	-0.00272439	0.0591925	0.96329	-0.118742	0.113293	0.997279	0.888037	1.11996	68.3011	0.365785
metabolin			Inverse variance weighted	66	0.00362521	0.0433688	0.933382	-0.0813777	0.0886281	1.00363	0.921845	1.09267
metabolin			Simple mode	66	-0.0809694	0.131567	0.540423	-0.33884	0.176901	0.922222	0.712596	1.19351
metabolin			Weighted mode	66	-0.075434	0.119227	0.529155	-0.309119	0.158252	0.927341	0.734093	1.17146
metabolin	Ximenoylcarnitine (C26:1) levels	GCST90200149	MR Egger	66	-0.172122	0.091239	0.0637663	-0.35095	0.00670632	0.841876	0.704019	1.00673	58.8877	0.657308	0.0136526	0.0061045	0.028813	0.523
metabolin			Weighted median	66	0.0358863	0.0556616	0.519108	-0.0732105	0.144983	1.03654	0.929405	1.15602	63.8895	0.515699
metabolin			Inverse variance weighted	66	0.01425	0.0371507	0.701295	-0.0585654	0.0870654	1.01435	0.943117	1.09097
metabolin			Simple mode	66	0.0624492	0.14963	0.677793	-0.230826	0.355724	1.06444	0.793878	1.42721
metabolin			Weighted mode	66	0.0867626	0.142991	0.546119	-0.1935	0.367026	1.09064	0.824069	1.44343
metabolin	Cerotoylcarnitine (C26) levels	GCST90200136	MR Egger	66	-0.116081	0.0965363	0.233614	-0.305292	0.0731297	0.890403	0.736908	1.07587	72.7645	0.21179	0.00962258	0.00645638	0.141032	0.176
metabolin			Weighted median	66	0.0278117	0.0572038	0.626835	-0.0843078	0.139931	1.0282	0.919148	1.15019	75.29	0.179672
metabolin			Inverse variance weighted	66	0.0153577	0.0396312	0.698375	-0.0623195	0.0930349	1.01548	0.939583	1.0975
metabolin			Simple mode	66	0.0770275	0.123973	0.53656	-0.16596	0.320015	1.08007	0.84708	1.37715
metabolin			Weighted mode	66	0.0465374	0.0921686	0.615325	-0.134113	0.227188	1.04764	0.874491	1.25507
metabolin	1-(1-enyl-palmitoyl)-2-palmitoleoyl-GPC (P-16:0/16:1) levels	GCST90200070	MR Egger	66	-0.0227038	0.0898643	0.801352	-0.198838	0.15343	0.977552	0.819683	1.16583	43.4749	0.976948	0.00100869	0.00601147	0.867275	0.984
metabolin			Weighted median	66	-0.0466705	0.0530653	0.379134	-0.150679	0.0573375	0.954402	0.860124	1.05901	43.503	0.981485
metabolin			Inverse variance weighted	66	-0.00893004	0.0365682	0.807074	-0.0806038	0.0627437	0.99111	0.922559	1.06475
metabolin			Simple mode	66	-0.0400877	0.127426	0.754077	-0.289843	0.209668	0.960705	0.748381	1.23327
metabolin			Weighted mode	66	-0.0693022	0.108085	0.523658	-0.281148	0.142544	0.933045	0.754917	1.1532
metabolin	N-acetylkynurenine (2) levels	GCST90200015	MR Egger	66	0.0725196	0.110933	0.515632	-0.14491	0.289949	1.07521	0.865101	1.33636	71.903	0.232672	-0.00473318	0.00741802	0.525708	0.268
metabolin			Weighted median	66	0.0175715	0.0645445	0.785439	-0.108936	0.144079	1.01773	0.896788	1.15498	72.3604	0.248044
metabolin			Inverse variance weighted	66	0.00785497	0.0449093	0.861153	-0.0801673	0.0958773	1.00789	0.922962	1.10062
metabolin			Simple mode	66	-0.0703283	0.149233	0.63903	-0.362825	0.222169	0.932088	0.695708	1.24878
metabolin			Weighted mode	66	-0.00207666	0.112977	0.985391	-0.223512	0.219358	0.997925	0.799706	1.24528
metabolin	Arabitol/xylitol levels	GCST90200011	MR Egger	66	0.0601213	0.086389	0.488987	-0.109201	0.229444	1.06197	0.89655	1.2579	63.1283	0.507326	-0.00287245	0.00577901	0.620858	0.534
metabolin			Weighted median	66	0.0196288	0.053101	0.711643	-0.0844492	0.123707	1.01982	0.919018	1.13168	63.3753	0.533894
metabolin			Inverse variance weighted	66	0.0208982	0.0351561	0.552217	-0.0480077	0.0898042	1.02112	0.953126	1.09396
metabolin			Simple mode	66	0.0149992	0.121408	0.902058	-0.22296	0.252959	1.01511	0.800147	1.28783
metabolin			Weighted mode	66	0.0643098	0.0928837	0.491172	-0.117742	0.246362	1.06642	0.888925	1.27936
metabolin	Eugenol sulfate levels	GCST90199986	MR Egger	66	-0.0242548	0.10033	0.809747	-0.220902	0.172393	0.976037	0.801795	1.18814	58.8497	0.658611	-0.00193662	0.006706	0.773676	0.727
metabolin			Weighted median	66	-0.0541784	0.0632702	0.391831	-0.178188	0.0698313	0.947263	0.836785	1.07233	58.9331	0.688162
metabolin			Inverse variance weighted	66	-0.0507341	0.0407304	0.212908	-0.130566	0.0290974	0.950531	0.877599	1.02952
metabolin			Simple mode	66	-0.103794	0.136553	0.449943	-0.371437	0.163849	0.901411	0.689743	1.17804
metabolin			Weighted mode	66	-0.0687432	0.113091	0.545399	-0.290401	0.152915	0.933566	0.747964	1.16523
metabolin	1-oleoyl-GPG (18:1) levels	GCST90199969	MR Egger	66	0.0212709	0.10017	0.832511	-0.175063	0.217605	1.0215	0.839404	1.2431	63.929	0.478987	6.79463e-05	0.00670426	0.991945	0.498
metabolin			Weighted median	66	0.0130387	0.0616573	0.83252	-0.10781	0.133887	1.01312	0.897799	1.14326	63.9291	0.5143
metabolin			Inverse variance weighted	66	0.0221979	0.0408578	0.586927	-0.0578835	0.102279	1.02245	0.94376	1.10769
metabolin			Simple mode	66	-0.0278693	0.144921	0.848101	-0.311914	0.256176	0.972515	0.732044	1.29198
metabolin			Weighted mode	66	-0.11022	0.144694	0.448967	-0.393821	0.173381	0.895637	0.674475	1.18932
metabolin	N-palmitoylglycine levels	GCST90199923	MR Egger	66	-0.0897781	0.0943801	0.345061	-0.274763	0.0952068	0.914134	0.759752	1.09989	69.99	0.283558	0.00535516	0.00631487	0.399585	0.292
metabolin			Weighted median	66	-0.0386827	0.0569156	0.496725	-0.150237	0.0728718	0.962056	0.860504	1.07559	70.7765	0.291005
metabolin			Inverse variance weighted	66	-0.0166772	0.0383473	0.663636	-0.091838	0.0584835	0.983461	0.912253	1.06023
metabolin			Simple mode	66	-0.00205574	0.11893	0.986262	-0.235159	0.231048	0.997946	0.790445	1.25992
metabolin			Weighted mode	66	-0.0515699	0.0984117	0.602045	-0.244457	0.141317	0.949737	0.78313	1.15179
metabolin	Alliin levels	GCST90199919	MR Egger	66	0.170551	0.108678	0.121503	-0.0424571	0.383559	1.18596	0.958432	1.4675	70.4067	0.271955	-0.0111094	0.00727454	0.13165	0.235
metabolin			Weighted median	66	-0.0461365	0.0610432	0.449768	-0.165781	0.0735082	0.954912	0.847232	1.07628	72.9724	0.232554
metabolin			Inverse variance weighted	66	0.0189475	0.0446768	0.671492	-0.0686191	0.106514	1.01913	0.933682	1.11239
metabolin			Simple mode	66	-0.130821	0.147483	0.378337	-0.419889	0.158247	0.877375	0.65712	1.17145
metabolin			Weighted mode	66	-0.0966664	0.122007	0.431066	-0.3358	0.142467	0.907859	0.714766	1.15311
metabolin	4-hydroxy-2-oxoglutaric acid levels	GCST90199897	MR Egger	66	0.00549703	0.0959361	0.954486	-0.182538	0.193532	1.00551	0.833153	1.21353	64.614	0.455009	-0.00162779	0.00641866	0.800616	0.502
metabolin			Weighted median	66	-0.0325802	0.0586665	0.578658	-0.147567	0.0824062	0.967945	0.862805	1.0859	64.6789	0.487903
metabolin			Inverse variance weighted	66	-0.0167265	0.0388585	0.66687	-0.0928892	0.0594361	0.983413	0.911294	1.06124
metabolin			Simple mode	66	-0.0499203	0.1159	0.668099	-0.277085	0.177244	0.951305	0.75799	1.19392
metabolin			Weighted mode	66	-0.0450212	0.0969447	0.643912	-0.235033	0.14499	0.955977	0.790545	1.15603
metabolin	3-hydroxyhippurate levels	GCST90199869	MR Egger	66	0.0611831	0.0968321	0.529738	-0.128608	0.250974	1.06309	0.879319	1.28528	69.2081	0.306079	-0.00540424	0.00647879	0.407303	0.329
metabolin			Weighted median	66	-0.00873417	0.0564417	0.877021	-0.11936	0.101892	0.991304	0.887488	1.10726	69.9606	0.314682
metabolin			Inverse variance weighted	66	-0.0125875	0.0393418	0.749005	-0.0896975	0.0645225	0.987491	0.914208	1.06665
metabolin			Simple mode	66	0.0327626	0.131447	0.803957	-0.224874	0.290399	1.03331	0.798617	1.33696
metabolin			Weighted mode	66	0.0523754	0.10992	0.635325	-0.163067	0.267818	1.05377	0.849534	1.30711
metabolin	Glycosyl-N-stearoyl-sphingosine (d18:1/18:0) levels	GCST90199846	MR Egger	66	-0.191524	0.109984	0.086422	-0.407093	0.0240447	0.8257	0.665583	1.02434	95.9999	0.0059255	0.0146614	0.00735573	0.0505075	0.003
metabolin			Weighted median	66	-0.0508482	0.0548443	0.353856	-0.158343	0.0566467	0.950423	0.853557	1.05828	101.959	0.00232369
metabolin			Inverse variance weighted	66	0.00874996	0.0457375	0.848284	-0.0808956	0.0983955	1.00879	0.92229	1.1034
metabolin			Simple mode	66	-0.130405	0.129987	0.319476	-0.385178	0.124369	0.87774	0.680329	1.13243
metabolin			Weighted mode	66	-0.122463	0.0979681	0.21577	-0.314481	0.0695542	0.884738	0.730168	1.07203
metabolin	Dimethylarginine (sdma + adma) levels	GCST90199832	MR Egger	66	-0.115052	0.0888226	0.199868	-0.289145	0.05904	0.891319	0.748904	1.06082	59.1486	0.648325	0.00904009	0.00594439	0.133241	0.62
metabolin			Weighted median	66	-0.0364912	0.0536291	0.496228	-0.141604	0.0686219	0.964167	0.867965	1.07103	61.4613	0.601564
metabolin			Inverse variance weighted	66	0.00830582	0.0361909	0.81848	-0.0626283	0.0792399	1.00834	0.939293	1.08246
metabolin			Simple mode	66	-0.0673862	0.110933	0.545669	-0.284815	0.150043	0.934834	0.752153	1.16188
metabolin			Weighted mode	66	-0.0804224	0.0924599	0.387606	-0.261644	0.100799	0.922727	0.769785	1.10605
metabolin	Beta-hydroxyisovaleroylcarnitine levels	GCST90199802	MR Egger	66	-0.0947148	0.0942235	0.31858	-0.279393	0.0899633	0.909632	0.756243	1.09413	68.5025	0.327209	0.00924919	0.00630571	0.147328	0.31
metabolin			Weighted median	66	-0.0056887	0.056351	0.919589	-0.116137	0.104759	0.994327	0.890354	1.11044	70.8053	0.290187
metabolin			Inverse variance weighted	66	0.0314962	0.0387349	0.416148	-0.0444242	0.107417	1.032	0.956548	1.1134
metabolin			Simple mode	66	0.0313529	0.132791	0.814092	-0.228917	0.291623	1.03185	0.795395	1.3386
metabolin			Weighted mode	66	-0.026478	0.0963967	0.784435	-0.215416	0.162459	0.973869	0.806206	1.1764
metabolin	2-palmitoyl-GPC (16:0) levels	GCST90199789	MR Egger	66	0.054731	0.0930706	0.558562	-0.127687	0.237149	1.05626	0.880128	1.26763	62.4939	0.529932	-0.00196203	0.00622685	0.753717	0.57
metabolin			Weighted median	66	0.0199165	0.0581147	0.731816	-0.0939882	0.133821	1.02012	0.910293	1.14319	62.5932	0.561614
metabolin			Inverse variance weighted	66	0.0279446	0.037884	0.460736	-0.046308	0.102197	1.02834	0.954748	1.1076
metabolin			Simple mode	66	0.096614	0.134139	0.473952	-0.166299	0.359527	1.10144	0.846793	1.43265
metabolin			Weighted mode	66	-0.0637006	0.118168	0.591681	-0.295309	0.167908	0.938286	0.744301	1.18283
metabolin	1,7-dimethyluric acid levels	GCST90199756	MR Egger	66	-0.0636352	0.102074	0.535225	-0.263701	0.136431	0.938347	0.768203	1.14618	74.4882	0.173879	0.000185041	0.00683303	0.97848	0.194
metabolin			Weighted median	66	-0.0189948	0.0591166	0.747975	-0.134863	0.0968738	0.981184	0.873835	1.10172	74.489	0.196909
metabolin			Inverse variance weighted	66	-0.0611111	0.0412932	0.138892	-0.142046	0.0198236	0.940719	0.867582	1.02002
metabolin			Simple mode	66	-0.0306603	0.13065	0.815199	-0.286735	0.225414	0.969805	0.750711	1.25284
metabolin			Weighted mode	66	-0.0105252	0.0947224	0.911866	-0.196181	0.175131	0.98953	0.821863	1.1914
metabolin	Stearoylcarnitine (C18) levels	GCST90199743	MR Egger	66	-0.178224	0.0934805	0.0610715	-0.361446	0.00499727	0.836755	0.696668	1.00501	66.1546	0.402396	0.0158886	0.00625293	0.0134894	0.225
metabolin			Weighted median	66	0.0103224	0.0558708	0.853422	-0.0991843	0.119829	1.01038	0.905576	1.1273	72.8285	0.236139
metabolin			Inverse variance weighted	66	0.0387793	0.0395785	0.327181	-0.0387945	0.116353	1.03954	0.961948	1.12339
metabolin			Simple mode	66	0.0089765	0.127144	0.943932	-0.240225	0.258178	1.00902	0.786451	1.29457
metabolin			Weighted mode	66	-0.0437367	0.0998907	0.66295	-0.239522	0.152049	0.957206	0.787004	1.16422
metabolin	Xanthurenate levels	GCST90199626	MR Egger	66	-0.0819313	0.0931055	0.382161	-0.264418	0.100555	0.921335	0.767653	1.10579	45.6319	0.960027	0.00623564	0.00623267	0.320848	0.964
metabolin			Weighted median	66	-0.023631	0.0560631	0.673385	-0.133515	0.0862526	0.976646	0.875015	1.09008	46.6328	0.958533
metabolin			Inverse variance weighted	66	0.00311566	0.0379807	0.934621	-0.0713264	0.0775578	1.00312	0.931158	1.08064
metabolin			Simple mode	66	-0.0902094	0.114771	0.434726	-0.31516	0.134741	0.91374	0.729672	1.14424
metabolin			Weighted mode	66	-0.0554661	0.094526	0.559383	-0.240737	0.129805	0.946044	0.786048	1.13861
intestinal flora	Brevibacillaceae abundance in stool	GCST90032245	MR Egger	38	0.0661134	0.77825	0.932771	-1.45926	1.59148	1.06835	0.232409	4.91103	30.3186	0.73522	0.000574509	0.00227851	0.802365	0.789
intestinal flora			Weighted median	38	0.0924761	0.392901	0.813924	-0.67761	0.862563	1.09689	0.507829	2.36922	30.3822	0.770905
intestinal flora			Inverse variance weighted	38	0.249986	0.271806	0.357718	-0.282754	0.782727	1.28401	0.753705	2.18743
intestinal flora			Simple mode	38	-0.173657	0.766632	0.822045	-1.67626	1.32894	0.840585	0.187073	3.77705
intestinal flora			Weighted mode	38	-0.103288	0.634365	0.871546	-1.34664	1.14007	0.901867	0.260112	3.12698
intestinal flora	Brevibacillales abundance in stool	GCST90032246	MR Egger	38	0.0602085	0.713977	0.933263	-1.33919	1.4596	1.06206	0.262059	4.30426	31.9739	0.66056	0.000462125	0.00209033	0.826281	0.69
intestinal flora			Weighted median	38	0.127638	0.359434	0.72251	-0.576854	0.832129	1.13614	0.561663	2.29821	32.0228	0.701348
intestinal flora			Inverse variance weighted	38	0.208113	0.249359	0.403948	-0.280631	0.696857	1.23135	0.755307	2.00743
intestinal flora			Simple mode	38	-0.250026	0.74034	0.737484	-1.70109	1.20104	0.778781	0.182484	3.32357
intestinal flora			Weighted mode	38	-0.182459	0.654466	0.781957	-1.46521	1.10029	0.833219	0.231029	3.00505
intestinal flora	CAG-495 abundance in stool	GCST90032290	MR Egger	38	-4.1879	5.05999	0.413322	-14.1055	5.72968	0.0151782	7.48287e-07	307.872	33.7781	0.574703	0.00586176	0.0148142	0.694673	0.621
intestinal flora			Weighted median	38	-5.05293	2.53823	0.0465104	-10.0279	-0.0780032	0.0063906	4.41529e-05	0.924961	33.9347	0.613532
intestinal flora			Inverse variance weighted	38	-2.31182	1.76722	0.190816	-5.77557	1.15193	0.0990808	0.00310244	3.16428
intestinal flora			Simple mode	38	-4.85576	4.86849	0.325056	-14.398	4.68649	0.00778341	5.58502e-07	108.471
intestinal flora			Weighted mode	38	-5.86792	3.5666	0.108391	-12.8585	1.12263	0.00282876	2.60401e-06	3.07291
intestinal flora	Enorma massiliensis abundance in stool	GCST90032357	MR Egger	38	0.314254	1.69676	0.854106	-3.0114	3.63991	1.36924	0.0492225	38.0885	38.5757	0.353899	-0.00248511	0.00496781	0.619948	0.385
intestinal flora			Weighted median	38	-0.722817	0.864899	0.40331	-2.41802	0.972384	0.485383	0.089098	2.64424	38.8439	0.38661
intestinal flora			Inverse variance weighted	38	-0.481091	0.586565	0.412112	-1.63076	0.668577	0.618109	0.195781	1.95146
intestinal flora			Simple mode	38	-1.73261	1.754	0.329664	-5.17045	1.70523	0.176822	0.00568201	5.50266
intestinal flora			Weighted mode	38	-0.694167	1.31506	0.600747	-3.27168	1.88334	0.49949	0.0379428	6.57545
intestinal flora	Faecalicoccus pleomorphus abundance in stool	GCST90032388	MR Egger	38	-0.598865	2.05089	0.771961	-4.61861	3.42088	0.549435	0.00986648	30.5964	39.8515	0.302698	0.00452737	0.00600447	0.455752	0.319
intestinal flora			Weighted median	38	0.165501	1.02359	0.871553	-1.84074	2.17174	1.17998	0.1587	8.77356	40.4809	0.319314
intestinal flora			Inverse variance weighted	38	0.85013	0.712095	0.232539	-0.545575	2.24584	2.33995	0.579508	9.44831
intestinal flora			Simple mode	38	0.159498	2.17278	0.941878	-4.09916	4.41815	1.17292	0.0165866	82.943
intestinal flora			Weighted mode	38	-1.10894	1.76924	0.534645	-4.57666	2.35877	0.329907	0.0102892	10.578
intestinal flora	Faecalicoccus abundance in stool	GCST90032389	MR Egger	38	-1.15196	2.22101	0.607167	-5.50514	3.20121	0.316016	0.00406584	24.5622	37.7822	0.387816	0.00627623	0.0065025	0.340883	0.381
intestinal flora			Weighted median	38	0.455358	1.11307	0.682466	-1.72627	2.63698	1.57674	0.177948	13.971	38.7599	0.390228
intestinal flora			Inverse variance weighted	38	0.856764	0.774979	0.26893	-0.662196	2.37572	2.35552	0.515718	10.7588
intestinal flora			Simple mode	38	-0.659736	2.37682	0.782887	-5.3183	3.99883	0.516988	0.00490109	54.534
intestinal flora			Weighted mode	38	-1.72155	1.88417	0.366794	-5.41452	1.97142	0.178789	0.00445147	7.18086
intestinal flora	Hydrogenophaga abundance in stool	GCST90032434	MR Egger	38	0.434132	0.914741	0.637942	-1.35876	2.22703	1.54362	0.256979	9.27224	41.5	0.243354	-0.000632861	0.00267809	0.814531	0.293
intestinal flora			Weighted median	38	0.208779	0.449171	0.642068	-0.671596	1.08915	1.23217	0.510892	2.97176	41.5644	0.278581
intestinal flora			Inverse variance weighted	38	0.231581	0.315372	0.46276	-0.386549	0.849711	1.26059	0.679397	2.33897
intestinal flora			Simple mode	38	-0.0740314	0.943263	0.937866	-1.92283	1.77476	0.928643	0.146193	5.89889
intestinal flora			Weighted mode	38	0.0532775	0.776235	0.945649	-1.46814	1.5747	1.05472	0.230353	4.82928
intestinal flora	Negativibacillus abundance in stool	GCST90032490	MR Egger	38	-2.23512	2.41332	0.360529	-6.96522	2.49498	0.106979	0.000944155	12.1215	41.2296	0.252537	0.00361926	0.00706555	0.611612	0.282
intestinal flora			Weighted median	38	-1.82166	1.20271	0.129867	-4.17898	0.535656	0.161757	0.0153142	1.70857	41.5301	0.279822
intestinal flora			Inverse variance weighted	38	-1.07677	0.834408	0.196891	-2.71221	0.55867	0.340695	0.0663901	1.74835
intestinal flora			Simple mode	38	-2.60887	2.42749	0.289458	-7.36675	2.149	0.0736176	0.000631921	8.57631
intestinal flora			Weighted mode	38	-2.99733	2.37511	0.214856	-7.65255	1.65789	0.0499203	0.000474834	5.24822
intestinal flora	Succinivibrio abundance in stool	GCST90032571	MR Egger	38	1.73374	1.93865	0.3771	-2.06601	5.53349	5.66178	0.12669	253.025	29.7813	0.758058	-0.00406595	0.00567588	0.478393	0.781
intestinal flora			Weighted median	38	-0.116191	1.00529	0.907986	-2.08656	1.85418	0.890305	0.124113	6.38645	30.2944	0.774417
intestinal flora			Inverse variance weighted	38	0.432427	0.677072	0.523036	-0.894634	1.75949	1.54099	0.408757	5.80947
intestinal flora			Simple mode	38	-1.84423	2.04749	0.373559	-5.8573	2.16885	0.158148	0.00285896	8.74818
intestinal flora			Weighted mode	38	-1.78312	1.82073	0.333772	-5.35175	1.78552	0.168114	0.00473986	5.96266
intestinal flora	Syntrophorhabdia abundance in stool	GCST90032574	MR Egger	38	-0.0916521	0.761144	0.904825	-1.58349	1.40019	0.912423	0.205257	4.05597	35.2124	0.505863	0.000497215	0.00222841	0.824699	0.575
intestinal flora			Weighted median	38	-0.198738	0.383059	0.603888	-0.949535	0.552058	0.819764	0.386921	1.73682	35.2622	0.550676
intestinal flora			Inverse variance weighted	38	0.067484	0.265831	0.799603	-0.453544	0.588512	1.06981	0.635372	1.80131
intestinal flora			Simple mode	38	1.44533	0.86322	0.102497	-0.246582	3.13724	4.24325	0.781467	23.0402
intestinal flora			Weighted mode	38	-0.20202	0.654694	0.759378	-1.48522	1.08118	0.817079	0.226452	2.94816
intestinal flora	Terrisporobacter othiniensis abundance in stool	GCST90032577	MR Egger	38	-0.157642	2.25954	0.944765	-4.58634	4.27105	0.854155	0.0101901	71.597	43.9475	0.170363	-0.00192485	0.0066153	0.772744	0.195
intestinal flora			Weighted median	38	-0.565934	1.05012	0.589939	-2.62416	1.4923	0.56783	0.0725005	4.44729	44.0509	0.197902
intestinal flora			Inverse variance weighted	38	-0.773699	0.779318	0.320813	-2.30116	0.753765	0.461304	0.100142	2.12499
intestinal flora			Simple mode	38	-2.972	2.33271	0.210588	-7.5441	1.6001	0.0512009	0.000529223	4.95355
intestinal flora			Weighted mode	38	-1.94129	1.94212	0.324011	-5.74785	1.86527	0.143519	0.00318964	6.45771
intestinal flora	UBA6960 abundance in stool	GCST90032622	MR Egger	38	-0.334154	1.21501	0.784872	-2.71558	2.04727	0.715943	0.0661668	7.74671	59.2884	0.00857663	-2.61267e-05	0.00355721	0.99418	0.008
intestinal flora			Weighted median	38	-0.363717	0.501689	0.468461	-1.34703	0.619593	0.695088	0.260012	1.85817	59.2885	0.0114529
intestinal flora			Inverse variance weighted	38	-0.342516	0.418573	0.413189	-1.16292	0.477887	0.709981	0.312572	1.61266
intestinal flora			Simple mode	38	-0.443483	1.01251	0.663932	-2.42801	1.54105	0.641797	0.088212	4.66947
intestinal flora			Weighted mode	38	-0.443483	0.905864	0.627329	-2.21898	1.33201	0.641797	0.10872	3.78865
intestinal flora	Veillonella abundance in stool	GCST90032643	MR Egger	38	1.2773	3.14102	0.686671	-4.8791	7.4337	3.58695	0.00760386	1692.06	30.7911	0.714508	-0.00233785	0.00919604	0.80077	0.743
intestinal flora			Weighted median	38	1.19931	1.5617	0.442516	-1.86162	4.26023	3.31781	0.155421	70.8262	30.8558	0.751559
intestinal flora			Inverse variance weighted	38	0.529065	1.09701	0.629607	-1.62107	2.6792	1.69734	0.197686	14.5735
intestinal flora			Simple mode	38	2.55855	3.19373	0.42818	-3.70117	8.81826	12.917	0.0246946	6756.53
intestinal flora			Weighted mode	38	2.75291	2.79309	0.330725	-2.72155	8.22736	15.6881	0.0657725	3741.96
immunocyte	Activated & secreting CD4 regulatory T cell %CD4 regulatory T cell	ebi-a-GCST90001502	MR Egger	68	-0.0709886	0.0933571	0.449724	-0.253969	0.111991	0.931473	0.775716	1.1185	53.1153	0.873899	0.00609511	0.00689151	0.37967	0.917
immunocyte			Weighted median	68	-0.0100074	0.0946015	0.915753	-0.195426	0.175412	0.990043	0.822484	1.19174	53.8975	0.876323
immunocyte			Inverse variance weighted	68	-0.000582006	0.0487692	0.990478	-0.0961696	0.0950056	0.999418	0.90831	1.09967
immunocyte			Simple mode	68	0.1618	0.160051	0.315687	-0.151899	0.475499	1.17563	0.859075	1.60882
immunocyte			Weighted mode	68	0.0148362	0.0886256	0.867557	-0.15887	0.188542	1.01495	0.853107	1.20749
immunocyte	CD33+ HLA DR+ CD14dim Absolute Count	ebi-a-GCST90001520	MR Egger	67	-0.0830462	0.13469	0.53967	-0.347038	0.180946	0.920309	0.706778	1.19835	46.0908	0.963561	0.00827616	0.0099584	0.408975	0.964
immunocyte			Weighted median	67	-0.0368606	0.123187	0.764769	-0.278307	0.204586	0.96381	0.757064	1.22702	46.7815	0.964874
immunocyte			Inverse variance weighted	67	0.012264	0.0706337	0.862158	-0.126178	0.150706	1.01234	0.881458	1.16265
immunocyte			Simple mode	67	-0.00362202	0.211131	0.986364	-0.417439	0.410195	0.996385	0.658732	1.50711
immunocyte			Weighted mode	67	-0.0286688	0.122069	0.815047	-0.267924	0.210587	0.971738	0.764966	1.2344
immunocyte	Granulocytic Myeloid-Derived Suppressor Cells Absolute Count	ebi-a-GCST90001524	MR Egger	67	0.0197795	0.128508	0.878153	-0.232096	0.271655	1.01998	0.79287	1.31213	51.0322	0.89727	-0.0130336	0.00950084	0.174832	0.855
immunocyte			Weighted median	67	-0.0666343	0.116295	0.56666	-0.294572	0.161304	0.935537	0.74485	1.17504	52.9141	0.87805
immunocyte			Inverse variance weighted	67	-0.130317	0.0674023	0.0531846	-0.262426	0.0017916	0.877817	0.769184	1.00179
immunocyte			Simple mode	67	-0.237285	0.239486	0.325397	-0.706678	0.232108	0.788766	0.49328	1.26126
immunocyte			Weighted mode	67	-0.0433698	0.11634	0.710504	-0.271397	0.184657	0.957557	0.762314	1.20281
immunocyte	CD33dim HLA DR+ CD11b+ Absolute Count	ebi-a-GCST90001525	MR Egger	67	-0.0634638	0.145035	0.663144	-0.347732	0.220804	0.938508	0.706288	1.24708	76.4076	0.15744	-0.00239488	0.0107129	0.823807	0.169
immunocyte			Weighted median	67	0.0283866	0.124495	0.819636	-0.215624	0.272397	1.02879	0.806038	1.31311	76.4664	0.177696
immunocyte			Inverse variance weighted	67	-0.091092	0.0753541	0.22672	-0.238786	0.0566021	0.912934	0.787583	1.05823
immunocyte			Simple mode	67	0.151966	0.243745	0.535129	-0.325775	0.629707	1.16412	0.721968	1.87706
immunocyte			Weighted mode	67	0.0480213	0.118417	0.686401	-0.184076	0.280118	1.04919	0.831873	1.32329
immunocyte	CD4+ CD8dim T cell %lymphocyte	ebi-a-GCST90001610	MR Egger	68	-0.0403716	0.100056	0.687892	-0.236481	0.155738	0.960432	0.789401	1.16852	64.9737	0.512624	0.00513332	0.00740508	0.490606	0.55
immunocyte			Weighted median	68	0.0433419	0.0960758	0.651902	-0.144967	0.23165	1.04429	0.865051	1.26068	65.4543	0.530619
immunocyte			Inverse variance weighted	68	0.018658	0.0525369	0.722485	-0.0843144	0.12163	1.01883	0.919142	1.12934
immunocyte			Simple mode	68	-0.080766	0.170077	0.636418	-0.414117	0.252585	0.92241	0.660923	1.28735
immunocyte			Weighted mode	68	0.0372015	0.0951803	0.697146	-0.149352	0.223755	1.0379	0.861266	1.25076
immunocyte	CD8+ and CD8dim T cell %leukocyte	ebi-a-GCST90001614	MR Egger	68	0.0654559	0.100617	0.517599	-0.131753	0.262665	1.06765	0.876557	1.30039	55.6462	0.814418	-0.00571601	0.00744179	0.44517	0.799
immunocyte			Weighted median	68	0.0769655	0.100487	0.443723	-0.11999	0.273921	1.08	0.886929	1.31511	56.2361	0.8229
immunocyte			Inverse variance weighted	68	-0.000348907	0.0527636	0.994724	-0.103766	0.103068	0.999651	0.901437	1.10857
immunocyte			Simple mode	68	-0.0288142	0.167062	0.863583	-0.356256	0.298627	0.971597	0.700293	1.34801
immunocyte			Weighted mode	68	0.0654152	0.094386	0.490667	-0.119581	0.250412	1.0676	0.887292	1.28455
immunocyte	HLA DR+ CD8+ T cell Absolute Count	ebi-a-GCST90001627	MR Egger	68	0.046357	0.10196	0.650848	-0.153485	0.246199	1.04745	0.857713	1.27915	67.516	0.425081	-0.00488481	0.00753957	0.519303	0.458
immunocyte			Weighted median	68	0.0327867	0.105251	0.755413	-0.173505	0.239078	1.03333	0.840713	1.27008	67.9454	0.444783
immunocyte			Inverse variance weighted	68	-0.00989113	0.0532343	0.852599	-0.11423	0.0944482	0.990158	0.892052	1.09905
immunocyte			Simple mode	68	-0.131697	0.17963	0.466021	-0.483772	0.220378	0.876607	0.616454	1.24655
immunocyte			Weighted mode	68	-0.00326293	0.0917541	0.971738	-0.183101	0.176575	0.996742	0.832684	1.19312
immunocyte	CD28+ CD45RA- CD8dim T cell %T cell	ebi-a-GCST90001667	MR Egger	68	0.0492596	0.0976095	0.615478	-0.142055	0.240574	1.05049	0.867574	1.27198	63.9155	0.549799	-0.00410286	0.00721416	0.571474	0.572
immunocyte			Weighted median	68	0.0577856	0.098293	0.556605	-0.134869	0.25044	1.05949	0.873831	1.28459	64.239	0.573009
immunocyte			Inverse variance weighted	68	0.00196718	0.0511153	0.969301	-0.0982188	0.102153	1.00197	0.906451	1.10755
immunocyte			Simple mode	68	0.0982463	0.156787	0.533036	-0.209056	0.405549	1.10323	0.81135	1.50013
immunocyte			Weighted mode	68	0.0718444	0.089229	0.42357	-0.103044	0.246733	1.07449	0.902087	1.27984
immunocyte	CD28- CD127- CD25++ CD8+ T cell %CD8+ T cell	ebi-a-GCST90001674	MR Egger	68	0.102723	0.103015	0.322325	-0.0991858	0.304632	1.10818	0.905574	1.35613	66.4882	0.460004	-0.00726124	0.00766698	0.347053	0.459
immunocyte			Weighted median	68	0.00387469	0.10106	0.969416	-0.194202	0.201951	1.00388	0.823491	1.22379	67.3918	0.463593
immunocyte			Inverse variance weighted	68	0.0200123	0.0545938	0.713942	-0.0869916	0.127016	1.02021	0.916685	1.13544
immunocyte			Simple mode	68	0.223483	0.175543	0.207383	-0.120581	0.567547	1.25042	0.886405	1.76394
immunocyte			Weighted mode	68	0.0354321	0.0976391	0.71783	-0.15594	0.226805	1.03607	0.85561	1.25458
immunocyte	CD20 on IgD+ CD24+ B cell	ebi-a-GCST90001746	MR Egger	67	-0.0509333	0.101036	0.615887	-0.248963	0.147097	0.950342	0.779609	1.15847	60.3756	0.639363	-0.00013169	0.00745498	0.98596	0.667
immunocyte			Weighted median	67	-0.0159238	0.101892	0.875811	-0.215633	0.183785	0.984202	0.806031	1.20176	60.3759	0.672079
immunocyte			Inverse variance weighted	67	-0.0524556	0.0527456	0.319979	-0.155837	0.0509258	0.948896	0.855699	1.05224
immunocyte			Simple mode	67	0.0600797	0.169948	0.724826	-0.273018	0.393177	1.06192	0.761079	1.48168
immunocyte			Weighted mode	67	-0.00309958	0.0932649	0.973588	-0.185899	0.1797	0.996905	0.830358	1.19686
immunocyte	CD20 on memory B cell	ebi-a-GCST90001758	MR Egger	67	-0.0578978	0.101111	0.568879	-0.256075	0.140279	0.943746	0.774084	1.1506	54.4781	0.820845	0.00450105	0.00746077	0.548412	0.828
immunocyte			Weighted median	67	-0.0283861	0.0982203	0.772578	-0.220898	0.164126	0.972013	0.801799	1.17836	54.8421	0.834748
immunocyte			Inverse variance weighted	67	-0.00587171	0.0527886	0.911433	-0.109337	0.0975939	0.994145	0.896428	1.10251
immunocyte			Simple mode	67	0.0338579	0.181646	0.852707	-0.322169	0.389884	1.03444	0.724576	1.47681
immunocyte			Weighted mode	67	-0.014005	0.0933873	0.881248	-0.197044	0.169034	0.986093	0.821154	1.18416
immunocyte	CD24 on IgD+ CD38- unswitched memory B cell	ebi-a-GCST90001767	MR Egger	67	-0.051025	0.149951	0.734745	-0.344929	0.242879	0.950255	0.708271	1.27491	71.3696	0.274443	0.00569777	0.0110498	0.607852	0.348
immunocyte			Weighted median	67	0.027674	0.142831	0.846369	-0.252275	0.307623	1.02806	0.777031	1.36019	71.6615	0.29563
immunocyte			Inverse variance weighted	67	0.0149723	0.0776914	0.847182	-0.137303	0.167247	1.01508	0.871706	1.18205
immunocyte			Simple mode	67	-0.303526	0.244802	0.219408	-0.783337	0.176285	0.738211	0.456879	1.19278
immunocyte			Weighted mode	67	0.00190027	0.13663	0.988945	-0.265894	0.269695	1.0019	0.76652	1.30956
immunocyte	CD3 on CD28+ CD45RA- CD8+ T cell	ebi-a-GCST90001863	MR Egger	68	0.0938479	0.107493	0.385797	-0.116839	0.304535	1.09839	0.889728	1.35599	54.3244	0.847142	-0.00271464	0.00800485	0.735592	0.883
immunocyte			Weighted median	68	0.0625101	0.108649	0.565061	-0.150442	0.275462	1.06451	0.860328	1.31714	54.4394	0.864951
immunocyte			Inverse variance weighted	68	0.0629519	0.05705	0.269831	-0.0488661	0.17477	1.06498	0.952309	1.19097
immunocyte			Simple mode	68	0.0576661	0.172689	0.739475	-0.280804	0.396136	1.05936	0.755176	1.48607
immunocyte			Weighted mode	68	0.0576661	0.107282	0.592689	-0.152606	0.267938	1.05936	0.858468	1.30727
immunocyte	HVEM on Effector Memory CD8+ T cell	ebi-a-GCST90001873	MR Egger	67	0.417198	0.163969	0.0133326	0.0958185	0.738578	1.5177	1.10056	2.09296	64.2332	0.503569	-0.0264703	0.0122039	0.033746	0.385
immunocyte			Weighted median	67	0.234022	0.159064	0.141225	-0.0777435	0.545787	1.26367	0.925202	1.72597	68.9378	0.378333
immunocyte			Inverse variance weighted	67	0.115786	0.0889511	0.193025	-0.0585582	0.29013	1.12276	0.943123	1.3366
immunocyte			Simple mode	67	0.227257	0.270261	0.403451	-0.302454	0.756968	1.25515	0.739002	2.1318
immunocyte			Weighted mode	67	0.248198	0.171921	0.15356	-0.0887668	0.585162	1.28171	0.915059	1.79528
immunocyte	HVEM on Central Memory CD4+ T cell	ebi-a-GCST90001876	MR Egger	67	0.134945	0.160167	0.402583	-0.178983	0.448874	1.14447	0.83612	1.56655	60.0458	0.650689	-0.00393637	0.0119123	0.742125	0.675
immunocyte			Weighted median	67	0.0446667	0.164904	0.786495	-0.278546	0.367879	1.04568	0.756884	1.44467	60.155	0.679423
immunocyte			Inverse variance weighted	67	0.0900641	0.0848922	0.288725	-0.0763246	0.256453	1.09424	0.926515	1.29234
immunocyte			Simple mode	67	0.139871	0.289176	0.630209	-0.426914	0.706655	1.15012	0.65252	2.0272
immunocyte			Weighted mode	67	0.0631399	0.160799	0.695834	-0.252027	0.378307	1.06518	0.777224	1.45981
immunocyte	HVEM on CD45RA- CD4+ T cell	ebi-a-GCST90001880	MR Egger	67	0.110093	0.162256	0.499852	-0.207928	0.428115	1.11638	0.812266	1.53436	58.8098	0.692231	-0.00318146	0.0120685	0.792909	0.738
immunocyte			Weighted median	67	0.0874985	0.161164	0.587188	-0.228384	0.40338	1.09144	0.795819	1.49688	58.8793	0.720718
immunocyte			Inverse variance weighted	67	0.0738243	0.0860109	0.39072	-0.0947572	0.242406	1.07662	0.909594	1.27431
immunocyte			Simple mode	67	0.174945	0.293893	0.553699	-0.401085	0.750976	1.19118	0.669593	2.11907
immunocyte			Weighted mode	67	0.0922075	0.156859	0.558647	-0.215236	0.399651	1.09659	0.806352	1.4913
immunocyte	HVEM on CD8+ T cell	ebi-a-GCST90001881	MR Egger	67	0.273353	0.160779	0.0938772	-0.041773	0.588479	1.31436	0.959087	1.80125	64.3459	0.499601	-0.0156257	0.0119654	0.196188	0.491
immunocyte			Weighted median	67	0.202992	0.16472	0.21782	-0.119859	0.525842	1.22506	0.887045	1.69188	66.0513	0.475072
immunocyte			Inverse variance weighted	67	0.0954067	0.0853685	0.263744	-0.0719157	0.262729	1.10011	0.930609	1.30047
immunocyte			Simple mode	67	0.297786	0.306382	0.334627	-0.302723	0.898295	1.34687	0.738804	2.45541
immunocyte			Weighted mode	67	0.238368	0.149994	0.116798	-0.0556203	0.532356	1.26918	0.945898	1.70294
immunocyte	CD127 on CD8+ T cell	ebi-a-GCST90001927	MR Egger	68	0.0221403	0.102987	0.830444	-0.179713	0.223994	1.02239	0.83551	1.25106	59.9251	0.687006	-0.000712815	0.00768077	0.92634	0.735
immunocyte			Weighted median	68	0.0545664	0.102591	0.594807	-0.146512	0.255644	1.05608	0.863716	1.29129	59.9337	0.717411
immunocyte			Inverse variance weighted	68	0.0140497	0.0548277	0.797757	-0.0934126	0.121512	1.01415	0.910818	1.1292
immunocyte			Simple mode	68	0.138097	0.180806	0.447678	-0.216283	0.492477	1.14809	0.805507	1.63636
immunocyte			Weighted mode	68	0.0688147	0.0963417	0.477537	-0.120015	0.257644	1.07124	0.886907	1.29388
immunocyte	CD25 on CD45RA- CD4 not regulatory T cell	ebi-a-GCST90001933	MR Egger	68	-0.239158	0.105083	0.0261044	-0.445121	-0.033195	0.787291	0.640747	0.96735	67.3087	0.432057	0.0244099	0.00778172	0.00255138	0.161
immunocyte			Weighted median	68	-0.113474	0.0926864	0.220847	-0.295139	0.0681914	0.892727	0.744428	1.07057	77.3435	0.181879
immunocyte			Inverse variance weighted	68	0.0412005	0.0587984	0.483486	-0.0740444	0.156445	1.04206	0.92863	1.16935
immunocyte			Simple mode	68	0.229666	0.186744	0.223056	-0.136352	0.595684	1.25818	0.872536	1.81427
immunocyte			Weighted mode	68	-0.0880542	0.0974686	0.369544	-0.279093	0.102984	0.915711	0.75647	1.10847
immunocyte	FSC-A on HLA DR+ CD8+ T cell	ebi-a-GCST90001978	MR Egger	68	-0.0616689	0.118378	0.604145	-0.293689	0.170352	0.940194	0.745508	1.18572	87.4826	0.0396213	0.00419701	0.00883065	0.636158	0.057
immunocyte			Weighted median	68	-0.040644	0.0973277	0.67624	-0.231406	0.150118	0.960171	0.793417	1.16197	87.782	0.0451655
immunocyte			Inverse variance weighted	68	-0.0140654	0.0627328	0.822593	-0.137022	0.108891	0.986033	0.871951	1.11504
immunocyte			Simple mode	68	-0.198346	0.178577	0.270666	-0.548357	0.151665	0.820086	0.577899	1.16377
immunocyte			Weighted mode	68	-0.0732992	0.0955245	0.445579	-0.260527	0.113929	0.929323	0.770645	1.12067
immunocyte	PDL-1 on CD14- CD16+ monocyte	ebi-a-GCST90001999	MR Egger	67	0.132133	0.103111	0.20458	-0.0699633	0.33423	1.14126	0.932428	1.39686	63.2276	0.53913	-0.00870514	0.00760583	0.256599	0.553
immunocyte			Weighted median	67	0.0390566	0.0853803	0.647353	-0.128289	0.206402	1.03983	0.879599	1.22925	64.5375	0.52793
immunocyte			Inverse variance weighted	67	0.0314912	0.0538481	0.558671	-0.074051	0.137033	1.03199	0.928624	1.14687
immunocyte			Simple mode	67	-0.0914098	0.163321	0.577582	-0.411518	0.228699	0.912644	0.662643	1.25696
immunocyte			Weighted mode	67	0.0580687	0.100762	0.566377	-0.139426	0.255563	1.05979	0.869858	1.29119
immunocyte	CD45 on CD33+ HLA DR+ CD14dim	ebi-a-GCST90002043	MR Egger	67	0.281209	0.151348	0.0676949	-0.0154333	0.577851	1.32473	0.984685	1.7822	68.3394	0.364565	-0.0193009	0.011244	0.0908238	0.296
immunocyte			Weighted median	67	0.184874	0.141803	0.192321	-0.0930592	0.462808	1.20307	0.91114	1.58853	71.4373	0.302043
immunocyte			Inverse variance weighted	67	0.0608187	0.0813099	0.454468	-0.0985486	0.220186	1.06271	0.906152	1.24631
immunocyte			Simple mode	67	0.203741	0.261965	0.4395	-0.30971	0.717192	1.22598	0.73366	2.04867
immunocyte			Weighted mode	67	0.190869	0.142563	0.185214	-0.0885532	0.470292	1.2103	0.915254	1.60046
immunocyte	CD8 on naive CD8+ T cell	ebi-a-GCST90002055	MR Egger	68	0.185209	0.12269	0.135929	-0.0552647	0.425682	1.20347	0.946235	1.53063	83.7429	0.0692859	-0.014618	0.00914538	0.114732	0.035
immunocyte			Weighted median	68	0.166393	0.101438	0.100934	-0.0324256	0.365212	1.18104	0.968094	1.44082	86.9846	0.0509317
immunocyte			Inverse variance weighted	68	0.0191109	0.0659797	0.772086	-0.110209	0.148431	1.01929	0.895647	1.16001
immunocyte			Simple mode	68	-0.215433	0.221007	0.333176	-0.648607	0.217741	0.806192	0.522773	1.24326
immunocyte			Weighted mode	68	0.125829	0.108953	0.252237	-0.0877185	0.339376	1.13409	0.916019	1.40407
skin flora	Univariate microbial feature (asv: asv016) at the antecubital fossa (moist skin)	GCST90133182	MR Egger	38	1.19941	1.79661	0.508649	-2.32195	4.72077	3.31816	0.098082	112.255	28.9118	0.793165	-0.0829323	0.105686	0.437758	0.797
skin flora			Weighted median	38	-0.386462	0.469532	0.410463	-1.30674	0.53382	0.679457	0.2707	1.70543	29.5276	0.804051
skin flora			Inverse variance weighted	38	-0.186757	0.327692	0.568734	-0.829033	0.455518	0.829645	0.436471	1.57699
skin flora			Simple mode	38	-0.402822	1.0139	0.693429	-2.39006	1.58441	0.668431	0.0916243	4.87644
skin flora			Weighted mode	38	-0.476246	0.881266	0.592152	-2.20353	1.25104	0.621111	0.110413	3.49396
skin flora	Univariate microbial feature (asv: asv057) at the antecubital fossa (moist skin)	GCST90133191	MR Egger	38	-1.46467	2.76442	0.599483	-6.88293	3.95359	0.231154	0.00102514	52.1222	44.2318	0.163053	0.0937598	0.162675	0.567955	0.185
skin flora			Weighted median	38	0.165828	0.677194	0.806554	-1.16147	1.49313	1.18037	0.313025	4.451	44.64	0.181465
skin flora			Inverse variance weighted	38	0.102469	0.494493	0.835838	-0.866738	1.07168	1.1079	0.42032	2.92027
skin flora			Simple mode	38	0.26532	1.46868	0.857627	-2.6133	3.14394	1.30385	0.0732923	23.1951
skin flora			Weighted mode	38	0.26532	1.38821	0.849473	-2.45556	2.9862	1.30385	0.0858148	19.8103
skin flora	Univariate microbial feature (genus: anaerococcus) at the dorsal forearm (dry skin)	GCST90133230	MR Egger	38	-0.273464	1.88711	0.885589	-3.97221	3.42528	0.76074	0.0188318	30.7313	31.7656	0.670248	-0.00463011	0.110818	0.966904	0.694
skin flora			Weighted median	38	-0.242846	0.488136	0.618839	-1.19959	0.713901	0.784392	0.301317	2.04194	31.7673	0.712616
skin flora			Inverse variance weighted	38	-0.351034	0.338114	0.299172	-1.01374	0.31167	0.70396	0.36286	1.3657
skin flora			Simple mode	38	1.04495	1.00825	0.30674	-0.931215	3.02112	2.84327	0.394075	20.5143
skin flora			Weighted mode	38	0.937994	0.892014	0.299827	-0.810354	2.68634	2.55485	0.444701	14.6779
skin flora	Univariate microbial feature (asv: asv086) at the dorsal forearm (dry skin)	GCST90133276	MR Egger	38	1.02719	2.4945	0.682942	-3.86204	5.91641	2.7932	0.0210251	371.079	46.8559	0.106308	-0.0460568	0.14672	0.755401	0.118
skin flora			Weighted median	38	0.124378	0.591937	0.833574	-1.03582	1.28457	1.13244	0.354936	3.61313	46.9842	0.125876
skin flora			Inverse variance weighted	38	0.257084	0.446213	0.564516	-0.617494	1.13166	1.29315	0.539294	3.1008
skin flora			Simple mode	38	0.00642779	1.20135	0.99576	-2.34821	2.36107	1.00645	0.0955399	10.6023
skin flora			Weighted mode	38	0.162774	1.13672	0.886913	-2.06521	2.39075	1.17677	0.126792	10.9217
skin flora	Univariate microbial feature (asv: asv013) at the antecubital fossa (moist skin)	GCST90133169	MR Egger	38	1.41015	1.86643	0.454842	-2.24804	5.06835	4.09658	0.105606	158.912	36.7668	0.433189	-0.0835316	0.11014	0.453142	0.466
skin flora			Weighted median	38	0.0339568	0.46891	0.94227	-0.885106	0.95302	1.03454	0.41267	2.59353	37.3542	0.452805
skin flora			Inverse variance weighted	38	0.0181516	0.336855	0.957026	-0.642083	0.678387	1.01832	0.526195	1.9707
skin flora			Simple mode	38	-0.092773	0.928623	0.92096	-1.91287	1.72733	0.9114	0.147656	5.6256
skin flora			Weighted mode	38	0.0277536	0.823734	0.973304	-1.58677	1.64227	1.02814	0.204586	5.1669
skin flora	Univariate microbial feature (family: neisseriaceae) at the forehead (sebaceous skin)	GCST90133200	MR Egger	38	0.563383	2.35507	0.812291	-4.05255	5.17932	1.7566	0.017378	177.561	69.6126	0.000649909	-0.0136838	0.13914	0.922204	"<0.001"
skin flora			Weighted median	38	0.401768	0.477391	0.400017	-0.533918	1.33745	1.49446	0.586303	3.80933	69.6313	0.000928522
skin flora			Inverse variance weighted	38	0.335707	0.426429	0.431134	-0.500093	1.17151	1.39893	0.606474	3.22685
skin flora			Simple mode	38	0.528782	1.03051	0.610912	-1.49101	2.54858	1.69686	0.225144	12.7889
skin flora			Weighted mode	38	0.528782	0.841405	0.533569	-1.12037	2.17794	1.69686	0.326159	8.82807
skin flora	Univariate microbial feature (asv: asv001) at the forehead (sebaceous skin)	GCST90133203	MR Egger	38	0.939181	1.56755	0.552832	-2.13321	4.01158	2.55789	0.118456	55.2339	26.8637	0.865156	-0.0631361	0.0923985	0.49879	0.872
skin flora			Weighted median	38	-0.325044	0.402991	0.41991	-1.11491	0.464819	0.722496	0.327946	1.59173	27.3306	0.877149
skin flora			Inverse variance weighted	38	-0.113831	0.286941	0.691585	-0.676235	0.448574	0.892409	0.508528	1.56608
skin flora			Simple mode	38	-0.518379	0.862261	0.551382	-2.20841	1.17165	0.595485	0.109875	3.22732
skin flora			Weighted mode	38	-0.396527	0.795683	0.621188	-1.95607	1.16301	0.672652	0.141414	3.19955
skin flora	Univariate microbial feature (class: gammaproteobacteria) at the antecubital fossa (moist skin)	GCST90133287	MR Egger	38	1.87815	1.67142	0.268583	-1.39783	5.15412	6.54138	0.247133	173.144	49.8961	0.0616654	-0.0816017	0.0986329	0.413502	0.062
skin flora			Weighted median	38	0.489091	0.397502	0.218543	-0.290013	1.26819	1.63083	0.748254	3.55443	50.8448	0.0643771
skin flora			Inverse variance weighted	38	0.518277	0.301868	0.0859976	-0.0733844	1.10994	1.67913	0.929244	3.03417
skin flora			Simple mode	38	0.559119	0.926814	0.55001	-1.25744	2.37567	1.74913	0.284382	10.7583
skin flora			Weighted mode	38	0.536458	0.92804	0.566729	-1.2825	2.35542	1.70994	0.277343	10.5425

## Sheet: Supplementary Tables 3
exposure	id.exposure	type	nsnp	BWMR_beta	BWMR_lci95	BWMR_uci95	BWMR_or	BWMR_or_lci95	BWMR_or_uci95	BWMR_pval
(2,4 or 2,5)-dimethylphenol sulfate levels	GCST90200217	metabolin	21	-0.0759173	-0.125596	-0.0262388	0.926893	0.881971	0.974102	0.00274249
1-(1-enyl-palmitoyl)-2-palmitoleoyl-GPC (P-16:0/16:1) levels	GCST90200070	metabolin	34	-0.0393556	-0.0767366	-0.00197449	0.961409	0.926134	0.998027	0.0390625
1-oleoyl-GPG (18:1) levels	GCST90199969	metabolin	25	0.0444828	0.0101863	0.0787792	1.04549	1.01024	1.08197	0.0110177
1,7-dimethyluric acid levels	GCST90199756	metabolin	36	0.059805	0.00866268	0.110947	1.06163	1.0087	1.11734	0.0219061
2-aminobutyrate levels	GCST90200305	metabolin	20	0.0750736	0.0190819	0.131065	1.07796	1.01927	1.14004	0.00858972
2-palmitoyl-GPC (16:0) levels	GCST90199789	metabolin	16	0.0776648	0.00798655	0.147343	1.08076	1.00802	1.15875	0.0289141
3-aminoisobutyrate levels	GCST90200310	metabolin	30	-0.0316843	-0.0581347	-0.00523381	0.968812	0.943523	0.99478	0.0188832
3-hydroxyhippurate levels	GCST90199869	metabolin	19	0.0855798	0.00956196	0.161598	1.08935	1.00961	1.17539	0.0273462
4-hydroxy-2-oxoglutaric acid levels	GCST90199897	metabolin	28	0.0768907	0.0236675	0.130114	1.07992	1.02395	1.13896	0.00463187
Activated & secreting CD4 regulatory T cell %CD4 regulatory T cell	ebi-a-GCST90001502	immunocyte	37	0.00927793	0.000305842	0.01825	1.00932	1.00031	1.01842	0.0426816
Adenosine 5'-diphosphate (ADP) to tyrosine ratio	GCST90200732	metabolin	22	-0.0611745	-0.103133	-0.0192162	0.940659	0.902007	0.980967	0.00426794
Alliin levels	GCST90199919	metabolin	19	-0.0768794	-0.116879	-0.03688	0.926002	0.889693	0.963792	0.000165122
Alpha-ketoglutarate to ornithine ratio	GCST90200814	metabolin	21	0.119319	0.0606447	0.177993	1.12673	1.06252	1.19482	6.72476e-05
Arabitol/xylitol levels	GCST90200011	metabolin	24	-0.0662452	-0.126887	-0.00560351	0.935901	0.880833	0.994412	0.0322651
Beta-hydroxyisovaleroylcarnitine levels	GCST90199802	metabolin	36	0.0458149	0.00503906	0.0865908	1.04688	1.00505	1.09045	0.0276501
Bilirubin (Z,Z) to androsterone glucuronide ratio	GCST90201015	metabolin	32	0.0333551	0.00394615	0.062764	1.03392	1.00395	1.06478	0.026216
Bilirubin degradation product, C16H18N2O5 (3) levels	GCST90200271	metabolin	29	0.0337936	0.0032875	0.0642997	1.03437	1.00329	1.06641	0.0299145
Brevibacillaceae abundance in stool	GCST90032245	intestinal flora	17	0.0136854	0.00308179	0.0242889	1.01378	1.00309	1.02459	0.0114177
Brevibacillales abundance in stool	GCST90032246	intestinal flora	19	0.0186492	0.00743583	0.0298625	1.01882	1.00746	1.03031	0.00111521
C-C motif chemokine 25 levels	GCST90274768	inflammatory factors	35	-0.0285463	-0.0523066	-0.00478593	0.971857	0.949038	0.995226	0.018533
CAG-495 abundance in stool	GCST90032290	intestinal flora	23	0.00132587	0.000113066	0.00253867	1.00133	1.00011	1.00254	0.0321352
CD127 on CD8+ T cell	ebi-a-GCST90001927	immunocyte	24	-0.0326791	-0.0645634	-0.000794744	0.967849	0.937477	0.999206	0.0445526
CD20 on IgD+ CD24+ B cell	ebi-a-GCST90001746	immunocyte	23	0.0310287	0.00170637	0.0603509	1.03152	1.00171	1.06221	0.0380738
CD20 on memory B cell	ebi-a-GCST90001758	immunocyte	28	0.0372217	0.00162315	0.0728202	1.03792	1.00162	1.07554	0.0404262
CD24 on IgD+ CD38- unswitched memory B cell	ebi-a-GCST90001767	immunocyte	21	-0.022849	-0.0425591	-0.0031389	0.97741	0.958334	0.996866	0.0230782
CD25 on CD45RA- CD4 not regulatory T cell	ebi-a-GCST90001933	immunocyte	26	0.0438166	0.0220972	0.0655361	1.04479	1.02234	1.06773	7.68272e-05
CD28- CD127- CD25++ CD8+ T cell %CD8+ T cell	ebi-a-GCST90001674	immunocyte	18	-0.0329121	-0.0625689	-0.00325541	0.967624	0.939348	0.99675	0.029619
CD28+ CD45RA- CD8dim T cell %T cell	ebi-a-GCST90001667	immunocyte	28	0.0108587	0.000951218	0.0207662	1.01092	1.00095	1.02098	0.0316995
CD3 on CD28+ CD45RA- CD8+ T cell	ebi-a-GCST90001863	immunocyte	18	0.030171	0.0022825	0.0580594	1.03063	1.00229	1.05978	0.0339711
CD33+ HLA DR+ CD14dim Absolute Count	ebi-a-GCST90001520	immunocyte	28	-0.021281	-0.0372523	-0.00530965	0.978944	0.963433	0.994704	0.00901196
CD33dim HLA DR+ CD11b+ Absolute Count	ebi-a-GCST90001525	immunocyte	26	-0.0254862	-0.0459122	-0.00506016	0.974836	0.955126	0.994953	0.014463
CD4+ CD8dim T cell %lymphocyte	ebi-a-GCST90001610	immunocyte	19	-0.0442048	-0.0793551	-0.00905457	0.956758	0.923712	0.990986	0.0137056
CD45 on CD33+ HLA DR+ CD14dim	ebi-a-GCST90002043	immunocyte	15	-0.0332107	-0.0626998	-0.00372155	0.967335	0.939225	0.996285	0.0272894
CD8 on naive CD8+ T cell	ebi-a-GCST90002055	immunocyte	16	-0.054496	-0.0898121	-0.0191799	0.946962	0.914103	0.981003	0.00249076
CD8+ and CD8dim T cell %leukocyte	ebi-a-GCST90001614	immunocyte	14	0.0434859	0.00171402	0.0852577	1.04445	1.00172	1.089	0.0413081
Cerotoylcarnitine (C26) levels	GCST90200136	metabolin	30	0.0496624	0.0116673	0.0876575	1.05092	1.01174	1.09161	0.0104112
Dimethylarginine (sdma + adma) levels	GCST90199832	metabolin	21	-0.0646768	-0.123478	-0.00587612	0.93737	0.883841	0.994141	0.0310939
Enorma massiliensis abundance in stool	GCST90032357	intestinal flora	30	-0.00378861	-0.00693182	-0.000645396	0.996219	0.993092	0.999355	0.0181548
Eugenol sulfate levels	GCST90199986	metabolin	23	0.0525239	0.00334779	0.1017	1.05393	1.00335	1.10705	0.0363106
Faecalicoccus abundance in stool	GCST90032389	intestinal flora	17	0.00684753	0.00266168	0.0110334	1.00687	1.00267	1.01109	0.00134446
Faecalicoccus pleomorphus abundance in stool	GCST90032388	intestinal flora	17	0.00479539	0.000291873	0.00929891	1.00481	1.00029	1.00934	0.0368856
FSC-A on HLA DR+ CD8+ T cell	ebi-a-GCST90001978	immunocyte	18	-0.0203826	-0.0390064	-0.00175876	0.979824	0.961745	0.998243	0.0319453
Glucose-to-mannose ratio	GCST90200953	metabolin	26	0.0538626	0.0036636	0.104062	1.05534	1.00367	1.10967	0.0354619
Glucuronide of piperine metabolite C17H21NO3 (5) levels	GCST90200212	metabolin	22	-0.060118	-0.117446	-0.00278954	0.941653	0.889188	0.997214	0.0398431
Glutamate to kynurenine ratio	GCST90200812	metabolin	24	0.0860993	0.029408	0.14279	1.08991	1.02984	1.15349	0.0029134
Glycerol to carnitine ratio	GCST90200929	metabolin	28	-0.0726754	-0.128541	-0.0168093	0.929903	0.879377	0.983331	0.0107804
Glycosyl-N-stearoyl-sphingosine (d18:1/18:0) levels	GCST90199846	metabolin	33	0.0480466	0.00793939	0.0881537	1.04922	1.00797	1.09216	0.018875
Granulocytic Myeloid-Derived Suppressor Cells Absolute Count	ebi-a-GCST90001524	immunocyte	21	0.0293316	0.00361584	0.0550473	1.02977	1.00362	1.05659	0.0253785
Hepatocyte growth factor levels	GCST90274793	inflammatory factors	30	0.0773579	0.0121603	0.142555	1.08043	1.01223	1.15322	0.0200416
HLA DR+ CD8+ T cell Absolute Count	ebi-a-GCST90001627	immunocyte	34	0.023741	0.00441302	0.043069	1.02403	1.00442	1.04401	0.0160616
HVEM on CD45RA- CD4+ T cell	ebi-a-GCST90001880	immunocyte	19	-0.0150698	-0.0291342	-0.00100531	0.985043	0.971286	0.998995	0.0357201
HVEM on CD8+ T cell	ebi-a-GCST90001881	immunocyte	16	-0.0389014	-0.065179	-0.0126237	0.961846	0.9369	0.987456	0.00371289
HVEM on Central Memory CD4+ T cell	ebi-a-GCST90001876	immunocyte	18	-0.0181547	-0.0312699	-0.00503952	0.982009	0.969214	0.994973	0.00666508
HVEM on Effector Memory CD8+ T cell	ebi-a-GCST90001873	immunocyte	18	-0.0279093	-0.0492128	-0.00660578	0.972477	0.951979	0.993416	0.0102359
Hydrogenophaga abundance in stool	GCST90032434	intestinal flora	11	-0.0161261	-0.0290981	-0.00315407	0.984003	0.971321	0.996851	0.0148276
Lysine levels	GCST90200402	metabolin	32	0.0430268	0.00413589	0.0819176	1.04397	1.00414	1.08537	0.0301254
Monocyte chemoattractant protein-1 levels	GCST90274821	inflammatory factors	30	-0.0515803	-0.0960032	-0.00715743	0.949727	0.908461	0.992868	0.0228582
N-acetylkynurenine (2) levels	GCST90200015	metabolin	17	0.0455168	0.00278653	0.088247	1.04657	1.00279	1.09226	0.0368144
N-acetylputrescine levels	GCST90200351	metabolin	23	0.0353509	0.00337731	0.0673246	1.03598	1.00338	1.06964	0.0302325
N-palmitoylglycine levels	GCST90199923	metabolin	19	0.0499364	0.00241111	0.0974617	1.0512	1.00241	1.10237	0.0394524
N-stearoyl-sphingosine (d18:1/18:0) levels	GCST90200341	metabolin	22	0.0738235	0.0141871	0.13346	1.07662	1.01429	1.14278	0.0152548
Negativibacillus abundance in stool	GCST90032490	intestinal flora	11	0.00419746	0.00015923	0.00823568	1.00421	1.00016	1.00827	0.0416216
Oncostatin-M levels	GCST90274831	inflammatory factors	23	0.0759679	0.00717226	0.144764	1.07893	1.0072	1.15577	0.0304383
Palmitoyl-sphingosine-phosphoethanolamine (d18:1/16:0) levels	GCST90200237	metabolin	28	-0.0526831	-0.103377	-0.00198954	0.948681	0.901787	0.998012	0.0416578
PDL-1 on CD14- CD16+ monocyte	ebi-a-GCST90001999	immunocyte	18	0.0335785	0.00458759	0.0625694	1.03415	1.0046	1.06457	0.0231982
Phosphate to N-palmitoyl-sphingosine (d18:1 to 16:0) ratio	GCST90200827	metabolin	24	0.0691703	0.0117007	0.12664	1.07162	1.01177	1.13501	0.0183217
Spermidine to choline ratio	GCST90200808	metabolin	17	0.10735	0.0411463	0.173554	1.11332	1.042	1.18952	0.00148213
Stearoylcarnitine (C18) levels	GCST90199743	metabolin	20	0.0857624	0.0255926	0.145932	1.08955	1.02592	1.15712	0.00521142
Succinivibrio abundance in stool	GCST90032571	intestinal flora	43	-0.00310206	-0.0056154	-0.000588725	0.996903	0.9944	0.999411	0.0155585
Syntrophorhabdia abundance in stool	GCST90032574	intestinal flora	13	0.0144315	0.00209533	0.0267676	1.01454	1.0021	1.02713	0.021853
T-cell surface glycoprotein CD6 isoform levels	GCST90274774	inflammatory factors	24	0.0784549	0.0449667	0.111943	1.08161	1.04599	1.11845	4.39398e-06
Terrisporobacter othiniensis abundance in stool	GCST90032577	intestinal flora	12	-0.00469127	-0.00933655	-4.59948e-05	0.99532	0.990707	0.999954	0.0477702
UBA6960 abundance in stool	GCST90032622	intestinal flora	16	0.0094064	0.000299757	0.018513	1.00945	1.0003	1.01869	0.0429171
Undecenoylcarnitine (C11:1) levels	GCST90200236	metabolin	29	0.0493984	0.00358572	0.095211	1.05064	1.00359	1.09989	0.0345659
Univariate microbial feature (asv: asv001) at the forehead (sebaceous skin)	GCST90133203	skin flora	10	-0.0168216	-0.0327475	-0.000895735	0.983319	0.967783	0.999105	0.03843
Univariate microbial feature (asv: asv013) at the antecubital fossa (moist skin)	GCST90133169	skin flora	4	-0.0337687	-0.0617423	-0.00579523	0.966795	0.940125	0.994222	0.017979
Univariate microbial feature (asv: asv016) at the antecubital fossa (moist skin)	GCST90133182	skin flora	12	0.0156992	0.00302718	0.0283713	1.01582	1.00303	1.02878	0.0151732
Univariate microbial feature (asv: asv057) at the antecubital fossa (moist skin)	GCST90133191	skin flora	13	0.0122909	0.00256084	0.022021	1.01237	1.00256	1.02227	0.0132921
Univariate microbial feature (asv: asv086) at the dorsal forearm (dry skin)	GCST90133276	skin flora	8	0.0138652	0.000762586	0.0269678	1.01396	1.00076	1.02733	0.0380724
Univariate microbial feature (class: gammaproteobacteria) at the antecubital fossa (moist skin)	GCST90133287	skin flora	6	-0.0226164	-0.0422878	-0.00294498	0.977637	0.958594	0.997059	0.0242321
Univariate microbial feature (family: neisseriaceae) at the forehead (sebaceous skin)	GCST90133200	skin flora	7	0.0196406	0.000108206	0.039173	1.01983	1.00011	1.03995	0.0487401
Univariate microbial feature (genus: anaerococcus) at the dorsal forearm (dry skin)	GCST90133230	skin flora	5	0.0318285	0.00306451	0.0605926	1.03234	1.00307	1.06247	0.0300965
Veillonella abundance in stool	GCST90032643	intestinal flora	8	0.00494242	0.00108721	0.00879762	1.00495	1.00109	1.00884	0.0119797
X-11483 levels	GCST90200469	metabolin	25	0.053735	0.00070975	0.10676	1.0552	1.00071	1.11267	0.0470073
X-12798 levels	GCST90200709	metabolin	35	0.0495805	0.0190633	0.0800976	1.05083	1.01925	1.08339	0.00145074
X-12812 levels	GCST90200506	metabolin	18	0.110591	0.0554617	0.16572	1.11694	1.05703	1.18024	8.43064e-05
X-18922 levels	GCST90200578	metabolin	29	0.0664083	0.0276531	0.105163	1.06866	1.02804	1.11089	0.000783601
X-21286 levels	GCST90200562	metabolin	28	0.0689227	0.00900693	0.128838	1.07135	1.00905	1.13751	0.0241559
X-22776 levels	GCST90200595	metabolin	12	-0.085911	-0.16238	-0.00944183	0.917676	0.850118	0.990603	0.0276649
X-23587 levels	GCST90200609	metabolin	25	0.0545809	0.000558059	0.108604	1.0561	1.00056	1.11472	0.0476758
X-23780 levels	GCST90200614	metabolin	26	0.054254	0.00667006	0.101838	1.05575	1.00669	1.1072	0.0254343
X-24494 levels	GCST90200635	metabolin	19	0.0446943	0.000683927	0.0887047	1.04571	1.00068	1.09276	0.0465404
X-25217 levels	GCST90200654	metabolin	14	0.0582992	0.00758882	0.10901	1.06003	1.00762	1.11517	0.0242393
Xanthurenate levels	GCST90199626	metabolin	25	0.0607757	0.00960215	0.111949	1.06266	1.00965	1.11846	0.0199242
Ximenoylcarnitine (C26:1) levels	GCST90200149	metabolin	31	0.0689568	0.0254634	0.11245	1.07139	1.02579	1.11902	0.00188683

## Sheet: Supplementary Tables 4
type	PP.H0.abf	PP.H1.abf	PP.H2.abf	PP.H3.abf	PP.H4.abf	filename	gene
intestinal flora	0.045588	0.00525423	0.83941	0.0967328	0.0130146	GCST90032245.txt.gz	CALCA
intestinal flora	0.0454947	0.0053491	0.837691	0.0984797	0.0129852	GCST90032245.txt.gz	CALCB
intestinal flora	0.879815	0.113363	0.00586336	0.000755285	0.000203584	GCST90032245.txt.gz	HTR1F
intestinal flora	0.0455119	0.00527116	0.838009	0.0970435	0.0141641	GCST90032246.txt.gz	CALCA
intestinal flora	0.0454255	0.00535918	0.836417	0.0986641	0.0141342	GCST90032246.txt.gz	CALCB
intestinal flora	0.876836	0.116335	0.00584351	0.000775082	0.000210453	GCST90032246.txt.gz	HTR1F
intestinal flora	0.036607	0.0143209	0.674043	0.263679	0.01135	GCST90032290.txt.gz	CALCA
intestinal flora	0.0367972	0.0141279	0.677545	0.260124	0.0114055	GCST90032290.txt.gz	CALCB
intestinal flora	0.850842	0.142346	0.00567028	0.000948444	0.000193609	GCST90032290.txt.gz	HTR1F
intestinal flora	0.0468181	0.00397237	0.862059	0.073129	0.0140215	GCST90032357.txt.gz	CALCA
intestinal flora	0.046676	0.00411686	0.859442	0.0757895	0.0139756	GCST90032357.txt.gz	CALCB
intestinal flora	0.881423	0.111763	0.00587408	0.000744627	0.00019539	GCST90032357.txt.gz	HTR1F
intestinal flora	0.0475702	0.00329589	0.875908	0.0606746	0.0125517	GCST90032388.txt.gz	CALCA
intestinal flora	0.0474407	0.00342732	0.873523	0.0630945	0.0125146	GCST90032388.txt.gz	CALCB
intestinal flora	0.751269	0.241773	0.00500669	0.00161091	0.000340826	GCST90032388.txt.gz	HTR1F
intestinal flora	0.0475109	0.00333436	0.874815	0.0613825	0.0129569	GCST90032389.txt.gz	CALCA
intestinal flora	0.0474188	0.00342791	0.87312	0.063105	0.0129287	GCST90032389.txt.gz	CALCB
intestinal flora	0.781888	0.211138	0.00521075	0.00140673	0.000356467	GCST90032389.txt.gz	HTR1F
intestinal flora	0.0443253	0.00560415	0.81616	0.103158	0.0307527	GCST90032434.txt.gz	CALCA
intestinal flora	0.0441912	0.00574344	0.81369	0.105723	0.0306526	GCST90032434.txt.gz	CALCB
intestinal flora	0.875512	0.117589	0.00583469	0.000783371	0.000280503	GCST90032434.txt.gz	HTR1F
intestinal flora	0.0462562	0.00423049	0.851714	0.0778758	0.0199239	GCST90032490.txt.gz	CALCA
intestinal flora	0.0462177	0.00427014	0.851004	0.078606	0.0199027	GCST90032490.txt.gz	CALCB
intestinal flora	0.896799	0.0964164	0.00597655	0.000642383	0.0001661	GCST90032490.txt.gz	HTR1F
intestinal flora	0.0465468	0.00418113	0.857064	0.0769717	0.0152362	GCST90032571.txt.gz	CALCA
intestinal flora	0.0462188	0.00451479	0.851025	0.0831154	0.0151261	GCST90032571.txt.gz	CALCB
intestinal flora	0.89268	0.100479	0.0059491	0.0006694	0.000222208	GCST90032571.txt.gz	HTR1F
intestinal flora	0.0454147	0.00521791	0.836218	0.0960601	0.017089	GCST90032574.txt.gz	CALCA
intestinal flora	0.0453402	0.00529403	0.834847	0.0974616	0.017057	GCST90032574.txt.gz	CALCB
intestinal flora	0.886458	0.106714	0.00590763	0.000710965	0.000209421	GCST90032574.txt.gz	HTR1F
intestinal flora	0.0465259	0.00440122	0.85668	0.0810281	0.0113649	GCST90032577.txt.gz	CALCA
intestinal flora	0.0463031	0.004627	0.852577	0.0851853	0.0113078	GCST90032577.txt.gz	CALCB
intestinal flora	0.884659	0.108472	0.00589564	0.000722637	0.00025113	GCST90032577.txt.gz	HTR1F
intestinal flora	0.0419539	0.00542191	0.772495	0.099753	0.0803767	GCST90032622.txt.gz	CALCA
intestinal flora	0.041942	0.0054359	0.772275	0.100011	0.0803363	GCST90032622.txt.gz	CALCB
intestinal flora	0.857695	0.13534	0.00571595	0.000901603	0.000346875	GCST90032622.txt.gz	HTR1F
intestinal flora	0.0441607	0.00579039	0.81313	0.106588	0.0303311	GCST90032643.txt.gz	CALCA
intestinal flora	0.044087	0.00586712	0.811772	0.108001	0.0302736	GCST90032643.txt.gz	CALCB
intestinal flora	0.862447	0.130665	0.00574761	0.000870523	0.000270182	GCST90032643.txt.gz	HTR1F
intestinal flora	0.926703	0.0704454	0.00254015	0.000192977	0.000118827	GCST90032245.txt.gz	HTR1D
intestinal flora	0.96967	0.0284674	0.00154923	4.52141e-05	0.000267956	GCST90032245.txt.gz	HTR1B
intestinal flora	0.970606	0.0285175	0.000802362	2.35232e-05	5.10517e-05	GCST90032245.txt.gz	CALCRL
intestinal flora	0.80488	0.191878	0.00246051	0.000586372	0.000195386	GCST90032245.txt.gz	CACNA1A
intestinal flora	0.665246	0.332776	0.00120638	0.000603298	0.000168434	GCST90032245.txt.gz	ATP1A2
intestinal flora	0.978412	0.0211639	0.000385034	8.29789e-06	3.07144e-05	GCST90032245.txt.gz	SCN1A
intestinal flora	0.933212	0.06394	0.00255799	0.000175149	0.000114773	GCST90032246.txt.gz	HTR1D
intestinal flora	0.971809	0.026373	0.00155265	4.19126e-05	0.000223184	GCST90032246.txt.gz	HTR1B
intestinal flora	0.971007	0.0281183	0.000802693	2.31952e-05	4.91118e-05	GCST90032246.txt.gz	CALCRL
intestinal flora	0.812195	0.184571	0.00248287	0.000564043	0.000187483	GCST90032246.txt.gz	CACNA1A
intestinal flora	0.727634	0.270412	0.00131951	0.000490228	0.000145183	GCST90032246.txt.gz	ATP1A2
intestinal flora	0.980087	0.0194914	0.000385693	7.64232e-06	2.8109e-05	GCST90032246.txt.gz	SCN1A
intestinal flora	0.947937	0.0492065	0.00259836	0.000134755	0.000123142	GCST90032290.txt.gz	HTR1D
intestinal flora	0.967254	0.0310758	0.00154537	4.95738e-05	7.55305e-05	GCST90032290.txt.gz	HTR1B
intestinal flora	0.969653	0.0294729	0.000801574	2.4316e-05	4.81357e-05	GCST90032290.txt.gz	CALCRL
intestinal flora	0.852586	0.144216	0.00260634	0.000440717	0.000150789	GCST90032290.txt.gz	CACNA1A
intestinal flora	0.86965	0.128404	0.00157705	0.000232716	0.000136094	GCST90032290.txt.gz	ATP1A2
intestinal flora	0.975621	0.0239656	0.000383935	9.41066e-06	2.05041e-05	GCST90032290.txt.gz	SCN1A
intestinal flora	0.945869	0.0513043	0.00259269	0.000140534	9.38515e-05	GCST90032357.txt.gz	HTR1D
intestinal flora	0.929062	0.0692101	0.00148435	0.000110443	0.000133057	GCST90032357.txt.gz	HTR1B
intestinal flora	0.979162	0.0199721	0.000809435	1.64703e-05	3.98411e-05	GCST90032357.txt.gz	CALCRL
intestinal flora	0.534433	0.462339	0.00163375	0.00141319	0.000180676	GCST90032357.txt.gz	CACNA1A
intestinal flora	0.915211	0.0828986	0.00165967	0.00015025	8.08904e-05	GCST90032357.txt.gz	ATP1A2
intestinal flora	0.983364	0.0162232	0.000386983	6.36536e-06	1.89626e-05	GCST90032357.txt.gz	SCN1A
intestinal flora	0.920347	0.0766892	0.00252273	0.000209979	0.000231423	GCST90032388.txt.gz	HTR1D
intestinal flora	0.970949	0.0273785	0.00155127	4.36641e-05	7.80674e-05	GCST90032388.txt.gz	HTR1B
intestinal flora	0.950375	0.0487082	0.000785638	4.01743e-05	9.09513e-05	GCST90032388.txt.gz	CALCRL
intestinal flora	0.907892	0.0889252	0.00277541	0.000271707	0.000135954	GCST90032388.txt.gz	CACNA1A
intestinal flora	0.899467	0.098524	0.00163112	0.000178468	0.000199136	GCST90032388.txt.gz	ATP1A2
intestinal flora	0.963105	0.0364774	0.00037901	1.43301e-05	2.48016e-05	GCST90032388.txt.gz	SCN1A
intestinal flora	0.917605	0.079427	0.00251522	0.00021748	0.000234833	GCST90032389.txt.gz	HTR1D
intestinal flora	0.971146	0.0271798	0.00155159	4.33456e-05	7.92114e-05	GCST90032389.txt.gz	HTR1B
intestinal flora	0.951811	0.0472622	0.000786825	3.89688e-05	0.00010101	GCST90032389.txt.gz	CALCRL
intestinal flora	0.904383	0.0924318	0.00276469	0.000282424	0.000138548	GCST90032389.txt.gz	CACNA1A
intestinal flora	0.89875	0.0992441	0.00162982	0.000179776	0.000196009	GCST90032389.txt.gz	ATP1A2
intestinal flora	0.965631	0.0339525	0.000380004	1.3338e-05	2.33064e-05	GCST90032389.txt.gz	SCN1A
intestinal flora	0.954722	0.0424586	0.00261695	0.000116296	8.59488e-05	GCST90032434.txt.gz	HTR1D
intestinal flora	0.948399	0.049923	0.00151524	7.96781e-05	8.31424e-05	GCST90032434.txt.gz	HTR1B
intestinal flora	0.976981	0.0221467	0.000807632	1.82614e-05	4.64328e-05	GCST90032434.txt.gz	CALCRL
intestinal flora	0.277296	0.718969	0.000847691	0.00219719	0.000689503	GCST90032434.txt.gz	CACNA1A
intestinal flora	0.805775	0.192297	0.00146122	0.000348598	0.000118854	GCST90032434.txt.gz	ATP1A2
intestinal flora	0.987565	0.0120285	0.000388636	4.72072e-06	1.28483e-05	GCST90032434.txt.gz	SCN1A
intestinal flora	0.951791	0.0453686	0.00260892	0.000124251	0.00010709	GCST90032490.txt.gz	HTR1D
intestinal flora	0.867904	0.130363	0.00138664	0.000208142	0.000137733	GCST90032490.txt.gz	HTR1B
intestinal flora	0.971667	0.0274656	0.000803239	2.26632e-05	4.15537e-05	GCST90032490.txt.gz	CALCRL
intestinal flora	0.902747	0.0940612	0.00275969	0.000287399	0.000145014	GCST90032490.txt.gz	CACNA1A
intestinal flora	0.923931	0.0741856	0.00167549	0.000134457	7.36347e-05	GCST90032490.txt.gz	ATP1A2
intestinal flora	0.986045	0.0135449	0.000388038	5.31385e-06	1.64457e-05	GCST90032490.txt.gz	SCN1A
intestinal flora	0.952122	0.0450469	0.00260983	0.000123379	9.77237e-05	GCST90032571.txt.gz	HTR1D
intestinal flora	0.954982	0.0433239	0.00152576	6.91187e-05	9.92688e-05	GCST90032571.txt.gz	HTR1B
intestinal flora	0.978614	0.0205232	0.000808982	1.69284e-05	3.73338e-05	GCST90032571.txt.gz	CALCRL
intestinal flora	0.860161	0.136655	0.0026295	0.000417617	0.000136304	GCST90032571.txt.gz	CACNA1A
intestinal flora	0.847481	0.150581	0.00153685	0.000272941	0.000127725	GCST90032571.txt.gz	ATP1A2
intestinal flora	0.982405	0.0171838	0.000386605	6.74441e-06	1.79114e-05	GCST90032571.txt.gz	SCN1A
intestinal flora	0.926672	0.0704887	0.00254007	0.000193108	0.000105936	GCST90032574.txt.gz	HTR1D
intestinal flora	0.958533	0.0397627	0.00153143	6.34188e-05	0.000109637	GCST90032574.txt.gz	HTR1B
intestinal flora	0.974837	0.0242884	0.000805859	2.00291e-05	4.91525e-05	GCST90032574.txt.gz	CALCRL
intestinal flora	0.893927	0.102888	0.00273272	0.000314388	0.00013806	GCST90032574.txt.gz	CACNA1A
intestinal flora	0.875101	0.122919	0.00158694	0.000222736	0.000169821	GCST90032574.txt.gz	ATP1A2
intestinal flora	0.985109	0.0144815	0.000387669	5.68325e-06	1.56619e-05	GCST90032574.txt.gz	SCN1A
intestinal flora	0.947626	0.049497	0.0025975	0.00013553	0.000144374	GCST90032577.txt.gz	HTR1D
intestinal flora	0.971895	0.0264239	0.00155278	4.2131e-05	8.60732e-05	GCST90032577.txt.gz	HTR1B
intestinal flora	0.957248	0.0418714	0.000791319	3.45585e-05	5.49304e-05	GCST90032577.txt.gz	CALCRL
intestinal flora	0.898393	0.0984479	0.00274638	0.000300842	0.000112058	GCST90032577.txt.gz	CACNA1A
intestinal flora	0.869296	0.128774	0.00157641	0.000233402	0.000120144	GCST90032577.txt.gz	ATP1A2
intestinal flora	0.98708	0.0125147	0.000388445	4.91282e-06	1.20832e-05	GCST90032577.txt.gz	SCN1A
intestinal flora	0.949697	0.0474781	0.00260318	0.000130049	9.13424e-05	GCST90032622.txt.gz	HTR1D
intestinal flora	0.968238	0.0300557	0.00154694	4.79083e-05	0.00011129	GCST90032622.txt.gz	HTR1B
intestinal flora	0.975431	0.0237009	0.00080635	1.95501e-05	4.25136e-05	GCST90032622.txt.gz	CALCRL
intestinal flora	0.842233	0.15452	0.00257469	0.000472165	0.000200579	GCST90032622.txt.gz	CACNA1A
intestinal flora	0.879528	0.118547	0.00159496	0.000214861	0.000115369	GCST90032622.txt.gz	ATP1A2
intestinal flora	0.977447	0.0221346	0.000384654	8.68583e-06	2.48002e-05	GCST90032622.txt.gz	SCN1A
intestinal flora	0.946675	0.0504956	0.0025949	0.000138316	9.58143e-05	GCST90032643.txt.gz	HTR1D
intestinal flora	0.961373	0.0369254	0.00153597	5.88883e-05	0.000106811	GCST90032643.txt.gz	HTR1B
intestinal flora	0.979648	0.0194893	0.000809837	1.60744e-05	3.66005e-05	GCST90032643.txt.gz	CALCRL
intestinal flora	0.8841	0.112679	0.00270268	0.000344286	0.000173668	GCST90032643.txt.gz	CACNA1A
intestinal flora	0.892497	0.105577	0.00161848	0.000191339	0.000116821	GCST90032643.txt.gz	ATP1A2
intestinal flora	0.981508	0.0180795	0.000386252	7.09612e-06	1.86962e-05	GCST90032643.txt.gz	SCN1A
metabolin	0.628814	0.115418	0.199973	0.0366856	0.0191091	GCST90199626	CALCA
metabolin	0.624604	0.117231	0.201485	0.0377974	0.0188823	GCST90199626	CALCB
metabolin	0.589123	0.174827	0.172255	0.0511052	0.0126905	GCST90199626	HTR1F
metabolin	0.420805	0.329414	0.133823	0.104748	0.01121	GCST90199743	CALCA
metabolin	0.475812	0.271308	0.153488	0.0875066	0.0118861	GCST90199743	CALCB
metabolin	0.584133	0.179682	0.170832	0.0525358	0.0128172	GCST90199743	HTR1F
metabolin	0.610879	0.138024	0.194269	0.0438809	0.0129474	GCST90199756	CALCA
metabolin	0.608265	0.138028	0.196214	0.0445122	0.0129801	GCST90199756	CALCB
metabolin	0.580785	0.184007	0.169853	0.0538021	0.0115527	GCST90199756	HTR1F
metabolin	0.623576	0.12534	0.198308	0.0398474	0.0129284	GCST90199789	CALCA
metabolin	0.620631	0.125441	0.200203	0.0404515	0.0132729	GCST90199789	CALCB
metabolin	0.455894	0.30784	0.133328	0.090016	0.0129223	GCST90199789	HTR1F
metabolin	0.632284	0.116562	0.201077	0.0370556	0.0130213	GCST90199802	CALCA
metabolin	0.628981	0.117268	0.202897	0.0378152	0.0130387	GCST90199802	CALCB
metabolin	0.547702	0.215665	0.160178	0.0630586	0.0133968	GCST90199802	HTR1F
metabolin	0.620158	0.12827	0.19722	0.0407784	0.0135734	GCST90199832	CALCA
metabolin	0.602859	0.143113	0.19447	0.0461521	0.0134057	GCST90199832	CALCB
metabolin	0.57871	0.185586	0.169246	0.0542632	0.012195	GCST90199832	HTR1F
metabolin	0.616334	0.132509	0.196004	0.0421271	0.0130256	GCST90199846	CALCA
metabolin	0.606165	0.140107	0.195537	0.0451829	0.0130082	GCST90199846	CALCB
metabolin	0.596106	0.16774	0.174334	0.0490435	0.0127764	GCST90199846	HTR1F
metabolin	0.626727	0.122281	0.19931	0.0388745	0.0128083	GCST90199869	CALCA
metabolin	0.625002	0.121312	0.201613	0.03912	0.0129519	GCST90199869	CALCB
metabolin	0.564481	0.199414	0.165085	0.0583067	0.0127141	GCST90199869	HTR1F
metabolin	0.629594	0.119475	0.200221	0.0379822	0.012728	GCST90199897	CALCA
metabolin	0.624829	0.121439	0.201558	0.0391609	0.0130127	GCST90199897	CALCB
metabolin	0.541915	0.219964	0.158485	0.064314	0.0153219	GCST90199897	HTR1F
metabolin	0.598918	0.147502	0.19038	0.0468705	0.0163304	GCST90199919	CALCA
metabolin	0.598919	0.144574	0.193113	0.0465992	0.0167948	GCST90199919	CALCB
metabolin	0.479923	0.279517	0.140314	0.0817034	0.0185423	GCST90199919	HTR1F
metabolin	0.620756	0.1272	0.197411	0.0404375	0.0141959	GCST90199923	CALCA
metabolin	0.601447	0.14269	0.194015	0.0460131	0.015835	GCST90199923	CALCB
metabolin	0.599644	0.164425	0.175368	0.0480742	0.0124882	GCST90199923	HTR1F
metabolin	0.624362	0.122013	0.198495	0.0387736	0.0163562	GCST90199969	CALCA
metabolin	0.621426	0.122297	0.200398	0.039422	0.0164562	GCST90199969	CALCB
metabolin	0.554257	0.210381	0.162016	0.0614852	0.0118605	GCST90199969	HTR1F
metabolin	0.613249	0.135343	0.194963	0.0430146	0.0134305	GCST90199986	CALCA
metabolin	0.610072	0.135889	0.196737	0.043808	0.013494	GCST90199986	CALCB
metabolin	0.579199	0.185445	0.169389	0.0542223	0.0117449	GCST90199986	HTR1F
metabolin	0.624311	0.124382	0.198541	0.0395423	0.0132231	GCST90200011	CALCA
metabolin	0.621455	0.124551	0.200469	0.0401645	0.0133601	GCST90200011	CALCB
metabolin	0.591131	0.173334	0.172878	0.0506801	0.0119772	GCST90200011	HTR1F
metabolin	0.621899	0.12198	0.197774	0.0387719	0.019576	GCST90200015	CALCA
metabolin	0.612062	0.128558	0.197439	0.0414499	0.020491	GCST90200015	CALCB
metabolin	0.583298	0.180993	0.170433	0.0528717	0.0124043	GCST90200015	HTR1F
metabolin	0.613607	0.133885	0.195137	0.0425628	0.0148078	GCST90200070	CALCA
metabolin	0.613058	0.131944	0.19776	0.0425478	0.0146893	GCST90200070	CALCB
metabolin	0.570086	0.193512	0.166724	0.0565802	0.0130976	GCST90200070	HTR1F
metabolin	0.617962	0.131323	0.196522	0.0417504	0.0124428	GCST90200136	CALCA
metabolin	0.615405	0.131278	0.198517	0.0423351	0.0124648	GCST90200136	CALCB
metabolin	0.422247	0.342994	0.123488	0.100299	0.0109718	GCST90200136	HTR1F
metabolin	0.618705	0.130671	0.196759	0.0415433	0.0123216	GCST90200149	CALCA
metabolin	0.618536	0.128159	0.199528	0.0413291	0.0124481	GCST90200149	CALCB
metabolin	0.58139	0.183283	0.17003	0.0535902	0.0117062	GCST90200149	HTR1F
metabolin	0.616308	0.131406	0.195935	0.0417616	0.014589	GCST90200212	CALCA
metabolin	0.613383	0.131681	0.197805	0.0424498	0.0146816	GCST90200212	CALCB
metabolin	0.576978	0.186812	0.168701	0.0546086	0.0128999	GCST90200212	HTR1F
metabolin	0.595028	0.148012	0.189144	0.0470284	0.0207873	GCST90200217	CALCA
metabolin	0.59235	0.148152	0.190995	0.0477491	0.0207536	GCST90200217	CALCB
metabolin	0.548705	0.2154	0.160048	0.0628157	0.0130303	GCST90200217	HTR1F
metabolin	0.595713	0.153598	0.189447	0.0488344	0.0124076	GCST90200236	CALCA
metabolin	0.5988	0.147806	0.193161	0.0476666	0.0125672	GCST90200236	CALCB
metabolin	0.578066	0.18618	0.169058	0.0544369	0.0122588	GCST90200236	HTR1F
metabolin	0.61668	0.131514	0.196115	0.0418099	0.0138808	GCST90200237	CALCA
metabolin	0.591022	0.153537	0.190652	0.0495127	0.0152769	GCST90200237	CALCB
metabolin	0.477218	0.283981	0.139564	0.0830351	0.0162012	GCST90200237	HTR1F
metabolin	0.630796	0.117988	0.200604	0.0375089	0.0131041	GCST90200271	CALCA
metabolin	0.619113	0.127174	0.199714	0.0410109	0.0129881	GCST90200271	CALCB
metabolin	0.572328	0.192325	0.167344	0.0562225	0.0117801	GCST90200271	HTR1F
metabolin	0.601068	0.146734	0.19115	0.0466495	0.0143985	GCST90200305	CALCA
metabolin	0.596706	0.148547	0.192486	0.047904	0.0143576	GCST90200305	CALCB
metabolin	0.590488	0.174201	0.172691	0.0509342	0.0116855	GCST90200305	HTR1F
metabolin	0.626976	0.121552	0.199389	0.0386422	0.0134407	GCST90200310	CALCA
metabolin	0.627285	0.118604	0.20235	0.0382457	0.0135156	GCST90200310	CALCB
metabolin	0.422341	0.339773	0.123515	0.0993529	0.0150182	GCST90200310	HTR1F
metabolin	0.563356	0.185357	0.179157	0.0589334	0.0131967	GCST90200341	CALCA
metabolin	0.597457	0.149259	0.192728	0.0481356	0.0124204	GCST90200341	CALCB
metabolin	0.596497	0.168285	0.174448	0.0492041	0.0115659	GCST90200341	HTR1F
metabolin	0.613728	0.133462	0.195176	0.042428	0.0152067	GCST90200351	CALCA
metabolin	0.613148	0.13147	0.19779	0.0423945	0.0151974	GCST90200351	CALCB
metabolin	0.585072	0.179356	0.171107	0.0524413	0.0120237	GCST90200351	HTR1F
metabolin	0.623965	0.12504	0.198431	0.0397521	0.0128119	GCST90200402	CALCA
metabolin	0.618762	0.127569	0.1996	0.0411383	0.0129307	GCST90200402	CALCB
metabolin	0.555501	0.206429	0.162458	0.0603557	0.0152558	GCST90200402	HTR1F
metabolin	0.593302	0.15324	0.188621	0.0487016	0.0161349	GCST90200469	CALCA
metabolin	0.562543	0.170015	0.181409	0.0547953	0.0312379	GCST90200469	CALCB
metabolin	0.591496	0.172409	0.172904	0.050385	0.0128061	GCST90200469	HTR1F
metabolin	0.579801	0.153169	0.184329	0.0486611	0.0340394	GCST90200506	CALCA
metabolin	0.573427	0.157124	0.18492	0.0506357	0.0338932	GCST90200506	CALCB
metabolin	0.519294	0.245396	0.151771	0.0717087	0.0118305	GCST90200506	HTR1F
metabolin	0.529989	0.205073	0.168545	0.0651854	0.0312071	GCST90200562	CALCA
metabolin	0.538359	0.195044	0.173664	0.0628872	0.0300457	GCST90200562	CALCB
metabolin	0.592268	0.172052	0.173211	0.0503051	0.0121642	GCST90200562	HTR1F
metabolin	0.598827	0.148735	0.190437	0.0472856	0.0147157	GCST90200578	CALCA
metabolin	0.593622	0.151236	0.191491	0.0487708	0.0148802	GCST90200578	CALCB
metabolin	0.562354	0.202114	0.164463	0.0590969	0.0119725	GCST90200578	HTR1F
metabolin	0.615922	0.131392	0.19577	0.0417477	0.0151677	GCST90200595	CALCA
metabolin	0.614079	0.1305	0.198029	0.0420685	0.0153236	GCST90200595	CALCB
metabolin	0.578707	0.186128	0.169163	0.0543961	0.0116052	GCST90200595	HTR1F
metabolin	0.599	0.144769	0.190492	0.0460192	0.0197204	GCST90200609	CALCA
metabolin	0.56889	0.160205	0.183513	0.0516431	0.0357491	GCST90200609	CALCB
metabolin	0.577842	0.186089	0.168954	0.0543972	0.0127181	GCST90200609	HTR1F
metabolin	0.604102	0.145185	0.192055	0.0461443	0.0125138	GCST90200614	CALCA
metabolin	0.601384	0.145238	0.193935	0.0468239	0.0126192	GCST90200614	CALCB
metabolin	0.600432	0.16422	0.175599	0.0480149	0.0117353	GCST90200614	HTR1F
metabolin	0.514662	0.222425	0.16362	0.0706842	0.0286091	GCST90200635	CALCA
metabolin	0.514547	0.220148	0.165932	0.070965	0.0284084	GCST90200635	CALCB
metabolin	0.596398	0.1684	0.174261	0.0491927	0.0117483	GCST90200635	HTR1F
metabolin	0.608773	0.136647	0.19354	0.0434249	0.0176155	GCST90200654	CALCA
metabolin	0.605796	0.137248	0.195358	0.0442427	0.0173548	GCST90200654	CALCB
metabolin	0.470785	0.29192	0.137846	0.0854602	0.0139889	GCST90200654	HTR1F
metabolin	0.569171	0.147924	0.181006	0.0469874	0.0549117	GCST90200709	CALCA
metabolin	0.560451	0.155216	0.180791	0.050016	0.0535264	GCST90200709	CALCB
metabolin	0.577373	0.183341	0.168865	0.053605	0.016816	GCST90200709	HTR1F
metabolin	0.499107	0.249188	0.15878	0.07926	0.0136655	GCST90200732	CALCA
metabolin	0.488695	0.256735	0.157684	0.0828247	0.0140615	GCST90200732	CALCB
metabolin	0.569538	0.194286	0.166504	0.0567867	0.0128841	GCST90200732	HTR1F
metabolin	0.623108	0.124804	0.198159	0.0396756	0.0142534	GCST90200808	CALCA
metabolin	0.619563	0.125717	0.199859	0.0405394	0.0143219	GCST90200808	CALCB
metabolin	0.58332	0.180703	0.170594	0.0528347	0.0125479	GCST90200808	HTR1F
metabolin	0.632638	0.116619	0.201189	0.0370744	0.0124796	GCST90200812	CALCA
metabolin	0.62777	0.118847	0.202506	0.038325	0.0125527	GCST90200812	CALCB
metabolin	0.519413	0.241874	0.151904	0.0707209	0.0160876	GCST90200812	HTR1F
metabolin	0.593139	0.155079	0.188628	0.0493038	0.0138498	GCST90200814	CALCA
metabolin	0.589107	0.156493	0.190034	0.0504678	0.0138975	GCST90200814	CALCB
metabolin	0.560511	0.203753	0.163924	0.059576	0.0122365	GCST90200814	HTR1F
metabolin	0.620631	0.128184	0.197371	0.0407516	0.0130624	GCST90200827	CALCA
metabolin	0.61911	0.127088	0.199713	0.040983	0.0131067	GCST90200827	CALCB
metabolin	0.562828	0.201416	0.164601	0.0588926	0.0122619	GCST90200827	HTR1F
metabolin	0.6113	0.129508	0.194404	0.0411621	0.0236261	GCST90200929	CALCA
metabolin	0.607121	0.131419	0.195845	0.0423701	0.0232449	GCST90200929	CALCB
metabolin	0.574321	0.189735	0.167962	0.0554761	0.0125056	GCST90200929	HTR1F
metabolin	0.612649	0.135771	0.194833	0.0431638	0.013583	GCST90200953	CALCA
metabolin	0.605054	0.140754	0.195178	0.0453907	0.0136233	GCST90200953	CALCB
metabolin	0.579074	0.184892	0.169352	0.0540598	0.0126213	GCST90200953	HTR1F
metabolin	0.626229	0.12228	0.199089	0.0388614	0.0135397	GCST90201015	CALCA
metabolin	0.624884	0.121099	0.201513	0.0390388	0.0134647	GCST90201015	CALCB
metabolin	0.571245	0.191933	0.167025	0.056105	0.0136925	GCST90201015	HTR1F
metabolin	0.71776	0.130036	0.120696	0.0218567	0.00965189	GCST90199626	HTR1D
metabolin	0.666165	0.165767	0.127486	0.0317145	0.00886812	GCST90199626	HTR1B
metabolin	0.650061	0.18581	0.120584	0.034458	0.00908703	GCST90199626	CALCRL
metabolin	0.018355	0.00555652	0.735995	0.222787	0.0173067	GCST90199626	CACNA1A
metabolin	0.547598	0.214931	0.162127	0.0636227	0.0117213	GCST90199626	ATP1A2
metabolin	0.594273	0.210689	0.135556	0.0480476	0.0114345	GCST90199626	SCN1A
metabolin	0.684116	0.161788	0.115038	0.0271939	0.0118632	GCST90199743	HTR1D
metabolin	0.653076	0.177281	0.124981	0.0339161	0.0107449	GCST90199743	HTR1B
metabolin	0.680893	0.155098	0.126303	0.0287611	0.00894527	GCST90199743	CALCRL
metabolin	0.0179581	0.00609832	0.720078	0.244518	0.0113477	GCST90199743	CACNA1A
metabolin	0.593318	0.168136	0.175597	0.049748	0.0132009	GCST90199743	ATP1A2
metabolin	0.612882	0.186134	0.141234	0.042876	0.0168743	GCST90199743	SCN1A
metabolin	0.678082	0.168913	0.114024	0.0283932	0.0105883	GCST90199756	HTR1D
metabolin	0.664444	0.166367	0.127157	0.0318279	0.0102055	GCST90199756	HTR1B
metabolin	0.674074	0.161812	0.125038	0.0300064	0.00906959	GCST90199756	CALCRL
metabolin	0.0181581	0.00595552	0.728098	0.238794	0.00899472	GCST90199756	CACNA1A
metabolin	0.597689	0.164232	0.176739	0.0485515	0.0127872	GCST90199756	ATP1A2
metabolin	0.590464	0.211961	0.135976	0.0487989	0.0128006	GCST90199756	SCN1A
metabolin	0.705689	0.141843	0.118666	0.0238418	0.00995978	GCST90199789	HTR1D
metabolin	0.652067	0.178661	0.124788	0.0341805	0.0103038	GCST90199789	HTR1B
metabolin	0.662759	0.172161	0.122939	0.0319251	0.0102155	GCST90199789	CALCRL
metabolin	0.0178399	0.00626307	0.715339	0.251125	0.00943234	GCST90199789	CACNA1A
metabolin	0.58768	0.171414	0.173954	0.0507227	0.0162282	GCST90199789	ATP1A2
metabolin	0.595423	0.207781	0.13721	0.0478696	0.011717	GCST90199789	SCN1A
metabolin	0.703473	0.144243	0.118293	0.0242456	0.00974573	GCST90199802	HTR1D
metabolin	0.642948	0.188666	0.123043	0.0360964	0.00924653	GCST90199802	HTR1B
metabolin	0.650487	0.184713	0.120663	0.0342536	0.00988459	GCST90199802	CALCRL
metabolin	0.0144632	0.00944571	0.579944	0.378734	0.017413	GCST90199802	CACNA1A
metabolin	0.239314	0.525517	0.0708537	0.155581	0.00873393	GCST90199802	ATP1A2
metabolin	0.593477	0.206101	0.136762	0.047478	0.0161821	GCST90199802	SCN1A
metabolin	0.643753	0.202924	0.108251	0.0341121	0.0109589	GCST90199832	HTR1D
metabolin	0.639554	0.192243	0.122394	0.0367812	0.00902748	GCST90199832	HTR1B
metabolin	0.63639	0.19853	0.118048	0.0368163	0.0102161	GCST90199832	CALCRL
metabolin	0.0178307	0.00597116	0.714972	0.239408	0.0218177	GCST90199832	CACNA1A
metabolin	0.590667	0.170002	0.174879	0.0503184	0.0141333	GCST90199832	ATP1A2
metabolin	0.627126	0.176231	0.144516	0.0405995	0.0115278	GCST90199832	SCN1A
metabolin	0.699441	0.146867	0.117615	0.0246853	0.0113909	GCST90199846	HTR1D
metabolin	0.672771	0.159098	0.12875	0.0304381	0.00894235	GCST90199846	HTR1B
metabolin	0.591182	0.242224	0.109662	0.0449195	0.0120133	GCST90199846	CALCRL
metabolin	0.0184525	0.00566416	0.739905	0.227111	0.00886656	GCST90199846	CACNA1A
metabolin	0.584227	0.178205	0.172967	0.0527477	0.0118527	GCST90199846	ATP1A2
metabolin	0.614861	0.188216	0.141689	0.0433609	0.0118729	GCST90199846	SCN1A
metabolin	0.658387	0.188803	0.110712	0.0317381	0.0103597	GCST90199869	HTR1D
metabolin	0.669763	0.162024	0.128175	0.030998	0.00904007	GCST90199869	HTR1B
metabolin	0.69185	0.144093	0.128335	0.0267197	0.00900132	GCST90199869	CALCRL
metabolin	0.0180679	0.00602707	0.724483	0.241662	0.00975912	GCST90199869	CACNA1A
metabolin	0.598536	0.161878	0.177208	0.0479126	0.014466	GCST90199869	ATP1A2
metabolin	0.442317	0.359338	0.101928	0.0827928	0.0136238	GCST90199869	SCN1A
metabolin	0.690188	0.157117	0.11606	0.02641	0.0102253	GCST90199897	HTR1D
metabolin	0.643591	0.187385	0.123185	0.035856	0.00998319	GCST90199897	HTR1B
metabolin	0.683118	0.152446	0.126716	0.0282687	0.00945129	GCST90199897	CALCRL
metabolin	0.0185202	0.00559415	0.742619	0.224304	0.0089632	GCST90199897	CACNA1A
metabolin	0.594483	0.16798	0.176009	0.0497221	0.0118054	GCST90199897	ATP1A2
metabolin	0.590366	0.211745	0.136045	0.0487818	0.0130622	GCST90199897	SCN1A
metabolin	0.695957	0.151103	0.11703	0.0253984	0.0105127	GCST90199919	HTR1D
metabolin	0.63177	0.199334	0.120927	0.0381447	0.00982426	GCST90199919	HTR1B
metabolin	0.629435	0.20442	0.116758	0.0379076	0.0114797	GCST90199919	CALCRL
metabolin	0.0177693	0.00624675	0.712507	0.250467	0.0130093	GCST90199919	CACNA1A
metabolin	0.598616	0.163628	0.177007	0.0483713	0.0123784	GCST90199919	ATP1A2
metabolin	0.579769	0.223376	0.133579	0.0514542	0.0118215	GCST90199919	SCN1A
metabolin	0.500112	0.340178	0.0840971	0.0571848	0.0184274	GCST90199923	HTR1D
metabolin	0.663329	0.167153	0.126943	0.0319781	0.0105958	GCST90199923	HTR1B
metabolin	0.656477	0.179158	0.121774	0.0332238	0.00936662	GCST90199923	CALCRL
metabolin	0.0177472	0.0063669	0.711623	0.255289	0.00897306	GCST90199923	CACNA1A
metabolin	0.601494	0.160456	0.178057	0.0474865	0.0125055	GCST90199923	ATP1A2
metabolin	0.633482	0.170297	0.14598	0.0392326	0.0110077	GCST90199923	SCN1A
metabolin	0.710228	0.137158	0.119236	0.0230163	0.0103619	GCST90199969	HTR1D
metabolin	0.56032	0.272014	0.107247	0.0520559	0.00836326	GCST90199969	HTR1B
metabolin	0.674139	0.162018	0.12505	0.0300449	0.008748	GCST90199969	CALCRL
metabolin	0.0179345	0.00616376	0.719133	0.247143	0.00962516	GCST90199969	CACNA1A
metabolin	0.580216	0.1815	0.171593	0.0536637	0.0130278	GCST90199969	ATP1A2
metabolin	0.590574	0.210985	0.135927	0.0485466	0.0139673	GCST90199969	SCN1A
metabolin	0.681246	0.16662	0.114121	0.0279018	0.0101111	GCST90199986	HTR1D
metabolin	0.667959	0.1635	0.127849	0.031285	0.00940594	GCST90199986	HTR1B
metabolin	0.677658	0.158317	0.125703	0.0293582	0.00896454	GCST90199986	CALCRL
metabolin	0.0185559	0.00554428	0.744051	0.222304	0.00954503	GCST90199986	CACNA1A
metabolin	0.603852	0.158169	0.178698	0.0467945	0.0124859	GCST90199986	ATP1A2
metabolin	0.610763	0.192173	0.140745	0.0442727	0.0120453	GCST90199986	SCN1A
metabolin	0.685396	0.160749	0.115254	0.0270193	0.0115824	GCST90200011	HTR1D
metabolin	0.674771	0.157078	0.129133	0.0300516	0.00896634	GCST90200011	HTR1B
metabolin	0.577698	0.249152	0.107161	0.0461968	0.0197925	GCST90200011	CALCRL
metabolin	0.016378	0.00722613	0.656722	0.289722	0.0299519	GCST90200011	CACNA1A
metabolin	0.608594	0.153826	0.180186	0.0455314	0.0118629	GCST90200011	ATP1A2
metabolin	0.619062	0.184448	0.142658	0.0424931	0.0113393	GCST90200011	SCN1A
metabolin	0.689377	0.158206	0.115932	0.0265955	0.0098894	GCST90200015	HTR1D
metabolin	0.6672	0.164061	0.127704	0.031392	0.00964273	GCST90200015	HTR1B
metabolin	0.661371	0.172172	0.122682	0.0319253	0.0118505	GCST90200015	CALCRL
metabolin	0.0178821	0.006086	0.717032	0.244021	0.0149795	GCST90200015	CACNA1A
metabolin	0.564683	0.194734	0.167025	0.0575834	0.0159748	GCST90200015	ATP1A2
metabolin	0.607867	0.196773	0.138463	0.0448098	0.0120875	GCST90200015	SCN1A
metabolin	0.686287	0.160676	0.115404	0.0270081	0.0106251	GCST90200070	HTR1D
metabolin	0.667557	0.163756	0.127752	0.0313289	0.00960624	GCST90200070	HTR1B
metabolin	0.637354	0.198627	0.118227	0.0368356	0.00895666	GCST90200070	CALCRL
metabolin	0.0179413	0.00615614	0.719406	0.246838	0.00965875	GCST90200070	CACNA1A
metabolin	0.590845	0.16994	0.174891	0.0502886	0.0140352	GCST90200070	ATP1A2
metabolin	0.612858	0.189734	0.141228	0.0437102	0.0124692	GCST90200070	SCN1A
metabolin	0.703825	0.1437	0.118353	0.0241541	0.00996832	GCST90200136	HTR1D
metabolin	0.32233	0.510414	0.0616853	0.0976716	0.00789898	GCST90200136	HTR1B
metabolin	0.688258	0.148028	0.127669	0.02745	0.00859467	GCST90200136	CALCRL
metabolin	0.00709429	0.0171353	0.284465	0.687084	0.00422114	GCST90200136	CACNA1A
metabolin	0.59721	0.164981	0.176775	0.0488224	0.0122112	GCST90200136	ATP1A2
metabolin	0.61342	0.189327	0.141357	0.0436164	0.0122798	GCST90200136	SCN1A
metabolin	0.69974	0.148193	0.117666	0.0249101	0.00949068	GCST90200149	HTR1D
metabolin	0.614995	0.217233	0.117694	0.0415641	0.00851402	GCST90200149	HTR1B
metabolin	0.676037	0.159526	0.125402	0.0295819	0.00945282	GCST90200149	CALCRL
metabolin	0.00712138	0.0171045	0.285551	0.685846	0.0043762	GCST90200149	CACNA1A
metabolin	0.576343	0.186057	0.170638	0.0550741	0.0118874	GCST90200149	ATP1A2
metabolin	0.61206	0.190433	0.141044	0.0438711	0.0125919	GCST90200149	SCN1A
metabolin	0.67882	0.168631	0.114041	0.0283197	0.0101876	GCST90200212	HTR1D
metabolin	0.293901	0.530857	0.0562535	0.10159	0.0173985	GCST90200212	HTR1B
metabolin	0.68259	0.15347	0.126618	0.0284593	0.00886262	GCST90200212	CALCRL
metabolin	0.0178973	0.00620088	0.717647	0.248633	0.0096221	GCST90200212	CACNA1A
metabolin	0.531007	0.230753	0.157097	0.0682547	0.0128887	GCST90200212	ATP1A2
metabolin	0.622301	0.181232	0.143326	0.0417291	0.0114125	GCST90200212	SCN1A
metabolin	0.68846	0.159239	0.115098	0.0266114	0.0105907	GCST90200217	HTR1D
metabolin	0.65155	0.179837	0.124692	0.0344072	0.00951337	GCST90200217	HTR1B
metabolin	0.59842	0.235571	0.110956	0.0436669	0.0113866	GCST90200217	CALCRL
metabolin	0.0176676	0.00640946	0.708425	0.256993	0.0105049	GCST90200217	CACNA1A
metabolin	0.55784	0.204441	0.164811	0.0603887	0.0125188	GCST90200217	ATP1A2
metabolin	0.568518	0.234652	0.130778	0.0539658	0.0120851	GCST90200217	SCN1A
metabolin	0.643389	0.203276	0.10819	0.0341711	0.0109746	GCST90200236	HTR1D
metabolin	0.658191	0.17222	0.12596	0.0329476	0.0106812	GCST90200236	HTR1B
metabolin	0.679498	0.156027	0.126044	0.0289329	0.00949859	GCST90200236	CALCRL
metabolin	0.0175147	0.00658577	0.702302	0.264065	0.00953204	GCST90200236	CACNA1A
metabolin	0.609517	0.152423	0.180459	0.0451155	0.0124848	GCST90200236	ATP1A2
metabolin	0.626102	0.177536	0.14428	0.0409005	0.0111813	GCST90200236	SCN1A
metabolin	0.714265	0.133615	0.120108	0.0224586	0.00955389	GCST90200237	HTR1D
metabolin	0.662018	0.169334	0.126692	0.0323965	0.00955868	GCST90200237	HTR1B
metabolin	0.649512	0.185692	0.120482	0.0344352	0.00987878	GCST90200237	CALCRL
metabolin	0.0139359	0.0102174	0.558797	0.409689	0.00736064	GCST90200237	CACNA1A
metabolin	0.58117	0.181164	0.172018	0.05361	0.0120382	GCST90200237	ATP1A2
metabolin	0.591145	0.211191	0.136224	0.0486544	0.0127853	GCST90200237	SCN1A
metabolin	0.696339	0.149799	0.117094	0.0251781	0.0115897	GCST90200271	HTR1D
metabolin	0.652026	0.179112	0.1248	0.0342728	0.00978979	GCST90200271	HTR1B
metabolin	0.559629	0.272144	0.103809	0.0504676	0.013951	GCST90200271	CALCRL
metabolin	0.0179032	0.00616687	0.717879	0.247267	0.0107838	GCST90200271	CACNA1A
metabolin	0.587561	0.169758	0.173959	0.0502418	0.0184801	GCST90200271	ATP1A2
metabolin	0.588172	0.215791	0.135515	0.0497077	0.010814	GCST90200271	SCN1A
metabolin	0.69482	0.153062	0.116838	0.0257288	0.00955106	GCST90200305	HTR1D
metabolin	0.675155	0.156009	0.129207	0.0298462	0.00978306	GCST90200305	HTR1B
metabolin	0.597754	0.236467	0.110881	0.0438527	0.0110451	GCST90200305	CALCRL
metabolin	0.0175641	0.00653798	0.70428	0.262149	0.00946898	GCST90200305	CACNA1A
metabolin	0.610214	0.15095	0.180625	0.0446679	0.0135436	GCST90200305	ATP1A2
metabolin	0.593945	0.20807	0.13687	0.0479348	0.0131805	GCST90200305	SCN1A
metabolin	0.665315	0.181562	0.111877	0.03052	0.0107263	GCST90200310	HTR1D
metabolin	0.65805	0.173721	0.125933	0.0332366	0.00905889	GCST90200310	HTR1B
metabolin	0.647842	0.185593	0.120172	0.0344149	0.0119779	GCST90200310	CALCRL
metabolin	0.0153123	0.00834037	0.613989	0.334402	0.0279564	GCST90200310	CACNA1A
metabolin	0.586834	0.171471	0.173744	0.0507502	0.0172017	GCST90200310	ATP1A2
metabolin	0.62516	0.178848	0.144063	0.0412033	0.0107262	GCST90200310	SCN1A
metabolin	0.709342	0.138461	0.11928	0.0232735	0.00964357	GCST90200341	HTR1D
metabolin	0.618421	0.212653	0.118349	0.0406863	0.00989018	GCST90200341	HTR1B
metabolin	0.664879	0.170713	0.123332	0.0316571	0.00941886	GCST90200341	CALCRL
metabolin	0.0180576	0.00572735	0.724068	0.229631	0.0225154	GCST90200341	CACNA1A
metabolin	0.433539	0.329706	0.128358	0.0976052	0.0107923	GCST90200341	ATP1A2
metabolin	0.563513	0.238215	0.129857	0.054881	0.0135349	GCST90200341	SCN1A
metabolin	0.673013	0.173505	0.113171	0.0291649	0.0111453	GCST90200351	HTR1D
metabolin	0.642089	0.189577	0.122879	0.0362708	0.00918433	GCST90200351	HTR1B
metabolin	0.662117	0.173543	0.12282	0.0321823	0.00933711	GCST90200351	CALCRL
metabolin	0.0183562	0.00576214	0.736042	0.23104	0.00879972	GCST90200351	CACNA1A
metabolin	0.462911	0.300548	0.137022	0.0889522	0.0105666	GCST90200351	ATP1A2
metabolin	0.6095	0.193043	0.140454	0.0444727	0.0125299	GCST90200351	SCN1A
metabolin	0.703465	0.143714	0.118292	0.024156	0.0103731	GCST90200402	HTR1D
metabolin	0.598748	0.233354	0.114584	0.0446491	0.00866435	GCST90200402	HTR1B
metabolin	0.681126	0.153567	0.126346	0.0284756	0.0104848	GCST90200402	CALCRL
metabolin	0.0183522	0.0057499	0.735882	0.230549	0.00946765	GCST90200402	CACNA1A
metabolin	0.603988	0.158294	0.178768	0.0468394	0.0121112	GCST90200402	ATP1A2
metabolin	0.563404	0.236885	0.129832	0.0545728	0.0153072	GCST90200402	SCN1A
metabolin	0.667819	0.179829	0.112085	0.0301718	0.0100961	GCST90200469	HTR1D
metabolin	0.636125	0.193554	0.121737	0.0370294	0.0115545	GCST90200469	HTR1B
metabolin	0.672287	0.162795	0.124707	0.0301877	0.0100237	GCST90200469	CALCRL
metabolin	0.01543	0.00868433	0.618708	0.348213	0.0089645	GCST90200469	CACNA1A
metabolin	0.610969	0.150027	0.180889	0.0444049	0.0137097	GCST90200469	ATP1A2
metabolin	0.627484	0.175901	0.144598	0.0405234	0.0114928	GCST90200469	SCN1A
metabolin	0.70047	0.147086	0.117684	0.0247014	0.0100592	GCST90200506	HTR1D
metabolin	0.67375	0.157956	0.128893	0.0302088	0.00919248	GCST90200506	HTR1B
metabolin	0.623081	0.212741	0.115579	0.0394534	0.00914545	GCST90200506	CALCRL
metabolin	0.0164742	0.00740698	0.660578	0.296984	0.0185567	GCST90200506	CACNA1A
metabolin	0.59282	0.169326	0.175269	0.0500491	0.0125361	GCST90200506	ATP1A2
metabolin	0.550329	0.259105	0.121212	0.0570563	0.0122983	GCST90200506	SCN1A
metabolin	0.702084	0.145284	0.11806	0.0244202	0.0101525	GCST90200562	HTR1D
metabolin	0.616522	0.213492	0.117986	0.0408454	0.0111554	GCST90200562	HTR1B
metabolin	0.662349	0.173481	0.122863	0.0321709	0.00913598	GCST90200562	CALCRL
metabolin	0.0177663	0.00635827	0.712387	0.254944	0.00854408	GCST90200562	CACNA1A
metabolin	0.61165	0.150689	0.181091	0.0446026	0.0119667	GCST90200562	ATP1A2
metabolin	0.550826	0.252606	0.126933	0.0581996	0.011435	GCST90200562	SCN1A
metabolin	0.708096	0.139229	0.119071	0.0234021	0.0102015	GCST90200578	HTR1D
metabolin	0.648355	0.182873	0.124078	0.0349872	0.00970677	GCST90200578	HTR1B
metabolin	0.678707	0.157241	0.125897	0.0291585	0.00899672	GCST90200578	CALCRL
metabolin	0.0170294	0.00710404	0.68284	0.284848	0.00817828	GCST90200578	CACNA1A
metabolin	0.576918	0.183942	0.170769	0.0544332	0.0139386	GCST90200578	ATP1A2
metabolin	0.627109	0.176569	0.144512	0.0406778	0.0111324	GCST90200578	SCN1A
metabolin	0.667836	0.179072	0.112301	0.0301014	0.0106893	GCST90200595	HTR1D
metabolin	0.660823	0.170839	0.126483	0.03269	0.00916466	GCST90200595	HTR1B
metabolin	0.660961	0.173607	0.122606	0.0321928	0.0106338	GCST90200595	CALCRL
metabolin	0.0180837	0.00602003	0.725117	0.24138	0.00939878	GCST90200595	CACNA1A
metabolin	0.597039	0.164072	0.176688	0.048542	0.0136589	GCST90200595	ATP1A2
metabolin	0.589756	0.212785	0.135753	0.0489671	0.0127384	GCST90200595	SCN1A
metabolin	0.70495	0.142646	0.118522	0.0239729	0.00990947	GCST90200609	HTR1D
metabolin	0.669879	0.161614	0.128197	0.0309191	0.0093908	GCST90200609	HTR1B
metabolin	0.620342	0.214674	0.115071	0.039811	0.010102	GCST90200609	CALCRL
metabolin	0.0180447	0.00603963	0.723552	0.242165	0.0101982	GCST90200609	CACNA1A
metabolin	0.597365	0.164851	0.176829	0.0487862	0.0121682	GCST90200609	ATP1A2
metabolin	0.62785	0.176091	0.144578	0.0405384	0.0109421	GCST90200609	SCN1A
metabolin	0.701752	0.145438	0.118004	0.024446	0.0103601	GCST90200614	HTR1D
metabolin	0.616076	0.215272	0.1179	0.0411876	0.00956458	GCST90200614	HTR1B
metabolin	0.608366	0.225917	0.112849	0.0418957	0.0109728	GCST90200614	CALCRL
metabolin	0.017807	0.00557968	0.714024	0.223694	0.0388944	GCST90200614	CACNA1A
metabolin	0.602385	0.159942	0.178298	0.0473286	0.0120471	GCST90200614	ATP1A2
metabolin	0.624268	0.178945	0.143761	0.0411969	0.0118293	GCST90200614	SCN1A
metabolin	0.693707	0.153606	0.116599	0.0258081	0.0102791	GCST90200635	HTR1D
metabolin	0.672956	0.158715	0.128806	0.0303693	0.00915374	GCST90200635	HTR1B
metabolin	0.679009	0.156809	0.125953	0.0290782	0.00915091	GCST90200635	CALCRL
metabolin	0.0179879	0.00605338	0.721271	0.242714	0.0119739	GCST90200635	CACNA1A
metabolin	0.597022	0.164782	0.176679	0.0487518	0.0127656	GCST90200635	ATP1A2
metabolin	0.610813	0.193288	0.140647	0.0444961	0.0107559	GCST90200635	SCN1A
metabolin	0.698655	0.148813	0.117442	0.025005	0.0100852	GCST90200654	HTR1D
metabolin	0.608817	0.222397	0.116511	0.042551	0.0097239	GCST90200654	HTR1B
metabolin	0.656347	0.179222	0.12175	0.0332355	0.00944569	GCST90200654	CALCRL
metabolin	0.0178432	0.00612186	0.715476	0.245458	0.0151006	GCST90200654	CACNA1A
metabolin	0.585591	0.175823	0.173582	0.0521048	0.0128994	GCST90200654	ATP1A2
metabolin	0.592181	0.211405	0.136369	0.0486715	0.0113738	GCST90200654	SCN1A
metabolin	0.708918	0.138941	0.119209	0.0233542	0.00957742	GCST90200709	HTR1D
metabolin	0.623574	0.208038	0.119335	0.0398036	0.00924926	GCST90200709	HTR1B
metabolin	0.686061	0.150278	0.127262	0.0278675	0.00853121	GCST90200709	CALCRL
metabolin	0.0179196	0.00589337	0.718537	0.23629	0.0213605	GCST90200709	CACNA1A
metabolin	0.569876	0.190266	0.168723	0.0563172	0.0148179	GCST90200709	ATP1A2
metabolin	0.602087	0.200626	0.138746	0.0462203	0.0123201	GCST90200709	SCN1A
metabolin	0.697356	0.150426	0.116682	0.0251589	0.0103774	GCST90200732	HTR1D
metabolin	0.669737	0.1616	0.12817	0.0309164	0.00957676	GCST90200732	HTR1B
metabolin	0.600122	0.234064	0.11132	0.0434069	0.0110871	GCST90200732	CALCRL
metabolin	0.01777	0.00626335	0.712536	0.251133	0.0122974	GCST90200732	CACNA1A
metabolin	0.566345	0.195474	0.167132	0.0576723	0.0133761	GCST90200732	ATP1A2
metabolin	0.607607	0.195573	0.139968	0.0450402	0.0118123	GCST90200732	SCN1A
metabolin	0.702633	0.145701	0.117741	0.0244056	0.00952075	GCST90200808	HTR1D
metabolin	0.604641	0.226494	0.115712	0.0433351	0.00981777	GCST90200808	HTR1B
metabolin	0.676372	0.159577	0.125464	0.0295919	0.00899486	GCST90200808	CALCRL
metabolin	0.0182559	0.0057528	0.732019	0.230661	0.0133113	GCST90200808	CACNA1A
metabolin	0.607075	0.15606	0.179044	0.0460149	0.0118062	GCST90200808	ATP1A2
metabolin	0.621239	0.182082	0.143019	0.0419066	0.0117531	GCST90200808	SCN1A
metabolin	0.712271	0.13527	0.119773	0.0227366	0.00994892	GCST90200812	HTR1D
metabolin	0.614997	0.216102	0.117694	0.0413462	0.00986109	GCST90200812	HTR1B
metabolin	0.620371	0.214799	0.115076	0.0398344	0.00991954	GCST90200812	CALCRL
metabolin	0.0184015	0.00571692	0.73786	0.229227	0.00879502	GCST90200812	CACNA1A
metabolin	0.603884	0.156796	0.178661	0.0463742	0.0142851	GCST90200812	ATP1A2
metabolin	0.612336	0.191199	0.141108	0.0440488	0.0113092	GCST90200812	SCN1A
metabolin	0.701293	0.14525	0.117927	0.0244135	0.0111174	GCST90200814	HTR1D
metabolin	0.63753	0.192901	0.122006	0.0369055	0.0106571	GCST90200814	HTR1B
metabolin	0.677615	0.157379	0.125695	0.0291831	0.0101276	GCST90200814	CALCRL
metabolin	0.0158987	0.00823849	0.637502	0.330337	0.00802371	GCST90200814	CACNA1A
metabolin	0.579263	0.182865	0.171502	0.0541286	0.0122414	GCST90200814	ATP1A2
metabolin	0.581987	0.220462	0.134114	0.0507909	0.0126466	GCST90200814	SCN1A
metabolin	0.673413	0.172962	0.113239	0.0290734	0.0113129	GCST90200827	HTR1D
metabolin	0.646997	0.184029	0.123818	0.0352083	0.00994806	GCST90200827	HTR1B
metabolin	0.64137	0.193	0.118972	0.0357898	0.0108682	GCST90200827	CALCRL
metabolin	0.0161624	0.00706659	0.648077	0.283309	0.0453848	GCST90200827	CACNA1A
metabolin	0.524095	0.238891	0.155169	0.0707173	0.0111279	GCST90200827	ATP1A2
metabolin	0.610278	0.192563	0.140633	0.0443624	0.0121625	GCST90200827	SCN1A
metabolin	0.327678	0.520599	0.0551012	0.087533	0.00908829	GCST90200929	HTR1D
metabolin	0.664333	0.167067	0.127135	0.0319625	0.00950304	GCST90200929	HTR1B
metabolin	0.685454	0.150624	0.127149	0.0279314	0.00884122	GCST90200929	CALCRL
metabolin	0.0187055	0.00540717	0.750049	0.216807	0.00903193	GCST90200929	CACNA1A
metabolin	0.574481	0.172805	0.170048	0.0511191	0.031547	GCST90200929	ATP1A2
metabolin	0.63748	0.16654	0.146902	0.038367	0.0107114	GCST90200929	SCN1A
metabolin	0.696832	0.15054	0.117058	0.0252784	0.0102911	GCST90200953	HTR1D
metabolin	0.658743	0.170674	0.126066	0.0326505	0.0118675	GCST90200953	HTR1B
metabolin	0.577357	0.255979	0.107097	0.0474709	0.0120965	GCST90200953	CALCRL
metabolin	0.0184536	0.00565993	0.739949	0.226941	0.00899577	GCST90200953	CACNA1A
metabolin	0.603942	0.158279	0.178809	0.0468495	0.0121205	GCST90200953	ATP1A2
metabolin	0.462466	0.340682	0.106571	0.0784955	0.0117853	GCST90200953	SCN1A
metabolin	0.577252	0.269419	0.0969706	0.0452476	0.0111112	GCST90201015	HTR1D
metabolin	0.636394	0.194327	0.121789	0.0371787	0.0103116	GCST90201015	HTR1B
metabolin	0.642988	0.192492	0.119272	0.0356969	0.00955165	GCST90201015	CALCRL
metabolin	0.018183	0.00591788	0.729096	0.237284	0.00951918	GCST90201015	CACNA1A
metabolin	0.552526	0.210386	0.163533	0.0622575	0.0112965	GCST90201015	ATP1A2
metabolin	0.616745	0.186084	0.142124	0.0428693	0.0121782	GCST90201015	SCN1A
immunocyte	0.601877	0.26011	0.0891834	0.0385315	0.0102984	ebi-a-GCST90001502.txt.gz	CALCA
immunocyte	0.595793	0.259675	0.0928161	0.0404425	0.0112737	ebi-a-GCST90001502.txt.gz	CALCB
immunocyte	0.59438	0.196307	0.148461	0.0490207	0.0118318	ebi-a-GCST90001502.txt.gz	HTR1F
immunocyte	0.706913	0.159231	0.100806	0.0226962	0.0103535	ebi-a-GCST90001520.txt.gz	CALCA
immunocyte	0.699107	0.161088	0.104948	0.0241715	0.0106859	ebi-a-GCST90001520.txt.gz	CALCB
immunocyte	0.617432	0.197001	0.133081	0.0424514	0.0100353	ebi-a-GCST90001520.txt.gz	HTR1F
immunocyte	0.748191	0.118967	0.106693	0.0169556	0.00919289	ebi-a-GCST90001524.txt.gz	CALCA
immunocyte	0.741513	0.119589	0.111314	0.0179428	0.00964111	ebi-a-GCST90001524.txt.gz	CALCB
immunocyte	0.627334	0.186952	0.135215	0.0402853	0.0102137	ebi-a-GCST90001524.txt.gz	HTR1F
immunocyte	0.688041	0.176635	0.0981152	0.0251763	0.0120329	ebi-a-GCST90001525.txt.gz	CALCA
immunocyte	0.680883	0.177738	0.102213	0.0266691	0.0124978	ebi-a-GCST90001525.txt.gz	CALCB
immunocyte	0.636915	0.177032	0.13728	0.0381466	0.0106269	ebi-a-GCST90001525.txt.gz	HTR1F
immunocyte	0.751133	0.141164	0.0847873	0.0159274	0.00698895	ebi-a-GCST90001610.txt.gz	CALCA
immunocyte	0.744197	0.141447	0.0898018	0.0170609	0.00749346	ebi-a-GCST90001610.txt.gz	CALCB
immunocyte	0.616201	0.174912	0.154101	0.0437314	0.0110542	ebi-a-GCST90001610.txt.gz	HTR1F
immunocyte	0.711197	0.18036	0.0802793	0.0203511	0.00781216	ebi-a-GCST90001614.txt.gz	CALCA
immunocyte	0.662321	0.222846	0.0799219	0.0268827	0.00802881	ebi-a-GCST90001614.txt.gz	CALCB
immunocyte	0.584776	0.203864	0.146242	0.0509687	0.0141485	ebi-a-GCST90001614.txt.gz	HTR1F
immunocyte	0.731003	0.161061	0.0824548	0.0181598	0.0073209	ebi-a-GCST90001627.txt.gz	CALCA
immunocyte	0.724499	0.160697	0.0873652	0.0193699	0.00806839	ebi-a-GCST90001627.txt.gz	CALCB
immunocyte	0.485015	0.298357	0.12114	0.074498	0.0209907	ebi-a-GCST90001627.txt.gz	HTR1F
immunocyte	0.707851	0.152055	0.104886	0.0225182	0.0126894	ebi-a-GCST90001667.txt.gz	CALCA
immunocyte	0.692647	0.160933	0.107905	0.0250577	0.0134572	ebi-a-GCST90001667.txt.gz	CALCB
immunocyte	0.612586	0.17856	0.153008	0.0445884	0.011257	ebi-a-GCST90001667.txt.gz	HTR1F
immunocyte	0.734719	0.128337	0.108409	0.0189267	0.00960844	ebi-a-GCST90001674.txt.gz	CALCA
immunocyte	0.722589	0.134435	0.112209	0.0208662	0.00989994	ebi-a-GCST90001674.txt.gz	CALCB
immunocyte	0.635757	0.173401	0.141232	0.0385097	0.0110995	ebi-a-GCST90001674.txt.gz	HTR1F
immunocyte	0.709589	0.128195	0.127463	0.0230159	0.0117364	ebi-a-GCST90001746.txt.gz	CALCA
immunocyte	0.706298	0.125965	0.132167	0.0235594	0.0120098	ebi-a-GCST90001746.txt.gz	CALCB
immunocyte	0.623378	0.167679	0.155436	0.0417982	0.0117089	ebi-a-GCST90001746.txt.gz	HTR1F
immunocyte	0.688816	0.149135	0.123732	0.0267775	0.01154	ebi-a-GCST90001758.txt.gz	CALCA
immunocyte	0.709181	0.123016	0.132707	0.0230074	0.0120896	ebi-a-GCST90001758.txt.gz	CALCB
immunocyte	0.63077	0.160546	0.157279	0.04002	0.0113847	ebi-a-GCST90001758.txt.gz	HTR1F
immunocyte	0.70272	0.140335	0.121273	0.0242071	0.0114649	ebi-a-GCST90001767.txt.gz	CALCA
immunocyte	0.694022	0.142997	0.125071	0.0257575	0.0121529	ebi-a-GCST90001767.txt.gz	CALCB
immunocyte	0.612384	0.182604	0.148636	0.0443088	0.0120684	ebi-a-GCST90001767.txt.gz	HTR1F
immunocyte	0.756233	0.136853	0.0837545	0.0151488	0.00801041	ebi-a-GCST90001863.txt.gz	CALCA
immunocyte	0.744966	0.141929	0.088006	0.0167583	0.00834091	ebi-a-GCST90001863.txt.gz	CALCB
immunocyte	0.619151	0.172414	0.154043	0.0428847	0.0115066	ebi-a-GCST90001863.txt.gz	HTR1F
immunocyte	0.731796	0.139927	0.100133	0.0191375	0.00900687	ebi-a-GCST90001873.txt.gz	CALCA
immunocyte	0.716816	0.149287	0.103107	0.0214642	0.00932566	ebi-a-GCST90001873.txt.gz	CALCB
immunocyte	0.464423	0.345738	0.0981682	0.0730624	0.018608	ebi-a-GCST90001873.txt.gz	HTR1F
immunocyte	0.733723	0.137718	0.100397	0.0188349	0.00932748	ebi-a-GCST90001876.txt.gz	CALCA
immunocyte	0.72589	0.13969	0.104412	0.0200832	0.00992447	ebi-a-GCST90001876.txt.gz	CALCB
immunocyte	0.629739	0.187232	0.133112	0.039566	0.0103514	ebi-a-GCST90001876.txt.gz	HTR1F
immunocyte	0.736445	0.135196	0.100769	0.01849	0.00910063	ebi-a-GCST90001880.txt.gz	CALCA
immunocyte	0.727844	0.137869	0.104693	0.0198213	0.00977264	ebi-a-GCST90001880.txt.gz	CALCB
immunocyte	0.630713	0.186461	0.133318	0.0394035	0.0101043	ebi-a-GCST90001880.txt.gz	HTR1F
immunocyte	0.722225	0.149455	0.0988234	0.0204412	0.00905498	ebi-a-GCST90001881.txt.gz	CALCA
immunocyte	0.704183	0.161845	0.10129	0.0232704	0.0094122	ebi-a-GCST90001881.txt.gz	CALCB
immunocyte	0.573785	0.240881	0.121285	0.0509035	0.0131459	ebi-a-GCST90001881.txt.gz	HTR1F
immunocyte	0.772434	0.121631	0.0855488	0.013464	0.00692276	ebi-a-GCST90001927.txt.gz	CALCA
immunocyte	0.761473	0.126427	0.089956	0.0149282	0.00721547	ebi-a-GCST90001927.txt.gz	CALCB
immunocyte	0.610439	0.180644	0.151876	0.0449315	0.0121101	ebi-a-GCST90001927.txt.gz	HTR1F
immunocyte	0.737484	0.125257	0.109277	0.0185505	0.00943206	ebi-a-GCST90001933.txt.gz	CALCA
immunocyte	0.732944	0.123863	0.114182	0.0192864	0.00972359	ebi-a-GCST90001933.txt.gz	CALCB
immunocyte	0.603988	0.187285	0.150861	0.0467678	0.011099	ebi-a-GCST90001933.txt.gz	HTR1F
immunocyte	0.704994	0.185894	0.0783601	0.0206521	0.0101001	ebi-a-GCST90001978.txt.gz	CALCA
immunocyte	0.703873	0.180765	0.0835088	0.0214359	0.0104166	ebi-a-GCST90001978.txt.gz	CALCB
immunocyte	0.622881	0.168882	0.154958	0.0420026	0.0112766	ebi-a-GCST90001978.txt.gz	HTR1F
immunocyte	0.715597	0.122478	0.128543	0.0219893	0.0113927	ebi-a-GCST90001999.txt.gz	CALCA
immunocyte	0.683496	0.148994	0.1279	0.0278691	0.01174	ebi-a-GCST90001999.txt.gz	CALCB
immunocyte	0.615175	0.176198	0.153391	0.0439228	0.0113135	ebi-a-GCST90001999.txt.gz	HTR1F
immunocyte	0.746954	0.150949	0.0791786	0.015994	0.00692468	ebi-a-GCST90002043.txt.gz	CALCA
immunocyte	0.750824	0.140594	0.0853215	0.0159694	0.0072916	ebi-a-GCST90002043.txt.gz	CALCB
immunocyte	0.623447	0.191186	0.133991	0.0410793	0.010296	ebi-a-GCST90002043.txt.gz	HTR1F
immunocyte	0.766461	0.127448	0.0848145	0.0140958	0.00718099	ebi-a-GCST90002055.txt.gz	CALCA
immunocyte	0.760305	0.127419	0.0897459	0.0150329	0.0074977	ebi-a-GCST90002055.txt.gz	CALCB
immunocyte	0.594634	0.196099	0.147943	0.0487764	0.0125465	ebi-a-GCST90002055.txt.gz	HTR1F
immunocyte	0.832706	0.0920566	0.0630949	0.00697004	0.00517278	ebi-a-GCST90001502.txt.gz	HTR1D
immunocyte	0.915428	0.0532679	0.0276063	0.00160429	0.00209309	ebi-a-GCST90001502.txt.gz	HTR1B
immunocyte	0.93269	0.0407893	0.023751	0.00103697	0.0017324	ebi-a-GCST90001502.txt.gz	CALCRL
immunocyte	0.0754502	0.0259936	0.647885	0.223177	0.0274935	ebi-a-GCST90001502.txt.gz	CACNA1A
immunocyte	0.66976	0.147653	0.14233	0.0313688	0.00888755	ebi-a-GCST90001502.txt.gz	ATP1A2
immunocyte	0.898891	0.0614683	0.0341573	0.00233261	0.00315123	ebi-a-GCST90001502.txt.gz	SCN1A
immunocyte	0.736792	0.188804	0.0544345	0.0139429	0.0060261	ebi-a-GCST90001520.txt.gz	HTR1D
immunocyte	0.864858	0.103807	0.0253837	0.00304385	0.00290708	ebi-a-GCST90001520.txt.gz	HTR1B
immunocyte	0.906681	0.0669281	0.0225097	0.00165936	0.00222174	ebi-a-GCST90001520.txt.gz	CALCRL
immunocyte	0.0770467	0.0226169	0.658898	0.19337	0.0480682	ebi-a-GCST90001520.txt.gz	CACNA1A
immunocyte	0.654622	0.165617	0.135568	0.0342882	0.0099053	ebi-a-GCST90001520.txt.gz	ATP1A2
immunocyte	0.91953	0.0446963	0.0315493	0.00153085	0.00269369	ebi-a-GCST90001520.txt.gz	SCN1A
immunocyte	0.831568	0.0946906	0.0614366	0.00699046	0.0053142	ebi-a-GCST90001524.txt.gz	HTR1D
immunocyte	0.911089	0.0583941	0.0267406	0.00171181	0.00206472	ebi-a-GCST90001524.txt.gz	HTR1B
immunocyte	0.928618	0.0454231	0.0230543	0.00112592	0.00177858	ebi-a-GCST90001524.txt.gz	CALCRL
immunocyte	0.079692	0.0202127	0.68152	0.172812	0.0457633	ebi-a-GCST90001524.txt.gz	CACNA1A
immunocyte	0.637598	0.182414	0.132042	0.0377666	0.0101785	ebi-a-GCST90001524.txt.gz	ATP1A2
immunocyte	0.924226	0.040172	0.0317104	0.0013758	0.00251576	ebi-a-GCST90001524.txt.gz	SCN1A
immunocyte	0.79837	0.126385	0.0589838	0.00933042	0.00693123	ebi-a-GCST90001525.txt.gz	HTR1D
immunocyte	0.91159	0.0578256	0.0267553	0.00169506	0.00213388	ebi-a-GCST90001525.txt.gz	HTR1B
immunocyte	0.929221	0.0448305	0.0230693	0.00111121	0.00176791	ebi-a-GCST90001525.txt.gz	CALCRL
immunocyte	0.0800511	0.02233	0.684591	0.190943	0.0220848	ebi-a-GCST90001525.txt.gz	CACNA1A
immunocyte	0.662853	0.157557	0.137272	0.0326193	0.00969812	ebi-a-GCST90001525.txt.gz	ATP1A2
immunocyte	0.922568	0.041782	0.0316535	0.00143098	0.00256596	ebi-a-GCST90001525.txt.gz	SCN1A
immunocyte	0.831885	0.0922803	0.0632572	0.0070115	0.00556551	ebi-a-GCST90001610.txt.gz	HTR1D
immunocyte	0.863342	0.103777	0.0260037	0.00312197	0.0037553	ebi-a-GCST90001610.txt.gz	HTR1B
immunocyte	0.923281	0.0499191	0.0235114	0.00126917	0.00201921	ebi-a-GCST90001610.txt.gz	CALCRL
immunocyte	0.0809767	0.0215161	0.695382	0.184751	0.0173747	ebi-a-GCST90001610.txt.gz	CACNA1A
immunocyte	0.223083	0.592009	0.047444	0.125894	0.0115702	ebi-a-GCST90001610.txt.gz	ATP1A2
immunocyte	0.912779	0.0477584	0.0347595	0.0018158	0.00288715	ebi-a-GCST90001610.txt.gz	SCN1A
immunocyte	0.809971	0.114106	0.0615908	0.00867108	0.00566114	ebi-a-GCST90001614.txt.gz	HTR1D
immunocyte	0.92617	0.0427173	0.027896	0.0012847	0.00193179	ebi-a-GCST90001614.txt.gz	HTR1B
immunocyte	0.929748	0.0437276	0.023676	0.00111179	0.00173631	ebi-a-GCST90001614.txt.gz	CALCRL
immunocyte	0.0791257	0.0232248	0.679486	0.199423	0.0187407	ebi-a-GCST90001614.txt.gz	CACNA1A
immunocyte	0.585337	0.22628	0.124486	0.0481083	0.0157882	ebi-a-GCST90001614.txt.gz	ATP1A2
immunocyte	0.886598	0.0735175	0.0337626	0.0027963	0.00332537	ebi-a-GCST90001614.txt.gz	SCN1A
immunocyte	0.803489	0.121008	0.0610979	0.00919633	0.00520897	ebi-a-GCST90001627.txt.gz	HTR1D
immunocyte	0.927631	0.0413418	0.02794	0.00124336	0.00184386	ebi-a-GCST90001627.txt.gz	HTR1B
immunocyte	0.922509	0.0507172	0.0234917	0.00128952	0.00199237	ebi-a-GCST90001627.txt.gz	CALCRL
immunocyte	0.0697667	0.033002	0.599116	0.283387	0.014728	ebi-a-GCST90001627.txt.gz	CACNA1A
immunocyte	0.612941	0.201583	0.130038	0.0427541	0.0126843	ebi-a-GCST90001627.txt.gz	ATP1A2
immunocyte	0.92101	0.0397472	0.0349077	0.00150365	0.00283107	ebi-a-GCST90001627.txt.gz	SCN1A
immunocyte	0.824913	0.0986983	0.062727	0.00749893	0.00616319	ebi-a-GCST90001667.txt.gz	HTR1D
immunocyte	0.886186	0.0809322	0.0267244	0.00243692	0.00372039	ebi-a-GCST90001667.txt.gz	HTR1B
immunocyte	0.929155	0.0441292	0.0236609	0.00112182	0.00193352	ebi-a-GCST90001667.txt.gz	CALCRL
immunocyte	0.0821274	0.0203188	0.705222	0.174458	0.017874	ebi-a-GCST90001667.txt.gz	CACNA1A
immunocyte	0.674338	0.142605	0.143303	0.0302954	0.00945807	ebi-a-GCST90001667.txt.gz	ATP1A2
immunocyte	0.903548	0.0561647	0.0343343	0.0021304	0.00382275	ebi-a-GCST90001667.txt.gz	SCN1A
immunocyte	0.846959	0.0786239	0.063813	0.00591914	0.00468529	ebi-a-GCST90001674.txt.gz	HTR1D
immunocyte	0.920367	0.0485597	0.027667	0.00145779	0.00194852	ebi-a-GCST90001674.txt.gz	HTR1B
immunocyte	0.927075	0.0464435	0.0234219	0.00117147	0.0018883	ebi-a-GCST90001674.txt.gz	CALCRL
immunocyte	0.0682486	0.0284748	0.586005	0.244421	0.0728511	ebi-a-GCST90001674.txt.gz	CACNA1A
immunocyte	0.656663	0.159521	0.139326	0.0338354	0.0106543	ebi-a-GCST90001674.txt.gz	ATP1A2
immunocyte	0.922612	0.0373409	0.0359277	0.00145143	0.0026677	ebi-a-GCST90001674.txt.gz	SCN1A
immunocyte	0.836638	0.0885971	0.0632175	0.00668966	0.00485785	ebi-a-GCST90001746.txt.gz	HTR1D
immunocyte	0.906094	0.0623369	0.0271103	0.00186252	0.00259595	ebi-a-GCST90001746.txt.gz	HTR1B
immunocyte	0.929199	0.0441531	0.0237154	0.00112509	0.00180713	ebi-a-GCST90001746.txt.gz	CALCRL
immunocyte	0.0820045	0.0194673	0.704029	0.167104	0.027395	ebi-a-GCST90001746.txt.gz	CACNA1A
immunocyte	0.664477	0.152708	0.141368	0.0324797	0.00896706	ebi-a-GCST90001746.txt.gz	ATP1A2
immunocyte	0.922852	0.0373006	0.0357358	0.00144173	0.00267022	ebi-a-GCST90001746.txt.gz	SCN1A
immunocyte	0.81901	0.105858	0.0618855	0.00799355	0.00525228	ebi-a-GCST90001758.txt.gz	HTR1D
immunocyte	0.922363	0.046566	0.027597	0.00139117	0.00208251	ebi-a-GCST90001758.txt.gz	HTR1B
immunocyte	0.929289	0.0439792	0.0237177	0.00112056	0.00189316	ebi-a-GCST90001758.txt.gz	CALCRL
immunocyte	0.0815124	0.0205752	0.699805	0.176622	0.0214858	ebi-a-GCST90001758.txt.gz	CACNA1A
immunocyte	0.430688	0.386667	0.0916291	0.0822549	0.00876107	ebi-a-GCST90001758.txt.gz	ATP1A2
immunocyte	0.920486	0.0395318	0.0356442	0.00152799	0.00281032	ebi-a-GCST90001758.txt.gz	SCN1A
immunocyte	0.825567	0.101524	0.0602355	0.0074022	0.00527073	ebi-a-GCST90001767.txt.gz	HTR1D
immunocyte	0.900424	0.0701896	0.0251706	0.00195984	0.00225574	ebi-a-GCST90001767.txt.gz	HTR1B
immunocyte	0.926501	0.0476097	0.0227629	0.00116775	0.00195815	ebi-a-GCST90001767.txt.gz	CALCRL
immunocyte	0.0669905	0.0260259	0.57169	0.221989	0.113306	ebi-a-GCST90001767.txt.gz	CACNA1A
immunocyte	0.665845	0.158429	0.134187	0.0319183	0.00962069	ebi-a-GCST90001767.txt.gz	ATP1A2
immunocyte	0.878648	0.0817923	0.0331382	0.00308146	0.00334053	ebi-a-GCST90001767.txt.gz	SCN1A
immunocyte	0.750057	0.174294	0.0565025	0.0131237	0.00602243	ebi-a-GCST90001863.txt.gz	HTR1D
immunocyte	0.914016	0.0550228	0.0273678	0.00164556	0.00194794	ebi-a-GCST90001863.txt.gz	HTR1B
immunocyte	0.921332	0.0522175	0.0232768	0.00131738	0.00185598	ebi-a-GCST90001863.txt.gz	CALCRL
immunocyte	0.0790142	0.0234395	0.67836	0.201217	0.0179685	ebi-a-GCST90001863.txt.gz	CACNA1A
immunocyte	0.610742	0.204412	0.128687	0.0430577	0.0131019	ebi-a-GCST90001863.txt.gz	ATP1A2
immunocyte	0.921196	0.0396553	0.0345009	0.00148202	0.00316577	ebi-a-GCST90001863.txt.gz	SCN1A
immunocyte	0.828522	0.0998766	0.0592804	0.00714094	0.0051799	ebi-a-GCST90001873.txt.gz	HTR1D
immunocyte	0.911068	0.0607324	0.0244493	0.00162769	0.00212295	ebi-a-GCST90001873.txt.gz	HTR1B
immunocyte	0.921111	0.0535162	0.0221775	0.00128659	0.00190915	ebi-a-GCST90001873.txt.gz	CALCRL
immunocyte	0.0641812	0.0349004	0.550455	0.299275	0.0511891	ebi-a-GCST90001873.txt.gz	CACNA1A
immunocyte	0.658469	0.167439	0.13087	0.0332684	0.00995398	ebi-a-GCST90001873.txt.gz	ATP1A2
immunocyte	0.916294	0.0447614	0.0343235	0.00167377	0.00294769	ebi-a-GCST90001873.txt.gz	SCN1A
immunocyte	0.825435	0.102916	0.0590595	0.00735839	0.00523039	ebi-a-GCST90001876.txt.gz	HTR1D
immunocyte	0.91809	0.0539525	0.0246378	0.00144599	0.00187359	ebi-a-GCST90001876.txt.gz	HTR1B
immunocyte	0.927839	0.0468873	0.0223395	0.00112709	0.0018075	ebi-a-GCST90001876.txt.gz	CALCRL
immunocyte	0.0737251	0.0247742	0.632309	0.212421	0.0567708	ebi-a-GCST90001876.txt.gz	CACNA1A
immunocyte	0.653293	0.172471	0.129842	0.0342683	0.0101265	ebi-a-GCST90001876.txt.gz	ATP1A2
immunocyte	0.900327	0.0605558	0.0337254	0.00226523	0.00312635	ebi-a-GCST90001876.txt.gz	SCN1A
immunocyte	0.830186	0.0983922	0.0593994	0.00703493	0.00498762	ebi-a-GCST90001880.txt.gz	HTR1D
immunocyte	0.909072	0.0628256	0.0243957	0.00168396	0.00202309	ebi-a-GCST90001880.txt.gz	HTR1B
immunocyte	0.928103	0.0466284	0.0223458	0.00112086	0.00180159	ebi-a-GCST90001880.txt.gz	CALCRL
immunocyte	0.0720483	0.0238116	0.617928	0.20414	0.0820725	ebi-a-GCST90001880.txt.gz	CACNA1A
immunocyte	0.662721	0.163292	0.131715	0.0324443	0.00982724	ebi-a-GCST90001880.txt.gz	ATP1A2
immunocyte	0.895758	0.0650554	0.0335542	0.00243371	0.00319828	ebi-a-GCST90001880.txt.gz	SCN1A
immunocyte	0.825675	0.102858	0.0590766	0.0073544	0.00503624	ebi-a-GCST90001881.txt.gz	HTR1D
immunocyte	0.916312	0.0557499	0.02459	0.00149424	0.00185394	ebi-a-GCST90001881.txt.gz	HTR1B
immunocyte	0.921296	0.0532801	0.0221819	0.00128086	0.00196069	ebi-a-GCST90001881.txt.gz	CALCRL
immunocyte	0.068165	0.0317973	0.584622	0.272669	0.0427462	ebi-a-GCST90001881.txt.gz	CACNA1A
immunocyte	0.626845	0.198736	0.124585	0.0394883	0.010345	ebi-a-GCST90001881.txt.gz	ATP1A2
immunocyte	0.916056	0.0449275	0.0343146	0.00167992	0.00302178	ebi-a-GCST90001881.txt.gz	SCN1A
immunocyte	0.828899	0.0960943	0.0624417	0.00723354	0.00533167	ebi-a-GCST90001927.txt.gz	HTR1D
immunocyte	0.909173	0.0596394	0.0272227	0.00178356	0.00218173	ebi-a-GCST90001927.txt.gz	HTR1B
immunocyte	0.920124	0.0534409	0.0232463	0.00134831	0.00184093	ebi-a-GCST90001927.txt.gz	CALCRL
immunocyte	0.0793798	0.0221663	0.681499	0.190278	0.0266768	ebi-a-GCST90001927.txt.gz	CACNA1A
immunocyte	0.571626	0.244947	0.120445	0.0516005	0.0113817	ebi-a-GCST90001927.txt.gz	ATP1A2
immunocyte	0.92444	0.0370186	0.0346224	0.00138389	0.00253564	ebi-a-GCST90001927.txt.gz	SCN1A
immunocyte	0.828745	0.0951001	0.0630184	0.00722557	0.00591091	ebi-a-GCST90001933.txt.gz	HTR1D
immunocyte	0.923519	0.0453587	0.0278503	0.00136596	0.00190632	ebi-a-GCST90001933.txt.gz	HTR1B
immunocyte	0.78602	0.186334	0.020016	0.00474212	0.00288762	ebi-a-GCST90001933.txt.gz	CALCRL
immunocyte	0.0795087	0.0228559	0.682735	0.196243	0.0186567	ebi-a-GCST90001933.txt.gz	CACNA1A
immunocyte	0.666185	0.149392	0.141571	0.0317361	0.0111161	ebi-a-GCST90001933.txt.gz	ATP1A2
immunocyte	0.914418	0.0459796	0.0347474	0.00174409	0.00311046	ebi-a-GCST90001933.txt.gz	SCN1A
immunocyte	0.816436	0.108107	0.0615029	0.008138	0.00581622	ebi-a-GCST90001978.txt.gz	HTR1D
immunocyte	0.915313	0.0534924	0.0273728	0.00159749	0.00222414	ebi-a-GCST90001978.txt.gz	HTR1B
immunocyte	0.930775	0.0426639	0.0235154	0.0010759	0.00196974	ebi-a-GCST90001978.txt.gz	CALCRL
immunocyte	0.0824691	0.0197002	0.708097	0.169129	0.0206051	ebi-a-GCST90001978.txt.gz	CACNA1A
immunocyte	0.622694	0.194665	0.131361	0.0410555	0.0102237	ebi-a-GCST90001978.txt.gz	ATP1A2
immunocyte	0.923276	0.0365935	0.0358766	0.00141912	0.00283422	ebi-a-GCST90001978.txt.gz	SCN1A
immunocyte	0.838396	0.086617	0.0633503	0.0065398	0.0050967	ebi-a-GCST90001999.txt.gz	HTR1D
immunocyte	0.926979	0.0428251	0.0271474	0.00125237	0.00179613	ebi-a-GCST90001999.txt.gz	HTR1B
immunocyte	0.928019	0.0450932	0.0238082	0.00115494	0.00192502	ebi-a-GCST90001999.txt.gz	CALCRL
immunocyte	0.0825324	0.0198284	0.708555	0.170212	0.0188723	ebi-a-GCST90001999.txt.gz	CACNA1A
immunocyte	0.225573	0.587715	0.047957	0.124935	0.0138206	ebi-a-GCST90001999.txt.gz	ATP1A2
immunocyte	0.906677	0.0531443	0.0351095	0.00205491	0.00301419	ebi-a-GCST90001999.txt.gz	SCN1A
immunocyte	0.795343	0.130646	0.0584786	0.00959997	0.00593218	ebi-a-GCST90002043.txt.gz	HTR1D
immunocyte	0.906495	0.0628478	0.0264891	0.00183417	0.00233385	ebi-a-GCST90002043.txt.gz	HTR1B
immunocyte	0.915751	0.0581633	0.0226012	0.00143345	0.00205112	ebi-a-GCST90002043.txt.gz	CALCRL
immunocyte	0.0773214	0.0247432	0.661199	0.211561	0.0251747	ebi-a-GCST90002043.txt.gz	CACNA1A
immunocyte	0.653992	0.168259	0.133927	0.0344473	0.00937465	ebi-a-GCST90002043.txt.gz	ATP1A2
immunocyte	0.923715	0.040978	0.0313389	0.00138768	0.00258001	ebi-a-GCST90002043.txt.gz	SCN1A
immunocyte	0.829559	0.0954198	0.0624102	0.00717328	0.00543759	ebi-a-GCST90002055.txt.gz	HTR1D
immunocyte	0.924971	0.0442556	0.0275392	0.00131571	0.00191845	ebi-a-GCST90002055.txt.gz	HTR1B
immunocyte	0.924969	0.0484786	0.0233687	0.00122282	0.00196042	ebi-a-GCST90002055.txt.gz	CALCRL
immunocyte	0.0519089	0.0393468	0.445636	0.337665	0.125444	ebi-a-GCST90002055.txt.gz	CACNA1A
immunocyte	0.672593	0.144582	0.141734	0.0304566	0.0106355	ebi-a-GCST90002055.txt.gz	ATP1A2
immunocyte	0.916728	0.0445605	0.0343336	0.00166618	0.00271144	ebi-a-GCST90002055.txt.gz	SCN1A
inflammatory factors	0.652372	0.107769	0.197274	0.0325789	0.0100061	GCST90274768.tsv.gz	CALCA
inflammatory factors	0.66552	0.094668	0.201101	0.0285958	0.010115	GCST90274768.tsv.gz	CALCB
inflammatory factors	0.684951	0.137457	0.141081	0.0283043	0.00820592	GCST90274768.tsv.gz	HTR1F
inflammatory factors	0.636603	0.117532	0.192506	0.0355233	0.0178352	GCST90274774.tsv.gz	CALCA
inflammatory factors	0.636785	0.117409	0.192418	0.0354598	0.0179278	GCST90274774.tsv.gz	CALCB
inflammatory factors	0.564193	0.258118	0.116209	0.0531569	0.0083236	GCST90274774.tsv.gz	HTR1F
inflammatory factors	0.600504	0.155379	0.18159	0.0469704	0.0155568	GCST90274793.tsv.gz	CALCA
inflammatory factors	0.60058	0.155183	0.181478	0.0468759	0.0158826	GCST90274793.tsv.gz	CALCB
inflammatory factors	0.651323	0.170762	0.134155	0.0351637	0.00859737	GCST90274793.tsv.gz	HTR1F
inflammatory factors	0.652683	0.107052	0.197368	0.0323615	0.0105348	GCST90274821.tsv.gz	CALCA
inflammatory factors	0.650684	0.109122	0.196618	0.0329627	0.0106134	GCST90274821.tsv.gz	CALCB
inflammatory factors	0.629977	0.190995	0.129758	0.0393298	0.0099404	GCST90274821.tsv.gz	HTR1F
inflammatory factors	0.588227	0.171605	0.177877	0.0518821	0.010409	GCST90274831.tsv.gz	CALCA
inflammatory factors	0.566235	0.193764	0.1711	0.0585393	0.0103622	GCST90274831.tsv.gz	CALCB
inflammatory factors	0.679404	0.143947	0.139939	0.0296421	0.00706839	GCST90274831.tsv.gz	HTR1F
inflammatory factors	0.824381	0.0915969	0.0709402	0.00787696	0.0052049	GCST90274768.tsv.gz	HTR1D
inflammatory factors	0.921175	0.0441961	0.0313072	0.00150023	0.0018214	GCST90274768.tsv.gz	HTR1B
inflammatory factors	0.937667	0.0327857	0.027056	0.000944468	0.00154664	GCST90274768.tsv.gz	CALCRL
inflammatory factors	0.0193001	0.00485242	0.772477	0.194206	0.00916451	GCST90274768.tsv.gz	CACNA1A
inflammatory factors	0.661771	0.134761	0.161119	0.0328001	0.00954888	GCST90274768.tsv.gz	ATP1A2
inflammatory factors	0.912944	0.0385472	0.0439588	0.00185337	0.00269691	GCST90274768.tsv.gz	SCN1A
inflammatory factors	0.66785	0.247121	0.0574703	0.0212591	0.00630031	GCST90274774.tsv.gz	HTR1D
inflammatory factors	0.924588	0.040671	0.0314232	0.00138031	0.00193785	GCST90274774.tsv.gz	HTR1B
inflammatory factors	0.93246	0.0377407	0.0269057	0.00108718	0.00180675	GCST90274774.tsv.gz	CALCRL
inflammatory factors	0.0196854	0.00436906	0.787895	0.174856	0.0131944	GCST90274774.tsv.gz	CACNA1A
inflammatory factors	0.542821	0.246433	0.132158	0.0599792	0.0186095	GCST90274774.tsv.gz	ATP1A2
inflammatory factors	0.913093	0.0384797	0.0439659	0.00185021	0.00261127	GCST90274774.tsv.gz	SCN1A
inflammatory factors	0.815736	0.0989582	0.0701963	0.00850902	0.00660019	GCST90274793.tsv.gz	HTR1D
inflammatory factors	0.898659	0.0661868	0.0305419	0.00224707	0.00236541	GCST90274793.tsv.gz	HTR1B
inflammatory factors	0.921693	0.0479472	0.026595	0.00138111	0.00238379	GCST90274793.tsv.gz	CALCRL
inflammatory factors	0.019977	0.00419242	0.799568	0.167791	0.00847229	GCST90274793.tsv.gz	CACNA1A
inflammatory factors	0.664645	0.132325	0.161523	0.0321484	0.0093592	GCST90274793.tsv.gz	ATP1A2
inflammatory factors	0.916504	0.0347529	0.04403	0.00166653	0.00304633	GCST90274793.tsv.gz	SCN1A
inflammatory factors	0.807148	0.108232	0.0694573	0.00930781	0.00585454	GCST90274821.tsv.gz	HTR1D
inflammatory factors	0.914138	0.0509994	0.031068	0.00173121	0.0020637	GCST90274821.tsv.gz	HTR1B
inflammatory factors	0.883545	0.0848312	0.0254943	0.00244408	0.00368502	GCST90274821.tsv.gz	CALCRL
inflammatory factors	0.0192259	0.00497102	0.769507	0.198955	0.00734084	GCST90274821.tsv.gz	CACNA1A
inflammatory factors	0.62625	0.168078	0.15247	0.040909	0.0122928	GCST90274821.tsv.gz	ATP1A2
inflammatory factors	0.900963	0.0503942	0.0433819	0.00242367	0.0028374	GCST90274821.tsv.gz	SCN1A
inflammatory factors	0.817923	0.0969121	0.0703845	0.0083331	0.00644746	GCST90274831.tsv.gz	HTR1D
inflammatory factors	0.92889	0.0364824	0.0315694	0.00123808	0.00182023	GCST90274831.tsv.gz	HTR1B
inflammatory factors	0.91157	0.0572718	0.0263029	0.00164934	0.00320566	GCST90274831.tsv.gz	CALCRL
inflammatory factors	0.0200556	0.00408833	0.802715	0.163624	0.00951718	GCST90274831.tsv.gz	CACNA1A
inflammatory factors	0.658446	0.136712	0.160309	0.0332734	0.0112605	GCST90274831.tsv.gz	ATP1A2
inflammatory factors	0.902704	0.047417	0.0434657	0.00227902	0.00413418	GCST90274831.tsv.gz	SCN1A

## Sheet: Supplementary Tables 5
type	filename	gene	SNP	SNP.PP.H4
immunocyte	ebi-a-GCST90001502.txt.gz	HTR1F	rs1004583939	0.135864
immunocyte	ebi-a-GCST90001610.txt.gz	HTR1F	rs1004583939	0.152383
immunocyte	ebi-a-GCST90001614.txt.gz	HTR1F	rs1004583939	0.111818
immunocyte	ebi-a-GCST90001627.txt.gz	HTR1F	rs1004583939	0.0626292
immunocyte	ebi-a-GCST90001667.txt.gz	HTR1F	rs1004583939	0.14716
immunocyte	ebi-a-GCST90001746.txt.gz	HTR1F	rs1004583939	0.146711
immunocyte	ebi-a-GCST90001758.txt.gz	HTR1F	rs1004583939	0.153219
immunocyte	ebi-a-GCST90001767.txt.gz	HTR1F	rs1004583939	0.137173
immunocyte	ebi-a-GCST90001863.txt.gz	HTR1F	rs1004583939	0.145433
immunocyte	ebi-a-GCST90001927.txt.gz	HTR1F	rs1004583939	0.136776
immunocyte	ebi-a-GCST90001933.txt.gz	HTR1F	rs1004583939	0.150903
immunocyte	ebi-a-GCST90001978.txt.gz	HTR1F	rs1004583939	0.152906
immunocyte	ebi-a-GCST90001999.txt.gz	HTR1F	rs1004583939	0.14739
immunocyte	ebi-a-GCST90002055.txt.gz	HTR1F	rs1004583939	0.128576
intestinal flora	GCST90032357.txt.gz	CACNA1A	rs10164392	0.475758
metabolin	GCST90200015	CALCRL	rs10171607	0.0196993
intestinal flora	GCST90032571.txt.gz	SCN1A	rs10210720	0.0986236
metabolin	GCST90199743	CALCRL	rs10497674	0.00631469
intestinal flora	GCST90032574.txt.gz	HTR1D	rs10799763	0.0672775
metabolin	GCST90200469	HTR1D	rs111617578	0.0295108
metabolin	GCST90200070	SCN1A	rs111892692	0.0164266
metabolin	GCST90200578	SCN1A	rs111892692	0.0277828
metabolin	GCST90199923	SCN1A	rs112556765	0.0366871
metabolin	GCST90199986	SCN1A	rs112556765	0.0123204
metabolin	GCST90200614	SCN1A	rs112556765	0.0584196
metabolin	GCST90200635	SCN1A	rs112556765	0.0107475
metabolin	GCST90200709	SCN1A	rs112556765	0.0180207
metabolin	GCST90200929	SCN1A	rs112556765	0.0143986
immunocyte	ebi-a-GCST90001502.txt.gz	SCN1A	rs112556765	0.0708956
immunocyte	ebi-a-GCST90001610.txt.gz	SCN1A	rs112556765	0.0777554
immunocyte	ebi-a-GCST90001614.txt.gz	SCN1A	rs112556765	0.0657308
immunocyte	ebi-a-GCST90001627.txt.gz	SCN1A	rs112556765	0.0775618
immunocyte	ebi-a-GCST90001674.txt.gz	SCN1A	rs112556765	0.0837077
immunocyte	ebi-a-GCST90001746.txt.gz	SCN1A	rs112556765	0.0909687
immunocyte	ebi-a-GCST90001758.txt.gz	SCN1A	rs112556765	0.0856144
immunocyte	ebi-a-GCST90001767.txt.gz	SCN1A	rs112556765	0.0629516
immunocyte	ebi-a-GCST90001863.txt.gz	SCN1A	rs112556765	0.0694846
immunocyte	ebi-a-GCST90001873.txt.gz	SCN1A	rs112556765	0.076819
immunocyte	ebi-a-GCST90001876.txt.gz	SCN1A	rs112556765	0.0712665
immunocyte	ebi-a-GCST90001880.txt.gz	SCN1A	rs112556765	0.0705412
immunocyte	ebi-a-GCST90001881.txt.gz	SCN1A	rs112556765	0.0749111
immunocyte	ebi-a-GCST90001927.txt.gz	SCN1A	rs112556765	0.0915052
immunocyte	ebi-a-GCST90001933.txt.gz	SCN1A	rs112556765	0.0759126
immunocyte	ebi-a-GCST90001978.txt.gz	SCN1A	rs112556765	0.0810632
immunocyte	ebi-a-GCST90001999.txt.gz	SCN1A	rs112556765	0.0730107
immunocyte	ebi-a-GCST90002055.txt.gz	SCN1A	rs112556765	0.0836777
immunocyte	ebi-a-GCST90001863.txt.gz	ATP1A2	rs11265380	0.0349259
metabolin	GCST90200506	SCN1A	rs113703749	0.0182125
intestinal flora	GCST90032357.txt.gz	HTR1F	rs113917095	0.0323232
immunocyte	ebi-a-GCST90001667.txt.gz	CALCRL	rs114105005	0.0368787
inflammatory factors	GCST90274793.tsv.gz	CALCRL	rs114174015	0.0967264
immunocyte	ebi-a-GCST90001880.txt.gz	CALCRL	rs114290428	0.0228601
inflammatory factors	GCST90274768.tsv.gz	CALCRL	rs114290428	0.0311568
inflammatory factors	GCST90274774.tsv.gz	CALCRL	rs114330972	0.0908516
inflammatory factors	GCST90274774.tsv.gz	HTR1F	rs114470603	0.0170639
metabolin	GCST90200953	HTR1F	rs114502235	0.0199239
metabolin	GCST90200236	CALCRL	rs114523457	0.00626314
metabolin	GCST90200237	SCN1A	rs114561884	0.0234636
metabolin	GCST90200341	HTR1D	rs114691544	0.0219128
metabolin	GCST90200953	SCN1A	rs114708641	0.0692364
metabolin	GCST90199897	CALCRL	rs114822415	0.0185891
metabolin	GCST90200212	CALCRL	rs114822415	0.00700845
metabolin	GCST90200070	CALCRL	rs114829206	0.00720474
metabolin	GCST90200609	HTR1F	rs114848200	0.0177833
metabolin	GCST90200011	HTR1F	rs114931419	0.0135872
metabolin	GCST90200562	HTR1F	rs114931419	0.0221473
metabolin	GCST90200808	HTR1F	rs114931419	0.0194264
metabolin	GCST90199626	CALCRL	rs115020780	0.0047249
intestinal flora	GCST90032490.txt.gz	CALCRL	rs115144780	0.0323338
metabolin	GCST90200929	ATP1A2	rs115263204	0.364086
immunocyte	ebi-a-GCST90001978.txt.gz	ATP1A2	rs115263204	0.0233625
metabolin	GCST90200011	HTR1D	rs115378513	0.0649936
metabolin	GCST90200015	ATP1A2	rs115585839	0.0442638
metabolin	GCST90200217	CALCRL	rs115813513	0.00597868
metabolin	GCST90200709	CALCRL	rs115813513	0.00425693
metabolin	GCST90200929	CALCRL	rs115813513	0.00618627
metabolin	GCST90199789	HTR1D	rs11581635	0.0427889
metabolin	GCST90199869	HTR1D	rs11581635	0.0169081
metabolin	GCST90199969	HTR1D	rs11581635	0.0231435
metabolin	GCST90199986	HTR1D	rs11581635	0.0286747
metabolin	GCST90200070	HTR1D	rs11581635	0.045993
metabolin	GCST90200271	HTR1D	rs11581635	0.125123
metabolin	GCST90200305	HTR1D	rs11581635	0.0226616
metabolin	GCST90200578	HTR1D	rs11581635	0.0283179
metabolin	GCST90200614	HTR1D	rs11581635	0.0640797
metabolin	GCST90200654	HTR1D	rs11581635	0.0176728
metabolin	GCST90200732	HTR1D	rs11581635	0.0191011
metabolin	GCST90200237	HTR1F	rs115821203	0.104203
intestinal flora	GCST90032357.txt.gz	SCN1A	rs116130513	0.199588
metabolin	GCST90200070	HTR1F	rs116386370	0.0356523
metabolin	GCST90200351	HTR1D	rs116568582	0.0541703
immunocyte	ebi-a-GCST90001767.txt.gz	CACNA1A	rs11669746	0.343269
metabolin	GCST90200310	HTR1D	rs116725289	0.0494221
metabolin	GCST90200402	ATP1A2	rs116794265	0.0546601
metabolin	GCST90200469	CALCA	rs117571513	0.0569995
metabolin	GCST90200609	CALCA	rs117571513	0.232416
metabolin	GCST90200609	CALCB	rs117571513	0.121761
metabolin	GCST90200808	CALCRL	rs117600725	0.00374704
metabolin	GCST90199919	HTR1B	rs117636220	0.0143959
metabolin	GCST90200011	HTR1B	rs117636220	0.0128865
metabolin	GCST90200015	HTR1B	rs117636220	0.025696
metabolin	GCST90200149	HTR1B	rs117636220	0.00943055
metabolin	GCST90200271	HTR1B	rs117636220	0.0875158
metabolin	GCST90200953	HTR1B	rs117636220	0.18459
metabolin	GCST90199743	CALCA	rs117740298	0.0415371
metabolin	GCST90199743	CALCB	rs117740298	0.0442981
metabolin	GCST90199756	CALCA	rs117740298	0.0417465
metabolin	GCST90199756	CALCB	rs117740298	0.0414552
metabolin	GCST90199789	CALCA	rs117740298	0.0673912
metabolin	GCST90199789	CALCB	rs117740298	0.0653286
metabolin	GCST90199802	CALCA	rs117740298	0.0415493
metabolin	GCST90199802	CALCB	rs117740298	0.041277
metabolin	GCST90199846	CALCA	rs117740298	0.0432295
metabolin	GCST90199846	CALCB	rs117740298	0.042577
metabolin	GCST90199869	CALCA	rs117740298	0.0444142
metabolin	GCST90199869	CALCB	rs117740298	0.043803
metabolin	GCST90199897	CALCA	rs117740298	0.0435367
metabolin	GCST90199897	CALCB	rs117740298	0.0422713
metabolin	GCST90199919	CALCA	rs117740298	0.0640279
metabolin	GCST90199919	CALCB	rs117740298	0.0622529
metabolin	GCST90199969	CALCA	rs117740298	0.148225
metabolin	GCST90199969	CALCB	rs117740298	0.146643
metabolin	GCST90199986	CALCA	rs117740298	0.0581895
metabolin	GCST90199986	CALCB	rs117740298	0.0576181
metabolin	GCST90200011	CALCA	rs117740298	0.0576348
metabolin	GCST90200011	CALCB	rs117740298	0.0567833
metabolin	GCST90200136	CALCA	rs117740298	0.0470737
metabolin	GCST90200136	CALCB	rs117740298	0.0467968
metabolin	GCST90200149	CALCA	rs117740298	0.045825
metabolin	GCST90200149	CALCB	rs117740298	0.0453479
metabolin	GCST90200212	CALCA	rs117740298	0.0511749
metabolin	GCST90200212	CALCB	rs117740298	0.050617
metabolin	GCST90200236	CALCA	rs117740298	0.0421001
metabolin	GCST90200236	CALCB	rs117740298	0.0417818
metabolin	GCST90200271	CALCA	rs117740298	0.044197
metabolin	GCST90200271	CALCB	rs117740298	0.0437601
metabolin	GCST90200341	CALCB	rs117740298	0.0474705
metabolin	GCST90200402	CALCA	rs117740298	0.0481762
metabolin	GCST90200402	CALCB	rs117740298	0.0473357
metabolin	GCST90200614	CALCA	rs117740298	0.0430546
metabolin	GCST90200614	CALCB	rs117740298	0.0425023
metabolin	GCST90200654	CALCA	rs117740298	0.0749546
metabolin	GCST90200654	CALCB	rs117740298	0.0757075
metabolin	GCST90200732	CALCA	rs117740298	0.0385297
metabolin	GCST90200732	CALCB	rs117740298	0.0366803
metabolin	GCST90200812	CALCA	rs117740298	0.0438805
metabolin	GCST90200812	CALCB	rs117740298	0.0432925
metabolin	GCST90201015	CALCA	rs117740298	0.0437762
metabolin	GCST90201015	CALCB	rs117740298	0.043925
inflammatory factors	GCST90274774.tsv.gz	CALCA	rs117740298	0.163841
inflammatory factors	GCST90274774.tsv.gz	CALCB	rs117740298	0.163057
metabolin	GCST90199626	HTR1D	rs118001330	0.0185297
metabolin	GCST90199802	HTR1D	rs118001330	0.0193549
metabolin	GCST90199897	HTR1D	rs118001330	0.0181181
metabolin	GCST90200015	HTR1D	rs118001330	0.0206666
metabolin	GCST90200136	HTR1D	rs118001330	0.0180875
metabolin	GCST90200149	HTR1D	rs118001330	0.0183581
metabolin	GCST90200217	HTR1D	rs118001330	0.0171242
metabolin	GCST90200609	HTR1D	rs118001330	0.0172088
metabolin	GCST90200635	HTR1D	rs118001330	0.0173724
metabolin	GCST90200709	HTR1D	rs118001330	0.0178861
metabolin	GCST90200808	HTR1D	rs118001330	0.0177553
metabolin	GCST90200812	HTR1D	rs118001330	0.0212373
metabolin	GCST90200827	HTR1D	rs118001330	0.0144296
metabolin	GCST90200595	ATP1A2	rs11804473	0.0372016
inflammatory factors	GCST90274793.tsv.gz	CALCA	rs118114219	0.319703
inflammatory factors	GCST90274793.tsv.gz	CALCB	rs118114219	0.313045
inflammatory factors	GCST90274831.tsv.gz	HTR1B	rs118134125	0.0197644
metabolin	GCST90200578	ATP1A2	rs12118914	0.0447296
immunocyte	ebi-a-GCST90002055.txt.gz	CALCRL	rs12329073	0.025598
inflammatory factors	GCST90274768.tsv.gz	HTR1D	rs12410865	0.049993
metabolin	GCST90200812	HTR1F	rs12486756	0.0137842
metabolin	GCST90200595	HTR1D	rs12725555	0.0340866
metabolin	GCST90200305	ATP1A2	rs12750836	0.0448893
metabolin	GCST90200506	ATP1A2	rs12750836	0.0427357
immunocyte	ebi-a-GCST90001667.txt.gz	ATP1A2	rs12750836	0.0364319
metabolin	GCST90199869	SCN1A	rs12999775	0.0463811
immunocyte	ebi-a-GCST90001873.txt.gz	HTR1B	rs13213391	0.0503108
metabolin	GCST90199626	CALCA	rs137888246	0.082679
metabolin	GCST90199626	CALCB	rs137888246	0.0831125
metabolin	GCST90199832	SCN1A	rs137950241	0.0320837
inflammatory factors	GCST90274793.tsv.gz	HTR1D	rs137969831	0.063243
inflammatory factors	GCST90274831.tsv.gz	HTR1D	rs137969831	0.0938982
metabolin	GCST90199832	HTR1B	rs138163617	0.00924401
metabolin	GCST90199789	ATP1A2	rs138164837	0.103886
metabolin	GCST90200305	SCN1A	rs138298281	0.0265644
intestinal flora	GCST90032357.txt.gz	HTR1D	rs138431960	0.0648477
intestinal flora	GCST90032434.txt.gz	HTR1D	rs138431960	0.0620306
intestinal flora	GCST90032571.txt.gz	HTR1D	rs138431960	0.0781953
intestinal flora	GCST90032577.txt.gz	HTR1D	rs138431960	0.0350721
intestinal flora	GCST90032622.txt.gz	HTR1D	rs138431960	0.0543739
intestinal flora	GCST90032643.txt.gz	HTR1D	rs138431960	0.0556694
immunocyte	ebi-a-GCST90001863.txt.gz	CALCRL	rs139332100	0.0178931
metabolin	GCST90199756	HTR1D	rs139354964	0.0211825
metabolin	GCST90200149	HTR1F	rs139481520	0.0105412
immunocyte	ebi-a-GCST90001674.txt.gz	HTR1F	rs139698611	0.0391456
metabolin	GCST90200654	ATP1A2	rs139843064	0.0249825
inflammatory factors	GCST90274768.tsv.gz	HTR1B	rs139868054	0.0185648
metabolin	GCST90200212	HTR1B	rs139927603	0.233496
metabolin	GCST90200351	CALCRL	rs140144213	0.0053151
metabolin	GCST90199832	CALCA	rs140304538	0.0517636
metabolin	GCST90199832	CALCB	rs140304538	0.0509495
metabolin	GCST90200305	CALCA	rs140304538	0.0514352
metabolin	GCST90200305	CALCB	rs140304538	0.0512079
metabolin	GCST90200310	CALCA	rs140304538	0.0542769
metabolin	GCST90200310	CALCB	rs140304538	0.054003
metabolin	GCST90200506	CALCA	rs140304538	0.132206
metabolin	GCST90200506	CALCB	rs140304538	0.131311
metabolin	GCST90200595	CALCA	rs140304538	0.0697275
metabolin	GCST90200595	CALCB	rs140304538	0.0688076
metabolin	GCST90200635	CALCA	rs140304538	0.0962775
metabolin	GCST90200635	CALCB	rs140304538	0.0969401
metabolin	GCST90200808	CALCA	rs140304538	0.0657075
metabolin	GCST90200808	CALCB	rs140304538	0.0650244
metabolin	GCST90200827	CALCA	rs140304538	0.0460593
metabolin	GCST90200827	CALCB	rs140304538	0.0457927
metabolin	GCST90200953	CALCA	rs140304538	0.0549836
metabolin	GCST90200953	CALCB	rs140304538	0.0541405
immunocyte	ebi-a-GCST90001746.txt.gz	CALCA	rs140304538	0.0969293
immunocyte	ebi-a-GCST90001746.txt.gz	CALCB	rs140304538	0.0942859
immunocyte	ebi-a-GCST90001758.txt.gz	CALCA	rs140304538	0.0960039
immunocyte	ebi-a-GCST90001758.txt.gz	CALCB	rs140304538	0.0943512
immunocyte	ebi-a-GCST90001767.txt.gz	CALCA	rs140304538	0.10056
immunocyte	ebi-a-GCST90001767.txt.gz	CALCB	rs140304538	0.0936909
immunocyte	ebi-a-GCST90001999.txt.gz	CALCA	rs140304538	0.100065
immunocyte	ebi-a-GCST90001999.txt.gz	CALCB	rs140304538	0.0927531
metabolin	GCST90200341	HTR1B	rs140523947	0.0418244
immunocyte	ebi-a-GCST90001525.txt.gz	HTR1B	rs1407320	0.026002
inflammatory factors	GCST90274821.tsv.gz	HTR1B	rs140835983	0.0421354
metabolin	GCST90199743	HTR1D	rs141358259	0.0379839
metabolin	GCST90200506	HTR1D	rs141445403	0.017574
metabolin	GCST90199743	HTR1B	rs141822418	0.0275858
metabolin	GCST90199923	HTR1B	rs141822418	0.0532995
metabolin	GCST90199986	HTR1B	rs141822418	0.0238376
metabolin	GCST90200217	HTR1B	rs141822418	0.0106224
metabolin	GCST90200402	HTR1B	rs141822418	0.0109544
metabolin	GCST90200812	HTR1B	rs141822418	0.0258551
metabolin	GCST90200827	HTR1B	rs141822418	0.0195897
metabolin	GCST90199923	CALCA	rs142224422	0.041995
metabolin	GCST90199923	CALCB	rs142224422	0.036477
metabolin	GCST90200562	CALCA	rs142224422	0.09093
metabolin	GCST90200562	CALCB	rs142224422	0.0959387
immunocyte	ebi-a-GCST90001746.txt.gz	CALCRL	rs142550955	0.0194429
immunocyte	ebi-a-GCST90001758.txt.gz	CALCRL	rs142550955	0.0371617
metabolin	GCST90199846	HTR1F	rs142554114	0.0159889
intestinal flora	GCST90032622.txt.gz	CACNA1A	rs142630585	0.0969459
metabolin	GCST90201015	HTR1F	rs143330570	0.0328212
intestinal flora	GCST90032389.txt.gz	ATP1A2	rs143345984	0.152876
metabolin	GCST90200070	CALCA	rs143353774	0.0506146
metabolin	GCST90200070	CALCB	rs143353774	0.0509774
metabolin	GCST90200562	HTR1B	rs143450248	0.230064
intestinal flora	GCST90032388.txt.gz	SCN1A	rs144385186	0.0616718
intestinal flora	GCST90032389.txt.gz	SCN1A	rs144385186	0.0638072
intestinal flora	GCST90032434.txt.gz	SCN1A	rs144385186	0.0892171
intestinal flora	GCST90032490.txt.gz	SCN1A	rs144385186	0.117068
intestinal flora	GCST90032574.txt.gz	SCN1A	rs144385186	0.146796
intestinal flora	GCST90032577.txt.gz	SCN1A	rs144385186	0.0998492
intestinal flora	GCST90032643.txt.gz	SCN1A	rs144385186	0.100856
metabolin	GCST90200310	SCN1A	rs144403479	0.00702152
metabolin	GCST90200812	SCN1A	rs144503821	0.0114327
inflammatory factors	GCST90274774.tsv.gz	ATP1A2	rs144587120	0.146882
metabolin	GCST90200609	CALCRL	rs144803407	0.00582008
inflammatory factors	GCST90274821.tsv.gz	CALCRL	rs144964598	0.210254
metabolin	GCST90200635	ATP1A2	rs145215667	0.0301287
metabolin	GCST90200341	CALCRL	rs145844358	0.0140237
metabolin	GCST90200827	CALCRL	rs145844358	0.0705875
metabolin	GCST90200469	CALCB	rs145936394	0.107315
metabolin	GCST90200595	HTR1B	rs145982008	0.0179083
metabolin	GCST90200237	CALCA	rs146317046	0.0441151
metabolin	GCST90200237	CALCB	rs146317046	0.0384172
metabolin	GCST90200351	CALCA	rs146317046	0.0698856
metabolin	GCST90200351	CALCB	rs146317046	0.0698614
metabolin	GCST90200814	CALCA	rs146317046	0.0706789
metabolin	GCST90200814	CALCB	rs146317046	0.0699592
metabolin	GCST90200929	CALCA	rs146317046	0.0866516
metabolin	GCST90200929	CALCB	rs146317046	0.0874709
metabolin	GCST90200271	CALCRL	rs146436592	0.0229437
metabolin	GCST90199897	SCN1A	rs146469656	0.00786758
metabolin	GCST90199626	HTR1B	rs147841154	0.00914494
metabolin	GCST90200070	HTR1B	rs147841154	0.0127855
metabolin	GCST90200310	HTR1B	rs147841154	0.00934093
metabolin	GCST90200654	HTR1B	rs147841154	0.0176397
metabolin	GCST90200732	HTR1B	rs147841154	0.0217983
intestinal flora	GCST90032245.txt.gz	CACNA1A	rs147900693	0.0878363
intestinal flora	GCST90032246.txt.gz	CACNA1A	rs147900693	0.0659997
intestinal flora	GCST90032388.txt.gz	CACNA1A	rs147900693	0.0503741
intestinal flora	GCST90032389.txt.gz	CACNA1A	rs147900693	0.055861
intestinal flora	GCST90032490.txt.gz	CACNA1A	rs147900693	0.0642423
intestinal flora	GCST90032571.txt.gz	CACNA1A	rs147900693	0.012426
intestinal flora	GCST90032574.txt.gz	CACNA1A	rs147900693	0.073728
metabolin	GCST90200812	CALCRL	rs147924904	0.0100773
immunocyte	ebi-a-GCST90001502.txt.gz	CALCA	rs148022286	0.0899239
immunocyte	ebi-a-GCST90001502.txt.gz	CALCB	rs148022286	0.0813164
immunocyte	ebi-a-GCST90001520.txt.gz	CALCA	rs148022286	0.105139
immunocyte	ebi-a-GCST90001520.txt.gz	CALCB	rs148022286	0.100746
immunocyte	ebi-a-GCST90001524.txt.gz	CALCA	rs148022286	0.125755
immunocyte	ebi-a-GCST90001524.txt.gz	CALCB	rs148022286	0.118839
immunocyte	ebi-a-GCST90001610.txt.gz	CALCA	rs148022286	0.167178
immunocyte	ebi-a-GCST90001610.txt.gz	CALCB	rs148022286	0.154481
immunocyte	ebi-a-GCST90001614.txt.gz	CALCA	rs148022286	0.14083
immunocyte	ebi-a-GCST90001614.txt.gz	CALCB	rs148022286	0.127612
immunocyte	ebi-a-GCST90001627.txt.gz	CALCA	rs148022286	0.154582
immunocyte	ebi-a-GCST90001627.txt.gz	CALCB	rs148022286	0.139013
immunocyte	ebi-a-GCST90001667.txt.gz	CALCA	rs148022286	0.0858523
immunocyte	ebi-a-GCST90001667.txt.gz	CALCB	rs148022286	0.0792172
immunocyte	ebi-a-GCST90001674.txt.gz	CALCA	rs148022286	0.119854
immunocyte	ebi-a-GCST90001674.txt.gz	CALCB	rs148022286	0.114403
immunocyte	ebi-a-GCST90001863.txt.gz	CALCA	rs148022286	0.146031
immunocyte	ebi-a-GCST90001863.txt.gz	CALCB	rs148022286	0.138155
immunocyte	ebi-a-GCST90001873.txt.gz	CALCA	rs148022286	0.127988
immunocyte	ebi-a-GCST90001873.txt.gz	CALCB	rs148022286	0.121078
immunocyte	ebi-a-GCST90001876.txt.gz	CALCA	rs148022286	0.12207
immunocyte	ebi-a-GCST90001876.txt.gz	CALCB	rs148022286	0.113502
immunocyte	ebi-a-GCST90001880.txt.gz	CALCA	rs148022286	0.126349
immunocyte	ebi-a-GCST90001880.txt.gz	CALCB	rs148022286	0.116284
immunocyte	ebi-a-GCST90001881.txt.gz	CALCA	rs148022286	0.124333
immunocyte	ebi-a-GCST90001881.txt.gz	CALCB	rs148022286	0.116624
immunocyte	ebi-a-GCST90001927.txt.gz	CALCA	rs148022286	0.172489
immunocyte	ebi-a-GCST90001927.txt.gz	CALCB	rs148022286	0.163144
immunocyte	ebi-a-GCST90001933.txt.gz	CALCA	rs148022286	0.120373
immunocyte	ebi-a-GCST90001933.txt.gz	CALCB	rs148022286	0.116046
immunocyte	ebi-a-GCST90001978.txt.gz	CALCA	rs148022286	0.107774
immunocyte	ebi-a-GCST90001978.txt.gz	CALCB	rs148022286	0.104333
immunocyte	ebi-a-GCST90002043.txt.gz	CALCA	rs148022286	0.166745
immunocyte	ebi-a-GCST90002043.txt.gz	CALCB	rs148022286	0.159175
immunocyte	ebi-a-GCST90002055.txt.gz	CALCA	rs148022286	0.164311
immunocyte	ebi-a-GCST90002055.txt.gz	CALCB	rs148022286	0.156107
immunocyte	ebi-a-GCST90001627.txt.gz	CALCRL	rs148154993	0.0277452
metabolin	GCST90200814	CALCRL	rs148811275	0.021504
metabolin	GCST90200136	CALCRL	rs148960933	0.00664697
metabolin	GCST90200808	SCN1A	rs148998410	0.014483
intestinal flora	GCST90032434.txt.gz	HTR1F	rs149132310	0.138574
intestinal flora	GCST90032577.txt.gz	HTR1F	rs149132310	0.0344038
intestinal flora	GCST90032622.txt.gz	HTR1F	rs149132310	0.253555
inflammatory factors	GCST90274768.tsv.gz	HTR1F	rs149198192	0.0397327
metabolin	GCST90200217	CALCA	rs149261869	0.0719866
metabolin	GCST90200217	CALCB	rs149261869	0.0717757
metabolin	GCST90200709	CALCA	rs149261869	0.179592
metabolin	GCST90200709	CALCB	rs149261869	0.181406
intestinal flora	GCST90032245.txt.gz	SCN1A	rs149400356	0.116011
intestinal flora	GCST90032246.txt.gz	SCN1A	rs149400356	0.106754
metabolin	GCST90200149	SCN1A	rs150001998	0.0856854
metabolin	GCST90200015	CALCA	rs150027580	0.125503
metabolin	GCST90200015	CALCB	rs150027580	0.117967
immunocyte	ebi-a-GCST90001502.txt.gz	CALCRL	rs150061104	0.0362967
immunocyte	ebi-a-GCST90001933.txt.gz	CALCRL	rs150061104	0.0389121
immunocyte	ebi-a-GCST90001978.txt.gz	HTR1D	rs150077038	0.0354938
metabolin	GCST90199789	HTR1B	rs150381270	0.0460705
metabolin	GCST90199802	HTR1B	rs150381270	0.0176949
metabolin	GCST90199846	HTR1B	rs150381270	0.0156281
metabolin	GCST90199969	HTR1B	rs150381270	0.0124689
metabolin	GCST90200236	HTR1B	rs150381270	0.0186074
metabolin	GCST90200237	HTR1B	rs150381270	0.0399358
metabolin	GCST90200305	HTR1B	rs150381270	0.0318486
metabolin	GCST90200351	HTR1B	rs150381270	0.0167001
metabolin	GCST90200469	HTR1B	rs150381270	0.0088499
metabolin	GCST90200506	HTR1B	rs150381270	0.0117717
metabolin	GCST90200578	HTR1B	rs150381270	0.00991423
metabolin	GCST90200609	HTR1B	rs150381270	0.0163983
metabolin	GCST90200614	HTR1B	rs150381270	0.00869913
metabolin	GCST90200635	HTR1B	rs150381270	0.0111133
metabolin	GCST90200709	HTR1B	rs150381270	0.00885718
metabolin	GCST90200814	HTR1B	rs150381270	0.00905315
metabolin	GCST90200827	SCN1A	rs150405089	0.0187715
immunocyte	ebi-a-GCST90001667.txt.gz	HTR1B	rs150622350	0.0339243
inflammatory factors	GCST90274774.tsv.gz	HTR1B	rs150622350	0.0323616
inflammatory factors	GCST90274768.tsv.gz	CALCA	rs150675526	0.0601076
inflammatory factors	GCST90274768.tsv.gz	CALCB	rs150675526	0.0606571
inflammatory factors	GCST90274821.tsv.gz	CALCA	rs150675526	0.0506479
inflammatory factors	GCST90274821.tsv.gz	CALCB	rs150675526	0.0501225
inflammatory factors	GCST90274831.tsv.gz	CALCA	rs150675526	0.058375
inflammatory factors	GCST90274831.tsv.gz	CALCB	rs150675526	0.0564453
metabolin	GCST90199919	SCN1A	rs150946042	0.0195806
intestinal flora	GCST90032290.txt.gz	CALCRL	rs151247040	0.0238688
intestinal flora	GCST90032357.txt.gz	CALCRL	rs151247040	0.0260862
intestinal flora	GCST90032577.txt.gz	CALCRL	rs151247040	0.0143235
immunocyte	ebi-a-GCST90001758.txt.gz	ATP1A2	rs16831234	0.0678022
intestinal flora	GCST90032290.txt.gz	ATP1A2	rs16831989	0.0444364
intestinal flora	GCST90032388.txt.gz	CALCRL	rs17701023	0.211202
intestinal flora	GCST90032389.txt.gz	CALCRL	rs17701023	0.257279
metabolin	GCST90200305	CALCRL	rs180853386	0.0154467
immunocyte	ebi-a-GCST90001610.txt.gz	HTR1B	rs180983866	0.112989
metabolin	GCST90200814	SCN1A	rs181544954	0.0378848
intestinal flora	GCST90032290.txt.gz	SCN1A	rs182261529	0.0515892
metabolin	GCST90200814	HTR1D	rs183265520	0.0177382
metabolin	GCST90200929	HTR1D	rs183265520	0.0272041
inflammatory factors	GCST90274821.tsv.gz	HTR1D	rs183265520	0.0393281
metabolin	GCST90200827	CACNA1A	rs183332676	0.780832
intestinal flora	GCST90032290.txt.gz	HTR1D	rs183896303	0.0604513
metabolin	GCST90199897	HTR1F	rs183905217	0.0297375
metabolin	GCST90200595	HTR1F	rs183905217	0.0133052
metabolin	GCST90200654	HTR1F	rs183905217	0.0219064
immunocyte	ebi-a-GCST90001525.txt.gz	HTR1F	rs183905217	0.0248621
metabolin	GCST90200237	CALCRL	rs184175034	0.0123165
metabolin	GCST90200635	CALCRL	rs184310986	0.00549688
metabolin	GCST90200341	HTR1F	rs184322292	0.0141115
metabolin	GCST90200149	CALCRL	rs184927247	0.0224623
metabolin	GCST90201015	HTR1B	rs185288575	0.0335779
metabolin	GCST90200578	CALCRL	rs185358980	0.00856987
metabolin	GCST90200402	SCN1A	rs186060518	0.0108479
immunocyte	ebi-a-GCST90001610.txt.gz	CALCRL	rs186075102	0.0318549
metabolin	GCST90200709	HTR1F	rs186310436	0.108167
metabolin	GCST90199969	SCN1A	rs186406220	0.0345751
metabolin	GCST90200015	SCN1A	rs186556751	0.0356971
metabolin	GCST90199832	HTR1F	rs187123681	0.0154428
intestinal flora	GCST90032571.txt.gz	ATP1A2	rs187220735	0.0339061
metabolin	GCST90199626	SCN1A	rs187747348	0.020545
metabolin	GCST90199756	SCN1A	rs187747348	0.0189193
metabolin	GCST90199789	SCN1A	rs187747348	0.0404391
metabolin	GCST90199846	SCN1A	rs187747348	0.0135746
metabolin	GCST90200136	SCN1A	rs187747348	0.0253135
metabolin	GCST90200212	SCN1A	rs187747348	0.0150741
metabolin	GCST90200236	SCN1A	rs187747348	0.00809283
metabolin	GCST90200654	SCN1A	rs187747348	0.0078099
metabolin	GCST90200732	SCN1A	rs187747348	0.0138365
inflammatory factors	GCST90274774.tsv.gz	SCN1A	rs187747348	0.0340121
inflammatory factors	GCST90274821.tsv.gz	SCN1A	rs187747348	0.0386803
metabolin	GCST90199802	CALCRL	rs188736597	0.0190047
metabolin	GCST90199919	HTR1F	rs189043167	0.195809
metabolin	GCST90200814	HTR1F	rs189427695	0.0125229
immunocyte	ebi-a-GCST90002043.txt.gz	HTR1F	rs189427695	0.0331623
metabolin	GCST90200562	CALCRL	rs189688688	0.00919338
metabolin	GCST90200341	SCN1A	rs190366016	0.023154
metabolin	GCST90199626	ATP1A2	rs190616767	0.0214096
metabolin	GCST90199756	ATP1A2	rs190616767	0.0238518
metabolin	GCST90199846	ATP1A2	rs190616767	0.024573
metabolin	GCST90199919	ATP1A2	rs190616767	0.0255636
metabolin	GCST90200136	ATP1A2	rs190616767	0.0342657
metabolin	GCST90200236	ATP1A2	rs190616767	0.0367817
metabolin	GCST90200237	ATP1A2	rs190616767	0.0313406
metabolin	GCST90200351	ATP1A2	rs190616767	0.0251363
metabolin	GCST90200614	ATP1A2	rs190616767	0.0267312
metabolin	GCST90200732	ATP1A2	rs190616767	0.037834
metabolin	GCST90200812	ATP1A2	rs190616767	0.106251
metabolin	GCST90200814	ATP1A2	rs190616767	0.0263594
inflammatory factors	GCST90274768.tsv.gz	ATP1A2	rs190616767	0.0545086
metabolin	GCST90200402	CALCRL	rs191384041	0.0421627
metabolin	GCST90200402	HTR1D	rs191555806	0.072071
metabolin	GCST90199869	HTR1F	rs192142854	0.0166382
metabolin	GCST90199969	HTR1F	rs192142854	0.0199306
metabolin	GCST90200236	HTR1F	rs192142854	0.0162572
metabolin	GCST90200635	HTR1F	rs192142854	0.0109766
immunocyte	ebi-a-GCST90001881.txt.gz	HTR1F	rs192142854	0.0113207
inflammatory factors	GCST90274821.tsv.gz	HTR1F	rs192142854	0.057884
metabolin	GCST90200506	CALCRL	rs193201867	0.00573193
metabolin	GCST90200469	CALCRL	rs200995174	0.0147272
metabolin	GCST90200732	CALCRL	rs200995174	0.0141761
metabolin	GCST90200827	ATP1A2	rs2369137	0.0704464
metabolin	GCST90199802	ATP1A2	rs2501320	0.36706
intestinal flora	GCST90032643.txt.gz	ATP1A2	rs2501347	0.0759767
intestinal flora	GCST90032245.txt.gz	HTR1D	rs2582022	0.0414133
intestinal flora	GCST90032246.txt.gz	HTR1D	rs2582022	0.0412356
inflammatory factors	GCST90274774.tsv.gz	HTR1D	rs2817889	0.066759
intestinal flora	GCST90032571.txt.gz	CALCRL	rs35002569	0.0731927
immunocyte	ebi-a-GCST90001999.txt.gz	ATP1A2	rs35161722	0.193071
immunocyte	ebi-a-GCST90001614.txt.gz	HTR1D	rs35203503	0.040775
metabolin	GCST90200271	ATP1A2	rs35622571	0.0749105
metabolin	GCST90200614	CALCRL	rs377062532	0.0285715
metabolin	GCST90201015	HTR1D	rs4073886	0.216941
immunocyte	ebi-a-GCST90001502.txt.gz	CACNA1A	rs4926144	0.440655
immunocyte	ebi-a-GCST90001524.txt.gz	CACNA1A	rs4926144	0.414329
immunocyte	ebi-a-GCST90001525.txt.gz	CACNA1A	rs4926144	0.369803
immunocyte	ebi-a-GCST90001610.txt.gz	CACNA1A	rs4926144	0.36088
immunocyte	ebi-a-GCST90001614.txt.gz	CACNA1A	rs4926144	0.303151
immunocyte	ebi-a-GCST90001627.txt.gz	CACNA1A	rs4926144	0.336465
immunocyte	ebi-a-GCST90001667.txt.gz	CACNA1A	rs4926144	0.333103
immunocyte	ebi-a-GCST90001746.txt.gz	CACNA1A	rs4926144	0.426155
immunocyte	ebi-a-GCST90001758.txt.gz	CACNA1A	rs4926144	0.362177
immunocyte	ebi-a-GCST90001863.txt.gz	CACNA1A	rs4926144	0.339958
immunocyte	ebi-a-GCST90001873.txt.gz	CACNA1A	rs4926144	0.387813
immunocyte	ebi-a-GCST90001876.txt.gz	CACNA1A	rs4926144	0.417443
immunocyte	ebi-a-GCST90001880.txt.gz	CACNA1A	rs4926144	0.454295
immunocyte	ebi-a-GCST90001881.txt.gz	CACNA1A	rs4926144	0.463562
immunocyte	ebi-a-GCST90001927.txt.gz	CACNA1A	rs4926144	0.424691
immunocyte	ebi-a-GCST90001933.txt.gz	CACNA1A	rs4926144	0.350342
immunocyte	ebi-a-GCST90001978.txt.gz	CACNA1A	rs4926144	0.307198
immunocyte	ebi-a-GCST90001999.txt.gz	CACNA1A	rs4926144	0.344476
immunocyte	ebi-a-GCST90002043.txt.gz	CACNA1A	rs4926144	0.348295
immunocyte	ebi-a-GCST90002055.txt.gz	CACNA1A	rs4926144	0.410934
metabolin	GCST90200271	SCN1A	rs532529948	0.00964429
intestinal flora	GCST90032245.txt.gz	HTR1B	rs540561238	0.231261
intestinal flora	GCST90032246.txt.gz	HTR1B	rs540561238	0.224882
intestinal flora	GCST90032622.txt.gz	HTR1B	rs540561238	0.168907
intestinal flora	GCST90032643.txt.gz	HTR1B	rs540561238	0.159005
metabolin	GCST90200929	HTR1B	rs541868906	0.0166094
inflammatory factors	GCST90274793.tsv.gz	HTR1B	rs544053418	0.0350739
metabolin	GCST90199626	HTR1F	rs552158992	0.0236247
metabolin	GCST90199789	HTR1F	rs552158992	0.0119014
metabolin	GCST90199923	HTR1F	rs552158992	0.0144011
metabolin	GCST90199986	HTR1F	rs552158992	0.0120091
metabolin	GCST90200015	HTR1F	rs552158992	0.0106206
metabolin	GCST90200212	HTR1F	rs552158992	0.0178753
metabolin	GCST90200271	HTR1F	rs552158992	0.00990335
metabolin	GCST90200351	HTR1F	rs552158992	0.00973214
metabolin	GCST90200732	HTR1F	rs552158992	0.0167653
metabolin	GCST90200929	HTR1F	rs552158992	0.0444191
immunocyte	ebi-a-GCST90001520.txt.gz	HTR1F	rs552158992	0.0137417
immunocyte	ebi-a-GCST90001524.txt.gz	HTR1F	rs552158992	0.0247068
immunocyte	ebi-a-GCST90001876.txt.gz	HTR1F	rs552158992	0.0178192
immunocyte	ebi-a-GCST90001880.txt.gz	HTR1F	rs552158992	0.0177727
metabolin	GCST90200310	CALCRL	rs552259614	0.0239736
metabolin	GCST90199743	HTR1F	rs554025478	0.00938366
metabolin	GCST90199756	HTR1F	rs554025478	0.00969366
metabolin	GCST90199802	HTR1F	rs554025478	0.0121734
metabolin	GCST90200305	HTR1F	rs554025478	0.0245017
metabolin	GCST90200402	HTR1F	rs554025478	0.0154094
metabolin	GCST90200469	HTR1F	rs554025478	0.0433222
metabolin	GCST90200578	HTR1F	rs554025478	0.00915503
metabolin	GCST90200614	HTR1F	rs554025478	0.0103609
metabolin	GCST90200827	HTR1F	rs554025478	0.00881419
metabolin	GCST90201015	SCN1A	rs55715428	0.0291011
inflammatory factors	GCST90274831.tsv.gz	SCN1A	rs55715428	0.134697
metabolin	GCST90200011	SCN1A	rs557308497	0.0149399
immunocyte	ebi-a-GCST90001520.txt.gz	CALCRL	rs55735884	0.0427218
immunocyte	ebi-a-GCST90001767.txt.gz	CALCRL	rs55735884	0.0308324
inflammatory factors	GCST90274831.tsv.gz	CALCRL	rs55735884	0.0975574
immunocyte	ebi-a-GCST90001525.txt.gz	HTR1D	rs55941480	0.0709233
metabolin	GCST90199897	HTR1B	rs561429852	0.0156371
metabolin	GCST90200237	HTR1D	rs563706816	0.0220845
intestinal flora	GCST90032490.txt.gz	HTR1D	rs565152784	0.0686456
inflammatory factors	GCST90274821.tsv.gz	ATP1A2	rs567787662	0.0362551
metabolin	GCST90199869	HTR1B	rs571767796	0.0132136
metabolin	GCST90199756	HTR1B	rs572231127	0.0369975
immunocyte	ebi-a-GCST90001524.txt.gz	CALCRL	rs573305815	0.0160818
immunocyte	ebi-a-GCST90001525.txt.gz	CALCRL	rs573305815	0.0161686
immunocyte	ebi-a-GCST90001614.txt.gz	CALCRL	rs573305815	0.0162942
immunocyte	ebi-a-GCST90001873.txt.gz	CALCRL	rs573305815	0.0152117
immunocyte	ebi-a-GCST90001876.txt.gz	CALCRL	rs573305815	0.0161752
immunocyte	ebi-a-GCST90001881.txt.gz	CALCRL	rs573305815	0.0152657
immunocyte	ebi-a-GCST90001927.txt.gz	CALCRL	rs573305815	0.0163936
immunocyte	ebi-a-GCST90001999.txt.gz	CALCRL	rs573305815	0.0148457
immunocyte	ebi-a-GCST90002043.txt.gz	CALCRL	rs573305815	0.0137621
metabolin	GCST90199846	HTR1D	rs575791301	0.0388656
metabolin	GCST90200212	HTR1D	rs575791301	0.0186655
metabolin	GCST90200236	HTR1D	rs575791301	0.0329768
metabolin	GCST90200562	HTR1D	rs575791301	0.0235584
metabolin	GCST90200953	HTR1D	rs575791301	0.0302676
immunocyte	ebi-a-GCST90001502.txt.gz	HTR1D	rs575791301	0.0278183
immunocyte	ebi-a-GCST90001520.txt.gz	HTR1D	rs575791301	0.0296485
immunocyte	ebi-a-GCST90001524.txt.gz	HTR1D	rs575791301	0.033802
immunocyte	ebi-a-GCST90001610.txt.gz	HTR1D	rs575791301	0.0541252
immunocyte	ebi-a-GCST90001627.txt.gz	HTR1D	rs575791301	0.0300656
immunocyte	ebi-a-GCST90001667.txt.gz	HTR1D	rs575791301	0.0509791
immunocyte	ebi-a-GCST90001674.txt.gz	HTR1D	rs575791301	0.030115
immunocyte	ebi-a-GCST90001746.txt.gz	HTR1D	rs575791301	0.027866
immunocyte	ebi-a-GCST90001758.txt.gz	HTR1D	rs575791301	0.0276484
immunocyte	ebi-a-GCST90001767.txt.gz	HTR1D	rs575791301	0.0290563
immunocyte	ebi-a-GCST90001863.txt.gz	HTR1D	rs575791301	0.0227724
immunocyte	ebi-a-GCST90001873.txt.gz	HTR1D	rs575791301	0.0370652
immunocyte	ebi-a-GCST90001876.txt.gz	HTR1D	rs575791301	0.0313897
immunocyte	ebi-a-GCST90001880.txt.gz	HTR1D	rs575791301	0.03394
immunocyte	ebi-a-GCST90001881.txt.gz	HTR1D	rs575791301	0.0327084
immunocyte	ebi-a-GCST90001927.txt.gz	HTR1D	rs575791301	0.0316704
immunocyte	ebi-a-GCST90001933.txt.gz	HTR1D	rs575791301	0.0345205
immunocyte	ebi-a-GCST90001999.txt.gz	HTR1D	rs575791301	0.0273357
immunocyte	ebi-a-GCST90002043.txt.gz	HTR1D	rs575791301	0.0282321
immunocyte	ebi-a-GCST90002055.txt.gz	HTR1D	rs575791301	0.0325878
intestinal flora	GCST90032574.txt.gz	ATP1A2	rs57902412	0.208057
intestinal flora	GCST90032388.txt.gz	HTR1D	rs588641	0.0506392
intestinal flora	GCST90032389.txt.gz	HTR1D	rs588641	0.0468881
inflammatory factors	GCST90274793.tsv.gz	HTR1F	rs59893630	0.0940822
inflammatory factors	GCST90274831.tsv.gz	HTR1F	rs59893630	0.0241492
intestinal flora	GCST90032434.txt.gz	CALCRL	rs60110760	0.0217228
intestinal flora	GCST90032574.txt.gz	CALCRL	rs60110760	0.0196514
intestinal flora	GCST90032622.txt.gz	CALCRL	rs60110760	0.0192382
intestinal flora	GCST90032643.txt.gz	CALCRL	rs60110760	0.0181933
metabolin	GCST90199626	CACNA1A	rs62111968	0.806649
metabolin	GCST90199743	CACNA1A	rs62111968	0.770446
metabolin	GCST90199756	CACNA1A	rs62111968	0.715804
metabolin	GCST90199789	CACNA1A	rs62111968	0.661552
metabolin	GCST90199802	CACNA1A	rs62111968	0.660245
metabolin	GCST90199832	CACNA1A	rs62111968	0.771349
metabolin	GCST90199846	CACNA1A	rs62111968	0.715575
metabolin	GCST90199869	CACNA1A	rs62111968	0.683013
metabolin	GCST90199897	CACNA1A	rs62111968	0.716125
metabolin	GCST90199919	CACNA1A	rs62111968	0.716885
metabolin	GCST90199923	CACNA1A	rs62111968	0.67862
metabolin	GCST90199969	CACNA1A	rs62111968	0.703335
metabolin	GCST90199986	CACNA1A	rs62111968	0.722332
metabolin	GCST90200011	CACNA1A	rs62111968	0.738112
metabolin	GCST90200015	CACNA1A	rs62111968	0.735598
metabolin	GCST90200070	CACNA1A	rs62111968	0.690006
metabolin	GCST90200136	CACNA1A	rs62111968	0.631114
metabolin	GCST90200149	CACNA1A	rs62111968	0.662589
metabolin	GCST90200212	CACNA1A	rs62111968	0.721399
metabolin	GCST90200217	CACNA1A	rs62111968	0.73186
metabolin	GCST90200236	CACNA1A	rs62111968	0.735577
metabolin	GCST90200237	CACNA1A	rs62111968	0.69602
metabolin	GCST90200271	CACNA1A	rs62111968	0.741525
metabolin	GCST90200305	CACNA1A	rs62111968	0.712235
metabolin	GCST90200310	CACNA1A	rs62111968	0.83887
metabolin	GCST90200341	CACNA1A	rs62111968	0.624873
metabolin	GCST90200351	CACNA1A	rs62111968	0.714162
metabolin	GCST90200402	CACNA1A	rs62111968	0.745776
metabolin	GCST90200469	CACNA1A	rs62111968	0.637593
metabolin	GCST90200506	CACNA1A	rs62111968	0.791416
metabolin	GCST90200562	CACNA1A	rs62111968	0.709682
metabolin	GCST90200578	CACNA1A	rs62111968	0.70938
metabolin	GCST90200595	CACNA1A	rs62111968	0.712503
metabolin	GCST90200609	CACNA1A	rs62111968	0.744514
metabolin	GCST90200614	CACNA1A	rs62111968	0.692774
metabolin	GCST90200635	CACNA1A	rs62111968	0.725477
metabolin	GCST90200654	CACNA1A	rs62111968	0.78181
metabolin	GCST90200709	CACNA1A	rs62111968	0.817909
metabolin	GCST90200732	CACNA1A	rs62111968	0.71888
metabolin	GCST90200808	CACNA1A	rs62111968	0.764506
metabolin	GCST90200812	CACNA1A	rs62111968	0.720096
metabolin	GCST90200814	CACNA1A	rs62111968	0.714347
metabolin	GCST90200929	CACNA1A	rs62111968	0.722945
metabolin	GCST90200953	CACNA1A	rs62111968	0.720884
metabolin	GCST90201015	CACNA1A	rs62111968	0.665696
inflammatory factors	GCST90274768.tsv.gz	CACNA1A	rs62111968	0.702086
inflammatory factors	GCST90274774.tsv.gz	CACNA1A	rs62111968	0.703293
inflammatory factors	GCST90274793.tsv.gz	CACNA1A	rs62111968	0.732489
inflammatory factors	GCST90274821.tsv.gz	CACNA1A	rs62111968	0.739532
inflammatory factors	GCST90274831.tsv.gz	CACNA1A	rs62111968	0.751874
metabolin	GCST90200953	CALCRL	rs62172398	0.0379371
metabolin	GCST90200469	SCN1A	rs62174752	0.0319521
metabolin	GCST90199923	CALCRL	rs62181041	0.0390711
metabolin	GCST90200808	HTR1B	rs62433563	0.0139867
immunocyte	ebi-a-GCST90001520.txt.gz	CACNA1A	rs6511853	0.301923
metabolin	GCST90199832	ATP1A2	rs6699059	0.0891939
metabolin	GCST90199969	ATP1A2	rs6699059	0.100736
metabolin	GCST90199986	ATP1A2	rs6699059	0.0240718
metabolin	GCST90200070	ATP1A2	rs6699059	0.141434
metabolin	GCST90200212	ATP1A2	rs6699059	0.0261868
metabolin	GCST90200310	ATP1A2	rs6699059	0.0550323
metabolin	GCST90200341	ATP1A2	rs6699059	0.0275857
metabolin	GCST90200469	ATP1A2	rs6699059	0.0723654
metabolin	GCST90200953	ATP1A2	rs6699059	0.0465018
immunocyte	ebi-a-GCST90001502.txt.gz	ATP1A2	rs6699059	0.0244232
immunocyte	ebi-a-GCST90001520.txt.gz	ATP1A2	rs6699059	0.0395295
immunocyte	ebi-a-GCST90001524.txt.gz	ATP1A2	rs6699059	0.046887
immunocyte	ebi-a-GCST90001525.txt.gz	ATP1A2	rs6699059	0.0382467
immunocyte	ebi-a-GCST90001610.txt.gz	ATP1A2	rs6699059	0.0424781
immunocyte	ebi-a-GCST90001674.txt.gz	ATP1A2	rs6699059	0.0497273
immunocyte	ebi-a-GCST90001746.txt.gz	ATP1A2	rs6699059	0.0340091
immunocyte	ebi-a-GCST90001767.txt.gz	ATP1A2	rs6699059	0.0436613
immunocyte	ebi-a-GCST90001873.txt.gz	ATP1A2	rs6699059	0.0771061
immunocyte	ebi-a-GCST90001876.txt.gz	ATP1A2	rs6699059	0.0323765
immunocyte	ebi-a-GCST90001880.txt.gz	ATP1A2	rs6699059	0.0338441
immunocyte	ebi-a-GCST90001881.txt.gz	ATP1A2	rs6699059	0.0314719
immunocyte	ebi-a-GCST90001927.txt.gz	ATP1A2	rs6699059	0.0304806
immunocyte	ebi-a-GCST90001933.txt.gz	ATP1A2	rs6699059	0.0444788
immunocyte	ebi-a-GCST90002043.txt.gz	ATP1A2	rs6699059	0.0499471
immunocyte	ebi-a-GCST90002055.txt.gz	ATP1A2	rs6699059	0.167129
inflammatory factors	GCST90274793.tsv.gz	ATP1A2	rs6699059	0.0781809
inflammatory factors	GCST90274831.tsv.gz	ATP1A2	rs6699059	0.205381
immunocyte	ebi-a-GCST90001614.txt.gz	ATP1A2	rs67215453	0.20425
immunocyte	ebi-a-GCST90001873.txt.gz	HTR1F	rs6789002	0.0167817
intestinal flora	GCST90032388.txt.gz	HTR1F	rs6801412	0.0801217
intestinal flora	GCST90032389.txt.gz	HTR1F	rs6801412	0.0575082
metabolin	GCST90200217	HTR1F	rs6801412	0.0237513
immunocyte	ebi-a-GCST90001627.txt.gz	ATP1A2	rs71628162	0.0706016
metabolin	GCST90199919	HTR1D	rs72657856	0.0238228
metabolin	GCST90199923	HTR1D	rs72663229	0.158361
metabolin	GCST90200562	SCN1A	rs72884732	0.0105402
metabolin	GCST90200595	SCN1A	rs72885055	0.0496382
intestinal flora	GCST90032290.txt.gz	HTR1B	rs72886920	0.154893
intestinal flora	GCST90032357.txt.gz	HTR1B	rs72886920	0.0860069
intestinal flora	GCST90032388.txt.gz	HTR1B	rs72886920	0.158222
intestinal flora	GCST90032389.txt.gz	HTR1B	rs72886920	0.157222
intestinal flora	GCST90032434.txt.gz	HTR1B	rs72886920	0.138616
intestinal flora	GCST90032490.txt.gz	HTR1B	rs72886920	0.0998571
intestinal flora	GCST90032571.txt.gz	HTR1B	rs72886920	0.17762
intestinal flora	GCST90032574.txt.gz	HTR1B	rs72886920	0.155235
intestinal flora	GCST90032577.txt.gz	HTR1B	rs72886920	0.229354
metabolin	GCST90199846	CALCRL	rs72895351	0.00822641
immunocyte	ebi-a-GCST90001674.txt.gz	CALCRL	rs72895361	0.049703
intestinal flora	GCST90032245.txt.gz	CALCRL	rs72901468	0.0152662
intestinal flora	GCST90032246.txt.gz	CALCRL	rs72901468	0.013644
metabolin	GCST90199832	CALCRL	rs72902479	0.0093154
metabolin	GCST90199869	CALCRL	rs73038514	0.00654301
metabolin	GCST90199919	CALCRL	rs73038514	0.0124897
metabolin	GCST90201015	CALCRL	rs73038514	0.00764231
metabolin	GCST90199789	CALCRL	rs73051837	0.00888091
intestinal flora	GCST90032290.txt.gz	HTR1F	rs73139449	0.0201861
intestinal flora	GCST90032643.txt.gz	HTR1F	rs73139449	0.0391412
metabolin	GCST90200506	HTR1F	rs74378727	0.0155067
metabolin	GCST90199802	SCN1A	rs74444210	0.0227181
metabolin	GCST90199743	ATP1A2	rs747404766	0.0249515
metabolin	GCST90199897	ATP1A2	rs747404766	0.0277151
metabolin	GCST90199923	ATP1A2	rs747404766	0.0271183
metabolin	GCST90200011	ATP1A2	rs747404766	0.0268612
metabolin	GCST90200149	ATP1A2	rs747404766	0.0312528
metabolin	GCST90200217	ATP1A2	rs747404766	0.0211786
metabolin	GCST90200562	ATP1A2	rs747404766	0.0247934
metabolin	GCST90200609	ATP1A2	rs747404766	0.0333583
metabolin	GCST90200709	ATP1A2	rs747404766	0.0173359
metabolin	GCST90201015	ATP1A2	rs747404766	0.0270321
metabolin	GCST90199756	CALCRL	rs74747468	0.00485537
metabolin	GCST90200654	CALCRL	rs74747468	0.00445771
metabolin	GCST90200595	CALCRL	rs74929533	0.00901979
immunocyte	ebi-a-GCST90001502.txt.gz	HTR1B	rs750332804	0.0207787
immunocyte	ebi-a-GCST90001524.txt.gz	HTR1B	rs750332804	0.0241156
immunocyte	ebi-a-GCST90001614.txt.gz	HTR1B	rs750332804	0.0342882
immunocyte	ebi-a-GCST90001627.txt.gz	HTR1B	rs750332804	0.0245182
immunocyte	ebi-a-GCST90001674.txt.gz	HTR1B	rs750332804	0.0234134
immunocyte	ebi-a-GCST90001746.txt.gz	HTR1B	rs750332804	0.0254906
immunocyte	ebi-a-GCST90001758.txt.gz	HTR1B	rs750332804	0.0311831
immunocyte	ebi-a-GCST90001767.txt.gz	HTR1B	rs750332804	0.0272428
immunocyte	ebi-a-GCST90001863.txt.gz	HTR1B	rs750332804	0.0280517
immunocyte	ebi-a-GCST90001876.txt.gz	HTR1B	rs750332804	0.0426631
immunocyte	ebi-a-GCST90001880.txt.gz	HTR1B	rs750332804	0.0373616
immunocyte	ebi-a-GCST90001881.txt.gz	HTR1B	rs750332804	0.0456275
immunocyte	ebi-a-GCST90001927.txt.gz	HTR1B	rs750332804	0.0248673
immunocyte	ebi-a-GCST90001933.txt.gz	HTR1B	rs750332804	0.0262504
immunocyte	ebi-a-GCST90001978.txt.gz	HTR1B	rs750332804	0.0232568
immunocyte	ebi-a-GCST90001999.txt.gz	HTR1B	rs750332804	0.0492082
immunocyte	ebi-a-GCST90002043.txt.gz	HTR1B	rs750332804	0.0239963
immunocyte	ebi-a-GCST90002055.txt.gz	HTR1B	rs750332804	0.0238414
metabolin	GCST90200808	ATP1A2	rs7541727	0.0384057
intestinal flora	GCST90032245.txt.gz	ATP1A2	rs75426089	0.0549263
intestinal flora	GCST90032246.txt.gz	ATP1A2	rs75426089	0.0511322
intestinal flora	GCST90032357.txt.gz	ATP1A2	rs75426089	0.0290268
intestinal flora	GCST90032434.txt.gz	ATP1A2	rs75426089	0.0215972
intestinal flora	GCST90032490.txt.gz	ATP1A2	rs75426089	0.0314499
immunocyte	ebi-a-GCST90001674.txt.gz	CACNA1A	rs75783493	0.284234
immunocyte	ebi-a-GCST90001524.txt.gz	SCN1A	rs7588295	0.0464413
immunocyte	ebi-a-GCST90001667.txt.gz	SCN1A	rs7588295	0.0730419
metabolin	GCST90200341	CALCA	rs76000888	0.0622266
metabolin	GCST90200217	SCN1A	rs7601992	0.026844
immunocyte	ebi-a-GCST90001978.txt.gz	CALCRL	rs761005782	0.078823
metabolin	GCST90199832	HTR1D	rs76263470	0.0814743
intestinal flora	GCST90032245.txt.gz	HTR1F	rs76775578	0.0297332
intestinal flora	GCST90032246.txt.gz	HTR1F	rs76775578	0.0294159
intestinal flora	GCST90032490.txt.gz	HTR1F	rs76775578	0.0306842
intestinal flora	GCST90032571.txt.gz	HTR1F	rs76775578	0.0182977
intestinal flora	GCST90032574.txt.gz	HTR1F	rs76775578	0.0261097
metabolin	GCST90200136	HTR1F	rs76990298	0.0667519
intestinal flora	GCST90032434.txt.gz	CACNA1A	rs77336124	0.698206
metabolin	GCST90200136	HTR1B	rs7746060	0.0226109
intestinal flora	GCST90032622.txt.gz	ATP1A2	rs77697111	0.0449251
metabolin	GCST90199969	CALCRL	rs777805631	0.0039511
metabolin	GCST90199986	CALCRL	rs777805631	0.00600522
intestinal flora	GCST90032622.txt.gz	SCN1A	rs77914655	0.0910977
intestinal flora	GCST90032290.txt.gz	CACNA1A	rs77992514	0.0447257
intestinal flora	GCST90032577.txt.gz	CACNA1A	rs77992514	0.0164672
metabolin	GCST90200578	CALCA	rs78551414	0.0694974
metabolin	GCST90200578	CALCB	rs78551414	0.0681268
immunocyte	ebi-a-GCST90001525.txt.gz	CALCA	rs78644894	0.18017
immunocyte	ebi-a-GCST90001525.txt.gz	CALCB	rs78644894	0.171175
intestinal flora	GCST90032643.txt.gz	CACNA1A	rs78790849	0.0507928
metabolin	GCST90199869	ATP1A2	rs79207912	0.195577
metabolin	GCST90200310	HTR1F	rs79217128	0.0192262
metabolin	GCST90200011	CALCRL	rs79627408	0.0193307
intestinal flora	GCST90032388.txt.gz	ATP1A2	rs79818942	0.163042
intestinal flora	GCST90032577.txt.gz	ATP1A2	rs79818942	0.062382
metabolin	GCST90199743	SCN1A	rs80070916	0.128604
metabolin	GCST90200351	SCN1A	rs80133665	0.0290875
metabolin	GCST90200609	SCN1A	rs80133665	0.0098261
immunocyte	ebi-a-GCST90001520.txt.gz	SCN1A	rs80133665	0.0394136
immunocyte	ebi-a-GCST90001525.txt.gz	SCN1A	rs80133665	0.044652
immunocyte	ebi-a-GCST90002043.txt.gz	SCN1A	rs80133665	0.0567401
inflammatory factors	GCST90274793.tsv.gz	SCN1A	rs80133665	0.0979517
inflammatory factors	GCST90274768.tsv.gz	SCN1A	rs80229811	0.0870862
intestinal flora	GCST90032245.txt.gz	CALCA	rs903808	0.199824
intestinal flora	GCST90032245.txt.gz	CALCB	rs903808	0.199819
intestinal flora	GCST90032246.txt.gz	CALCA	rs903808	0.20894
intestinal flora	GCST90032246.txt.gz	CALCB	rs903808	0.208935
intestinal flora	GCST90032290.txt.gz	CALCA	rs903808	0.184001
intestinal flora	GCST90032290.txt.gz	CALCB	rs903808	0.184014
intestinal flora	GCST90032357.txt.gz	CALCA	rs903808	0.176259
intestinal flora	GCST90032357.txt.gz	CALCB	rs903808	0.176258
intestinal flora	GCST90032388.txt.gz	CALCA	rs903808	0.183784
intestinal flora	GCST90032388.txt.gz	CALCB	rs903808	0.183783
intestinal flora	GCST90032389.txt.gz	CALCA	rs903808	0.181833
intestinal flora	GCST90032389.txt.gz	CALCB	rs903808	0.181833
intestinal flora	GCST90032434.txt.gz	CALCA	rs903808	0.110546
intestinal flora	GCST90032434.txt.gz	CALCB	rs903808	0.110545
intestinal flora	GCST90032490.txt.gz	CALCA	rs903808	0.179101
intestinal flora	GCST90032490.txt.gz	CALCB	rs903808	0.179101
intestinal flora	GCST90032571.txt.gz	CALCA	rs903808	0.231915
intestinal flora	GCST90032571.txt.gz	CALCB	rs903808	0.231903
intestinal flora	GCST90032574.txt.gz	CALCA	rs903808	0.249876
intestinal flora	GCST90032574.txt.gz	CALCB	rs903808	0.249877
intestinal flora	GCST90032577.txt.gz	CALCA	rs903808	0.200491
intestinal flora	GCST90032577.txt.gz	CALCB	rs903808	0.200489
intestinal flora	GCST90032622.txt.gz	CALCA	rs903808	0.286672
intestinal flora	GCST90032622.txt.gz	CALCB	rs903808	0.286672
intestinal flora	GCST90032643.txt.gz	CALCA	rs903808	0.10926
intestinal flora	GCST90032643.txt.gz	CALCB	rs903808	0.10926
immunocyte	ebi-a-GCST90001520.txt.gz	HTR1B	rs9341648	0.0332279
